# Supplementary material for: Comparative Study of Ba, Cs, K, and Li as Promoters for Ru/La2Ce2O7-Based Catalyst for Ammonia Synthesis
Source: Hindawi journal article supplement (doi:10.1155/2023/2072245), 2023-05-13
Supplement: f1 [file 2072245.f1.zip]

Archive with 2 entries (2 files):
- Supplementary Description.docx
- Supplementary Materials.docx
