# Supplementary material for: Comparative Study of Ba, Cs, K, and Li as Promoters for Ru/La2Ce2O7-Based Catalyst for Ammonia Synthesis
Source: Hindawi journal article supplement (doi:10.1155/2023/2072245), 2023-05-13
Supplement: f1 [file 2072245.f1.zip › Supplementary Description.docx]

## Supplementary Description

Figure S1. Reduction temperature optimization

Figure S2. Catalytic activity test of Ru/Ba/LCO with different promoter loading (a) Pressure dependence of the ammonia synthesis rate at 400 °C. (b) Temperature dependence of the ammonia synthesis rate at 1 MPa, each of which had been reduced at 450 °C.

Figure S3. Catalytic activity test of Ru/Cs/LCO with different promoter loading. (a) Pressure dependence of the ammonia synthesis rate at 400 °C. (b) Temperature dependence of the ammonia synthesis rate at 1 MPa, each of which had been reduced at 450 °C.

Figure S4 Catalytic activity test of Ru/K/LCO with different promoter loading (a) Pressure dependence of the ammonia synthesis rate at 400 °C. (b) Temperature dependence of the ammonia synthesis rate at 1 MPa, each of which had been reduced at 450 °C.

Figure S5. Catalytic activity test of Ru/K/LCO with different promoter loading (a) Pressure dependence of the ammonia synthesis rate at 400 °C. (b) Temperature dependence of the ammonia synthesis rate at 1 MPa, each of which had been reduced at 450 °C.

Figure S6. X-ray diffraction patterns of Ru/Ba/LCO with different promoter compositions.

Figure S7. X-ray diffraction patterns of Ru/Cs/LCO with different promoter compositions.

Figure S8. X-ray diffraction patterns of Ru/K/LCO with different promoter compositions.

Figure S9. X-ray diffraction patterns of Ru/Li/LCO with different promoter compositions.

Figure S10. NH3 – synthesis rate correlation with Ru dispersion for Ru/Ba/LCO.

Figure S11. NH3 – synthesis rate correlation with Ru dispersion for Ru/Cs/LCO.

Figure S12. NH3 – synthesis rate correlation with Ru dispersion for Ru/K/LCO.

Figure S13. NH3 – synthesis rate correlation with Ru dispersion for Ru/Li/LCO.

Figure S14. NH3 – synthesis rate correlation with BET surface area for Ru/Ba/LCO.

Figure S15. NH3 – synthesis rate correlation with BET surface area for Ru/Cs/LCO.

Figure S16. NH3 – synthesis rate correlation with BET surface area for Ru/K/LCO.

Figure S17. NH3 – synthesis rate correlation with BET surface area for Ru/Li/LCO.

Figure S18. XPS Spectra of Ru/Ba/LCO with different promoter loading.

Figure S19. XPS Spectra of Ru/Cs/LCO with different promoter loading.

Figure S20. XPS Spectra of Ru/K/LCO with different promoter loading.

Figure S21. XPS Spectra of Ru/Li/LCO with different promoter loading.

Figure S22. H2SO4 conductivity value when measuring NH3-synthesis rate at 400 °C and 0.5 MPa

Figure S23. H2SO4 conductivity value when calibrated using NH3 solution

Figure S24. Reproducibility proof of Ru/LCO catalyst: (a) Temperature dependence of the ammonia synthesis rate at 1 MPa. (b) Pressure dependence of the ammonia synthesis rate at 400 °C, each catalyst had been reduced at 450 °C.

Figure S25. Reproducibility proof of Ru/Ba/LCO catalyst: (a) Temperature dependence of the ammonia synthesis rate at 1 MPa. (b) Pressure dependence of the ammonia synthesis rate at 400 °C, each catalyst had been reduced at 450 °C.

Figure S26. Reproducibility proof of Ru/Cs/LCO catalyst: (a) Temperature dependence of the ammonia synthesis rate at 1 MPa. (b) Pressure dependence of the ammonia synthesis rate at 400 °C, each catalyst had been reduced at 450 °C.

Figure S27. Reproducibility proof of Ru/K/LCO catalyst: (a) Temperature dependence of the ammonia synthesis rate at 1 MPa. (b) Pressure dependence of the ammonia synthesis rate at 400 °C, each catalyst had been reduced at 450 °C.

Figure S28. Reproducibility proof of Ru/Li/LCO catalyst: (a) Temperature dependence of the ammonia synthesis rate at 1 MPa. (b) Pressure dependence of the ammonia synthesis rate at 400 °C, each catalyst had been reduced at 450 °C.
