# Supplementary material for: Comparative Study of Ba, Cs, K, and Li as Promoters for Ru/La2Ce2O7-Based Catalyst for Ammonia Synthesis
Source: Hindawi journal article supplement (doi:10.1155/2023/2072245), 2023-05-13
Supplement: f1 [file 2072245.f1.zip › Supplementary Materials.docx]

*Supporting Information for*

**Comparative study of Ba, Cs, K, and Li as promoters for Ru/LaCeO3.5-based catalyst for ammonia synthesis**

Hizkia Manuel Vieri 1, 2, a, Arash Badakhsh 1, 3, a, Sun Hee Choi 1, 2, *

*1 Hydrogen·Fuel Cell Research Center, Korea Institute of Science and Technology (KIST), Seoul 02792, South Korea.
2 Energy & Environment Technology, KIST School, University of Science and Technology (UST), Seoul, South Korea.*

*3 PNDC, University of Strathclyde, Glasgow, Scotland, United Kingdom.*

a These authors contributed equally to this work

Correspondence should be addressed to Sun Hee Choi (E-mail: [shchoi@kist.re.kr](mailto:shchoi@kist.re.kr); Telephone: +82-10-9256-5908; Fax: +82-2-958-5199)

**Supporting Results**

Figure S1. Reduction temperature optimization


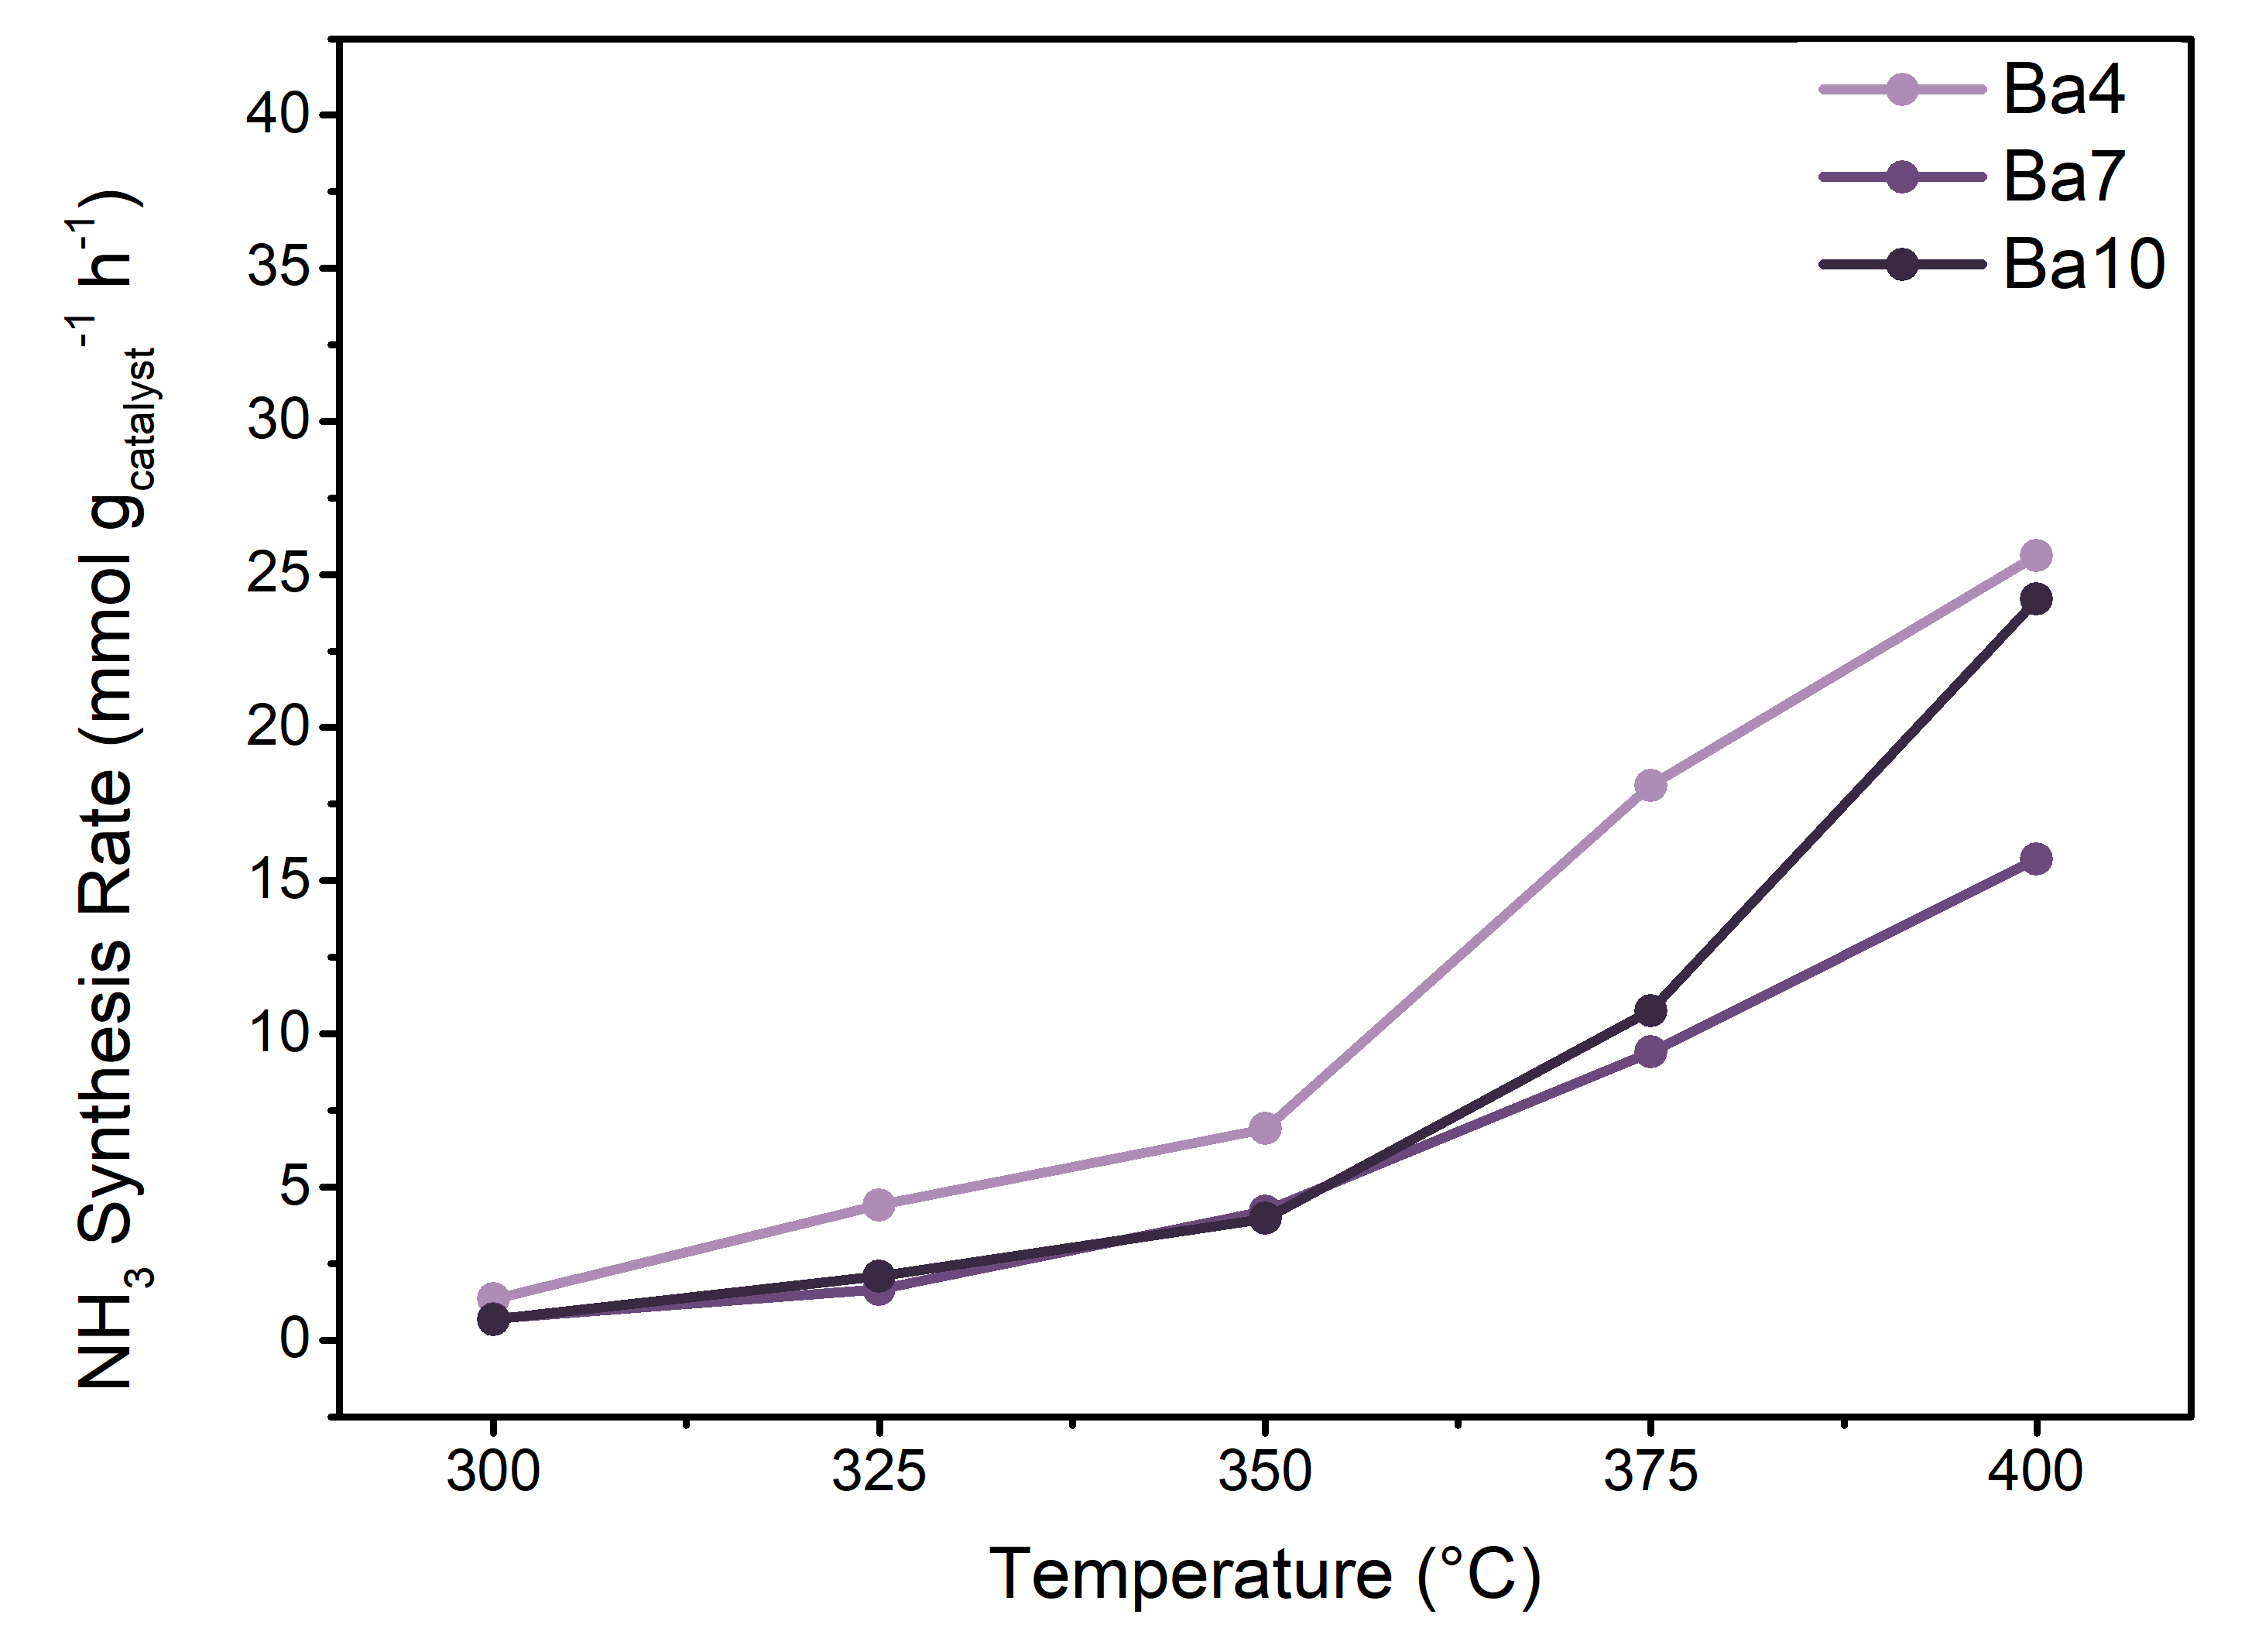

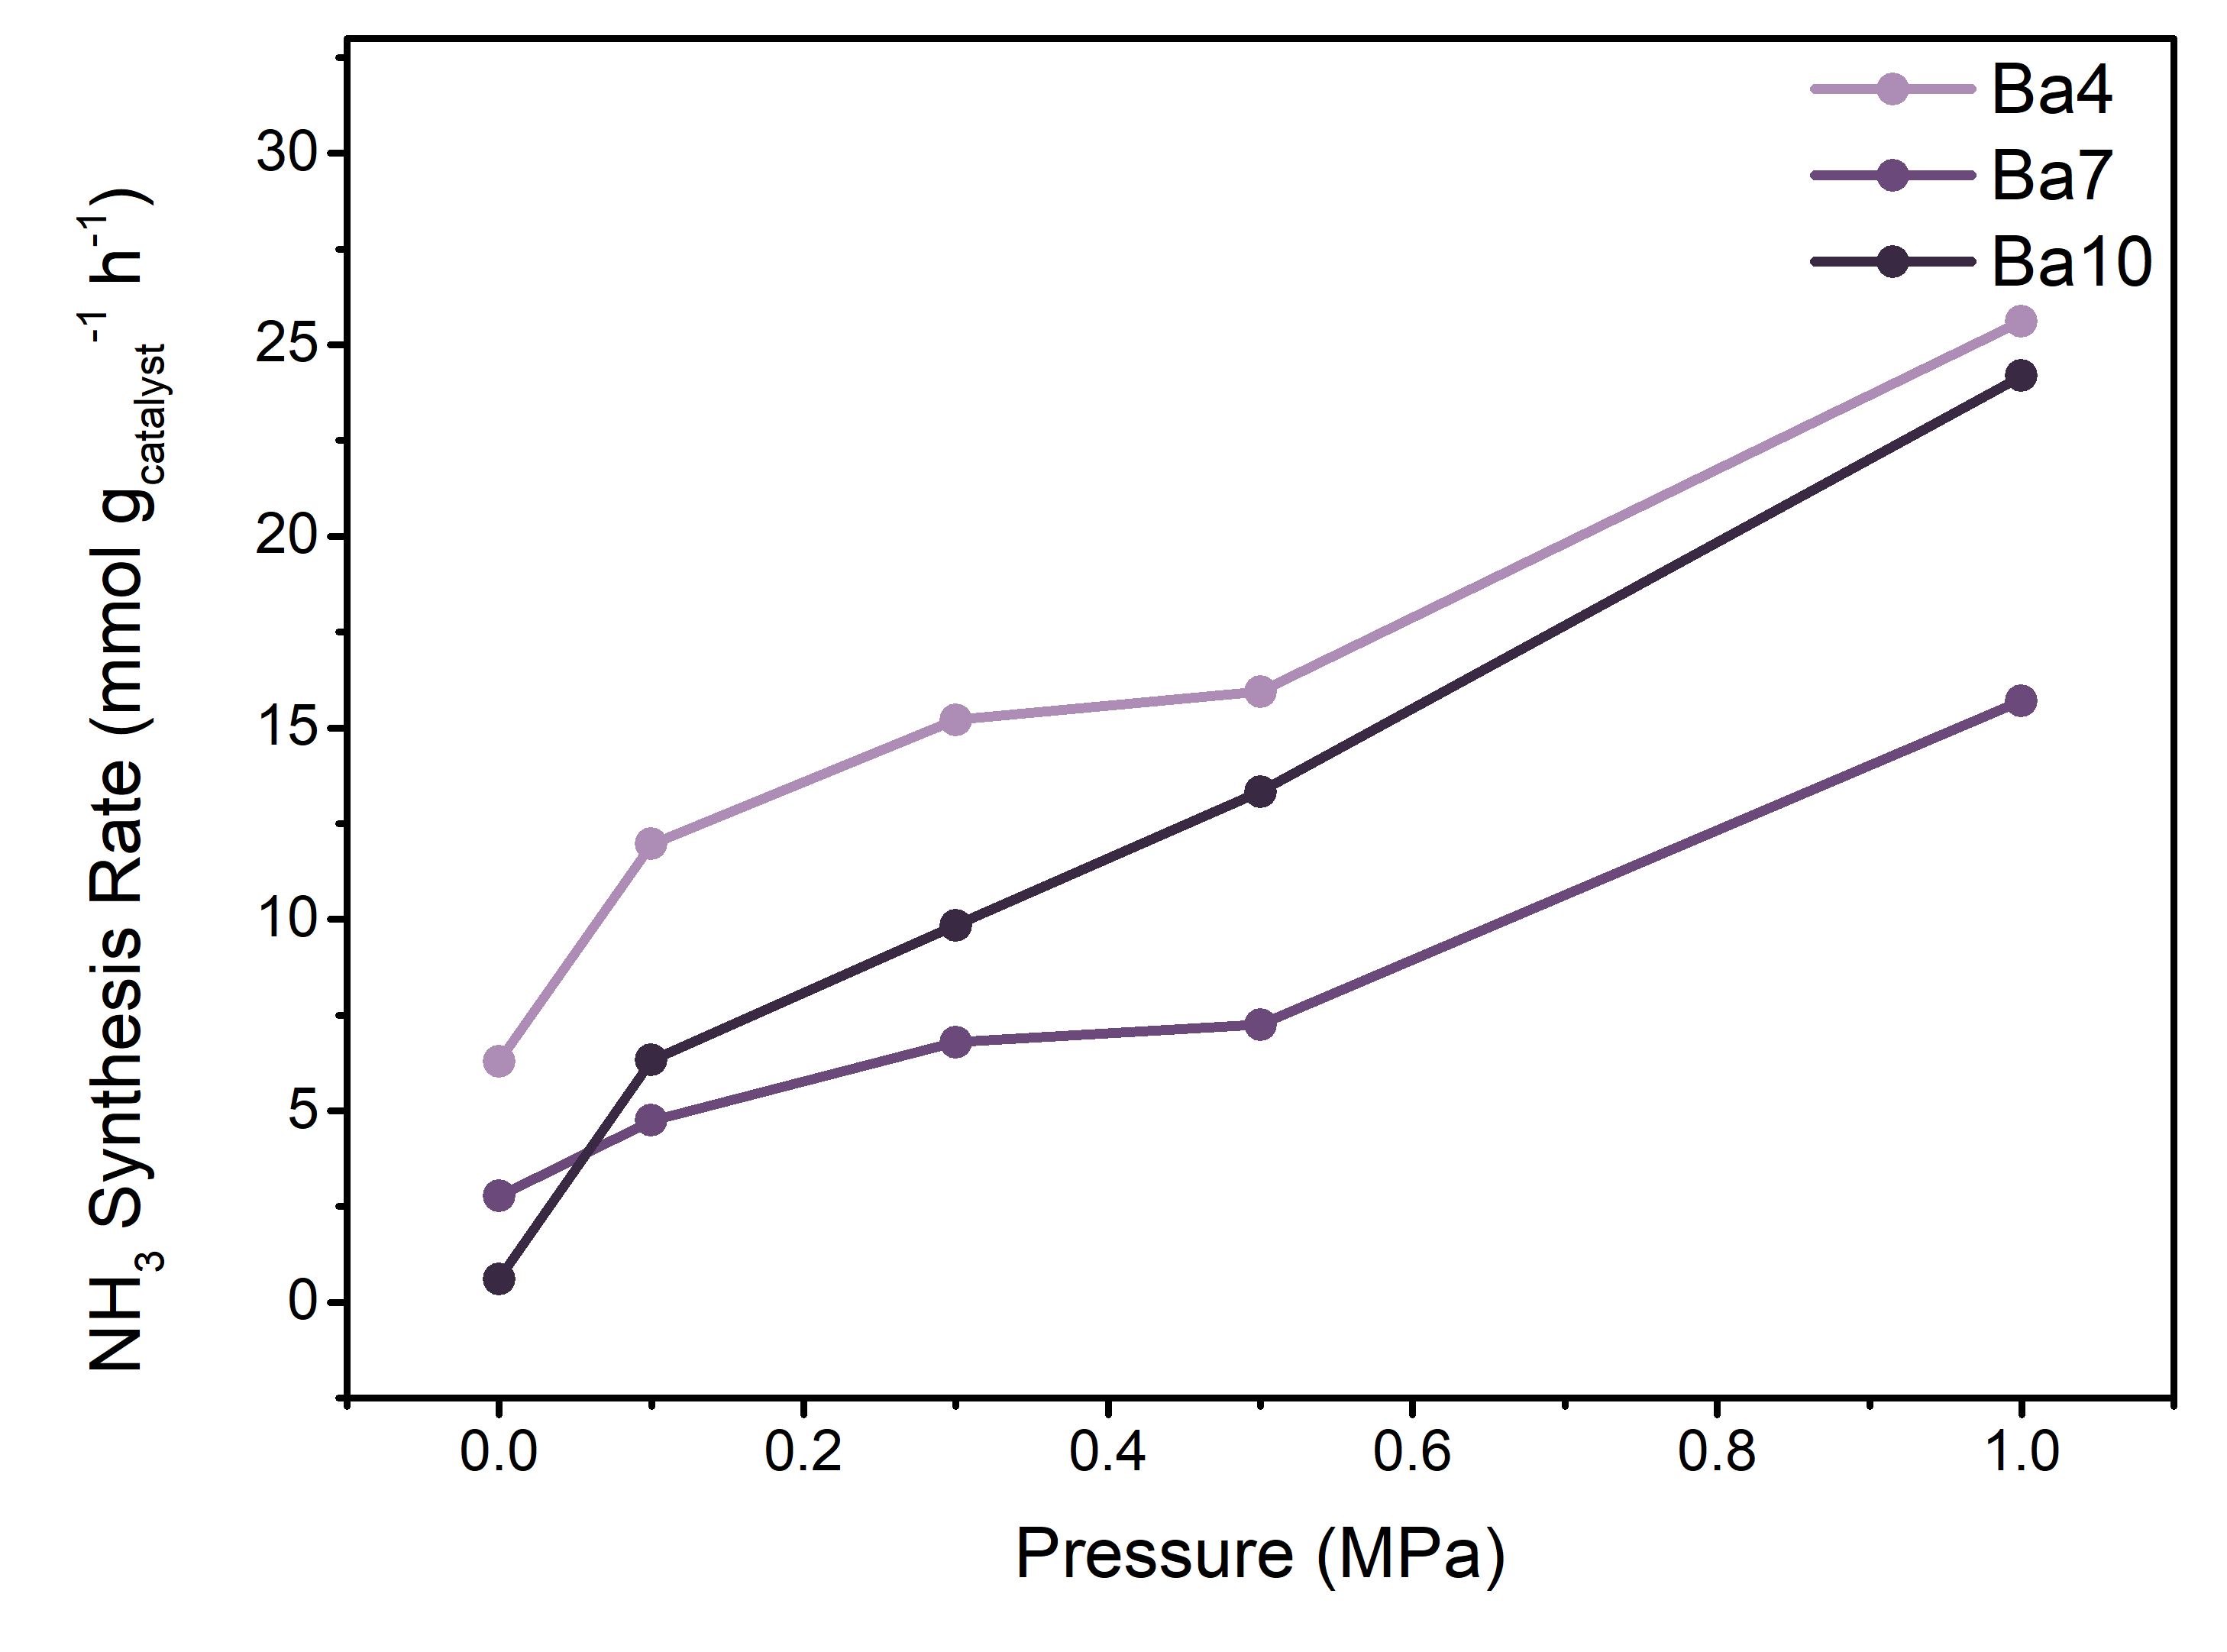


Figure S2. Catalytic activity test of Ru/Ba/LCO with different promoter loading (a) Pressure dependence of the ammonia synthesis rate at 400 °C. (b) Temperature dependence of the ammonia synthesis rate at 1 MPa, each of which had been reduced at 450 °C.


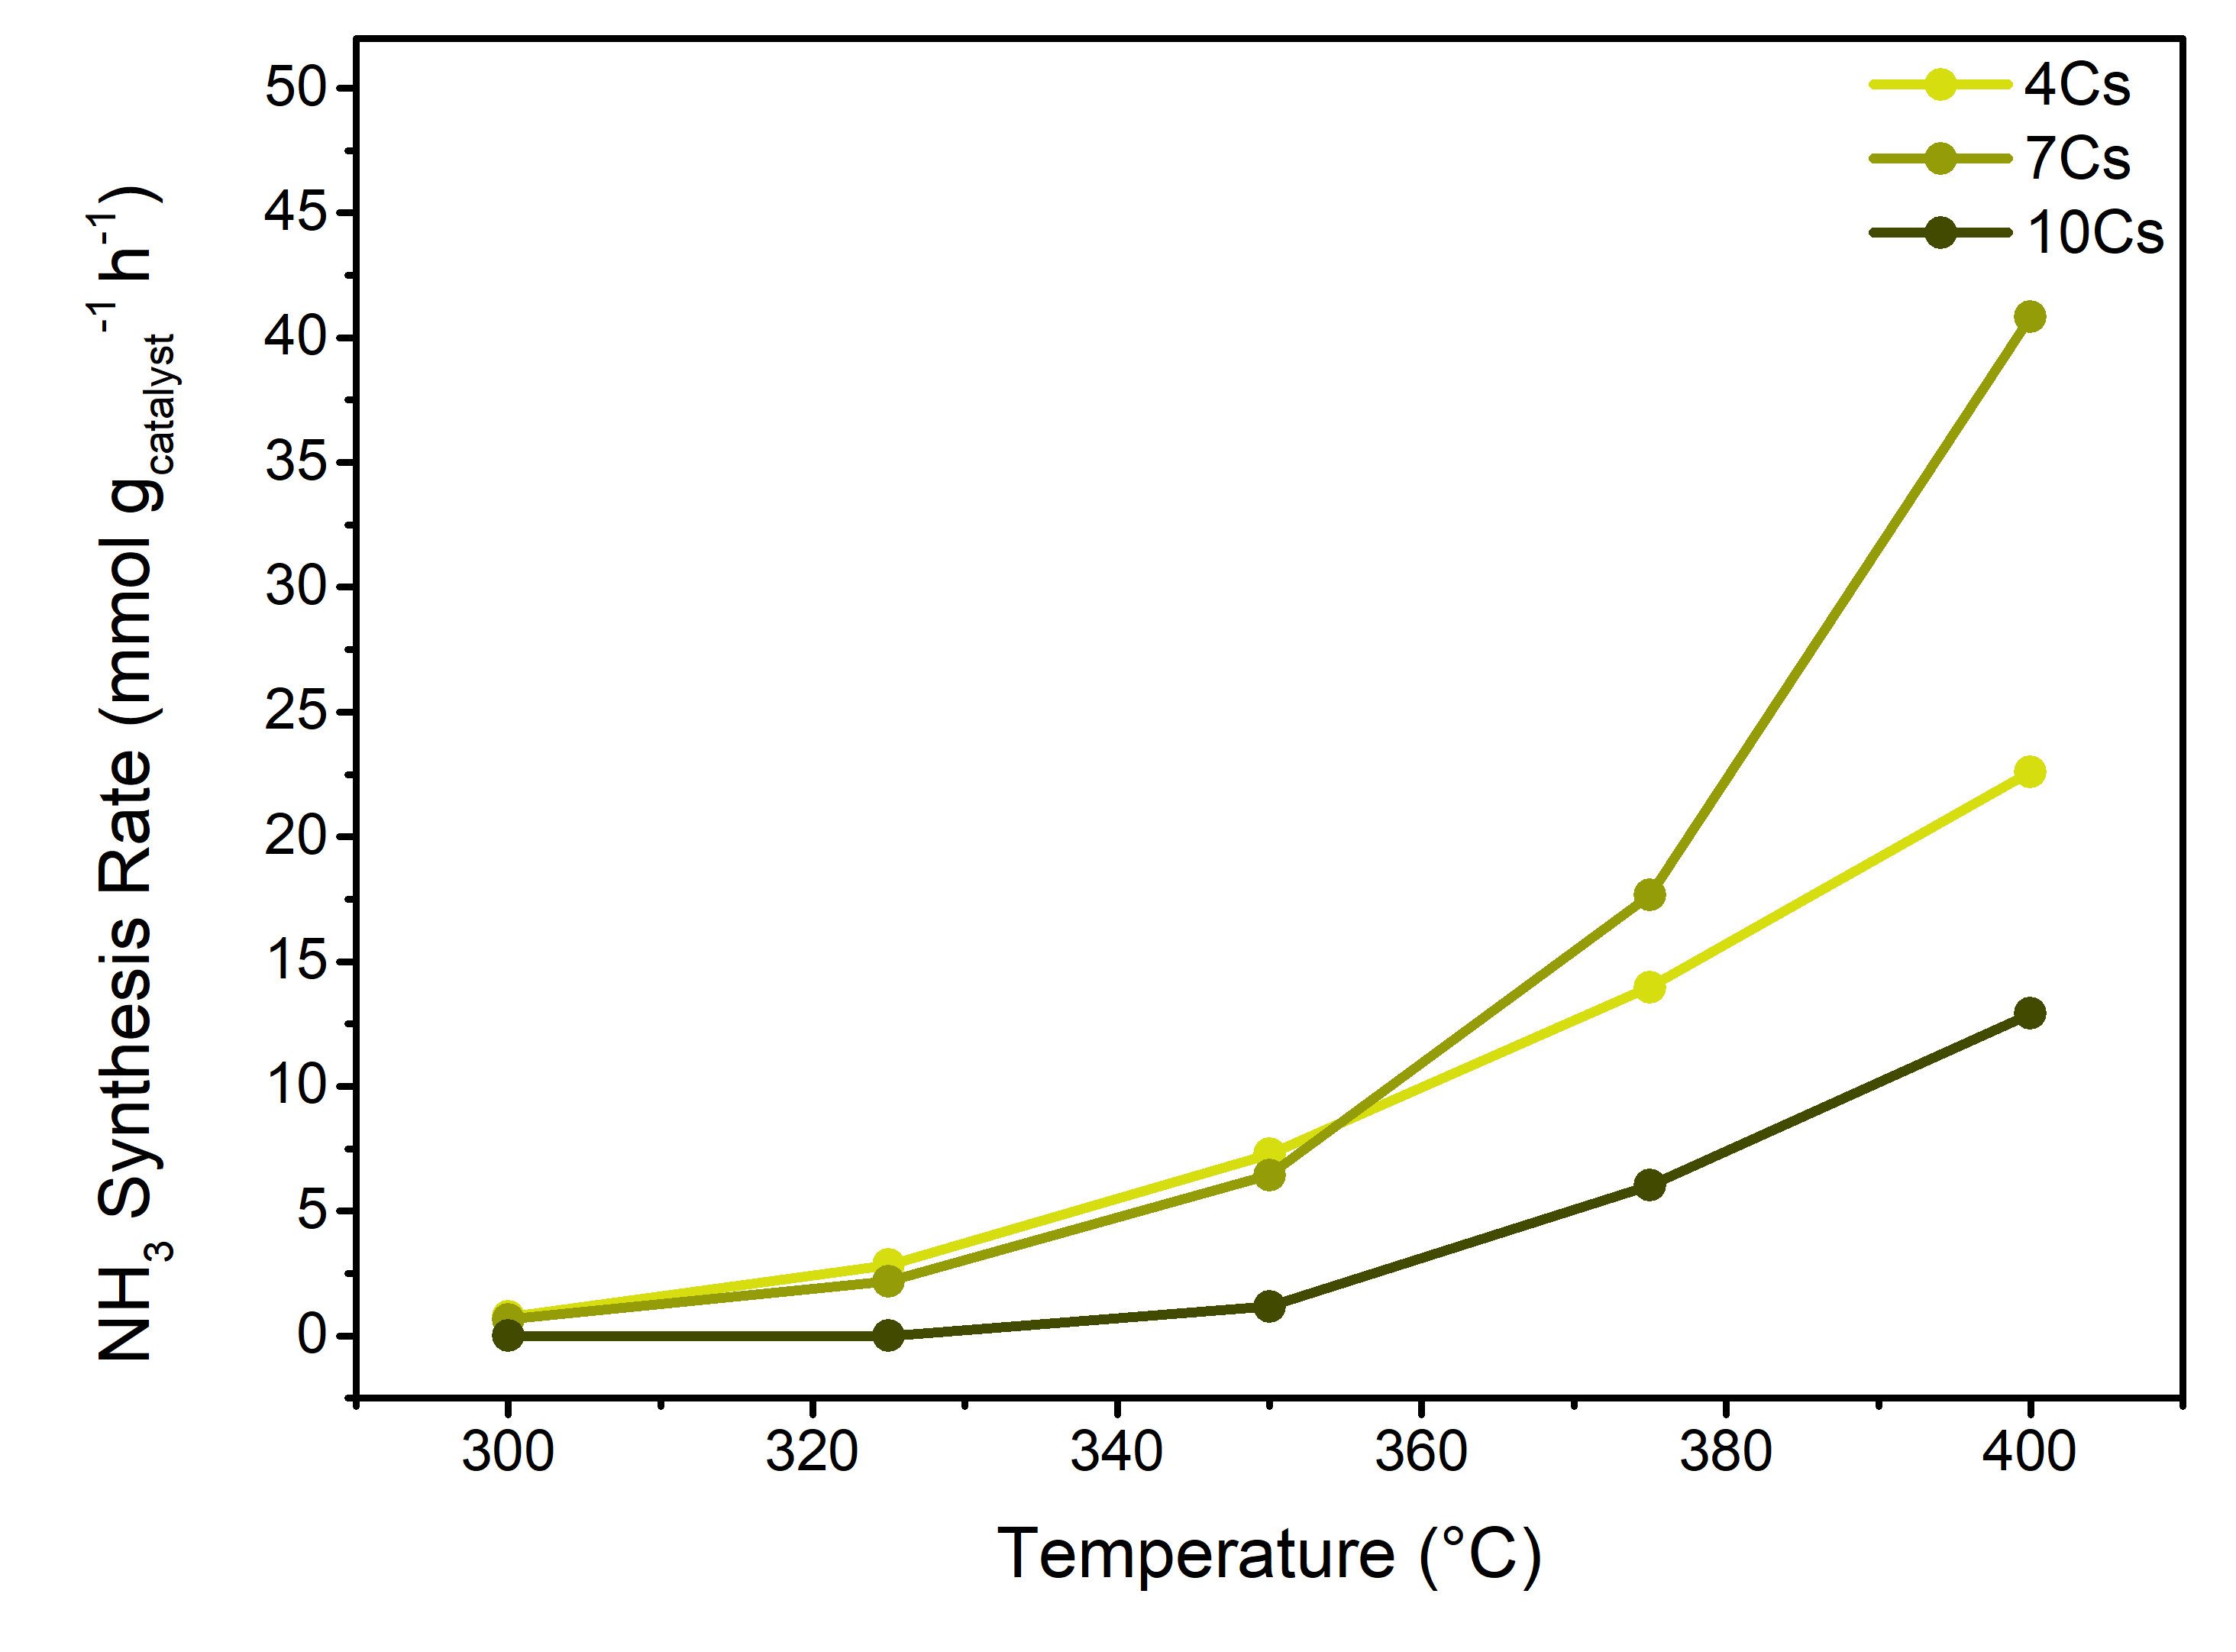

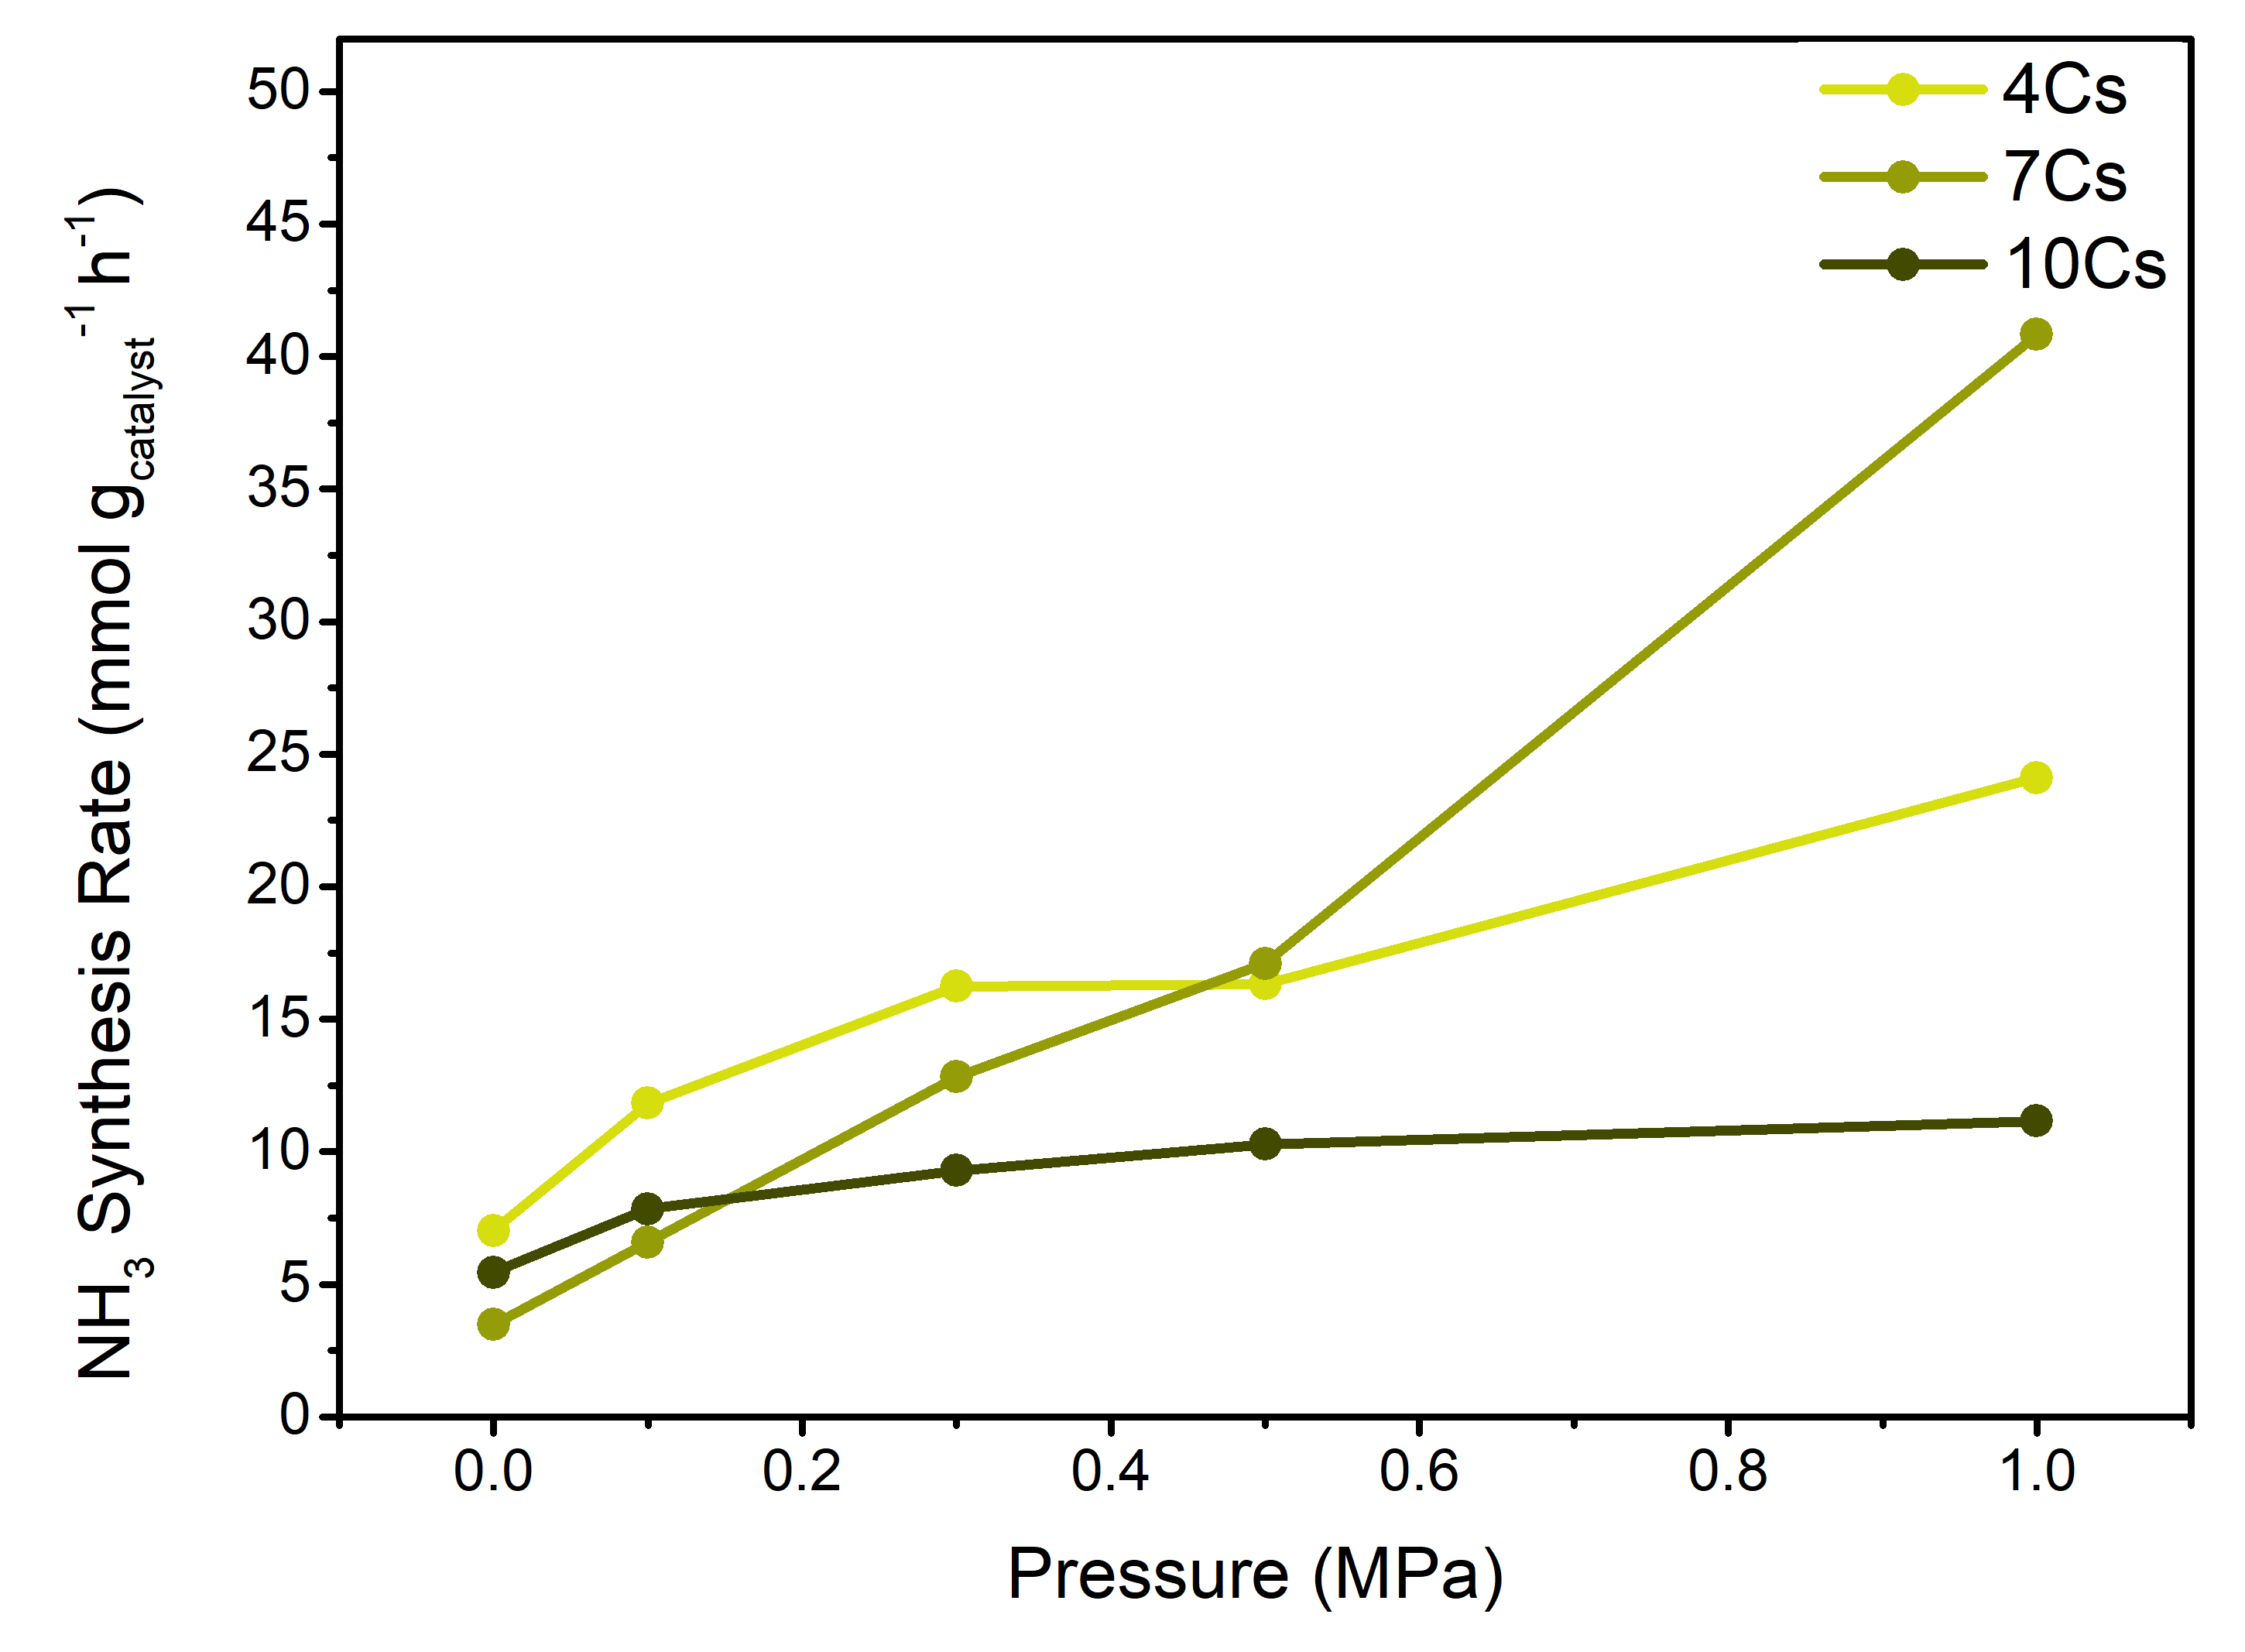


Figure S3. Catalytic activity test of Ru/Cs/LCO with different promoter loading. (a) Pressure dependence of the ammonia synthesis rate at 400 °C. (b) Temperature dependence of the ammonia synthesis rate at 1 MPa, each of which had been reduced at 450 °C.


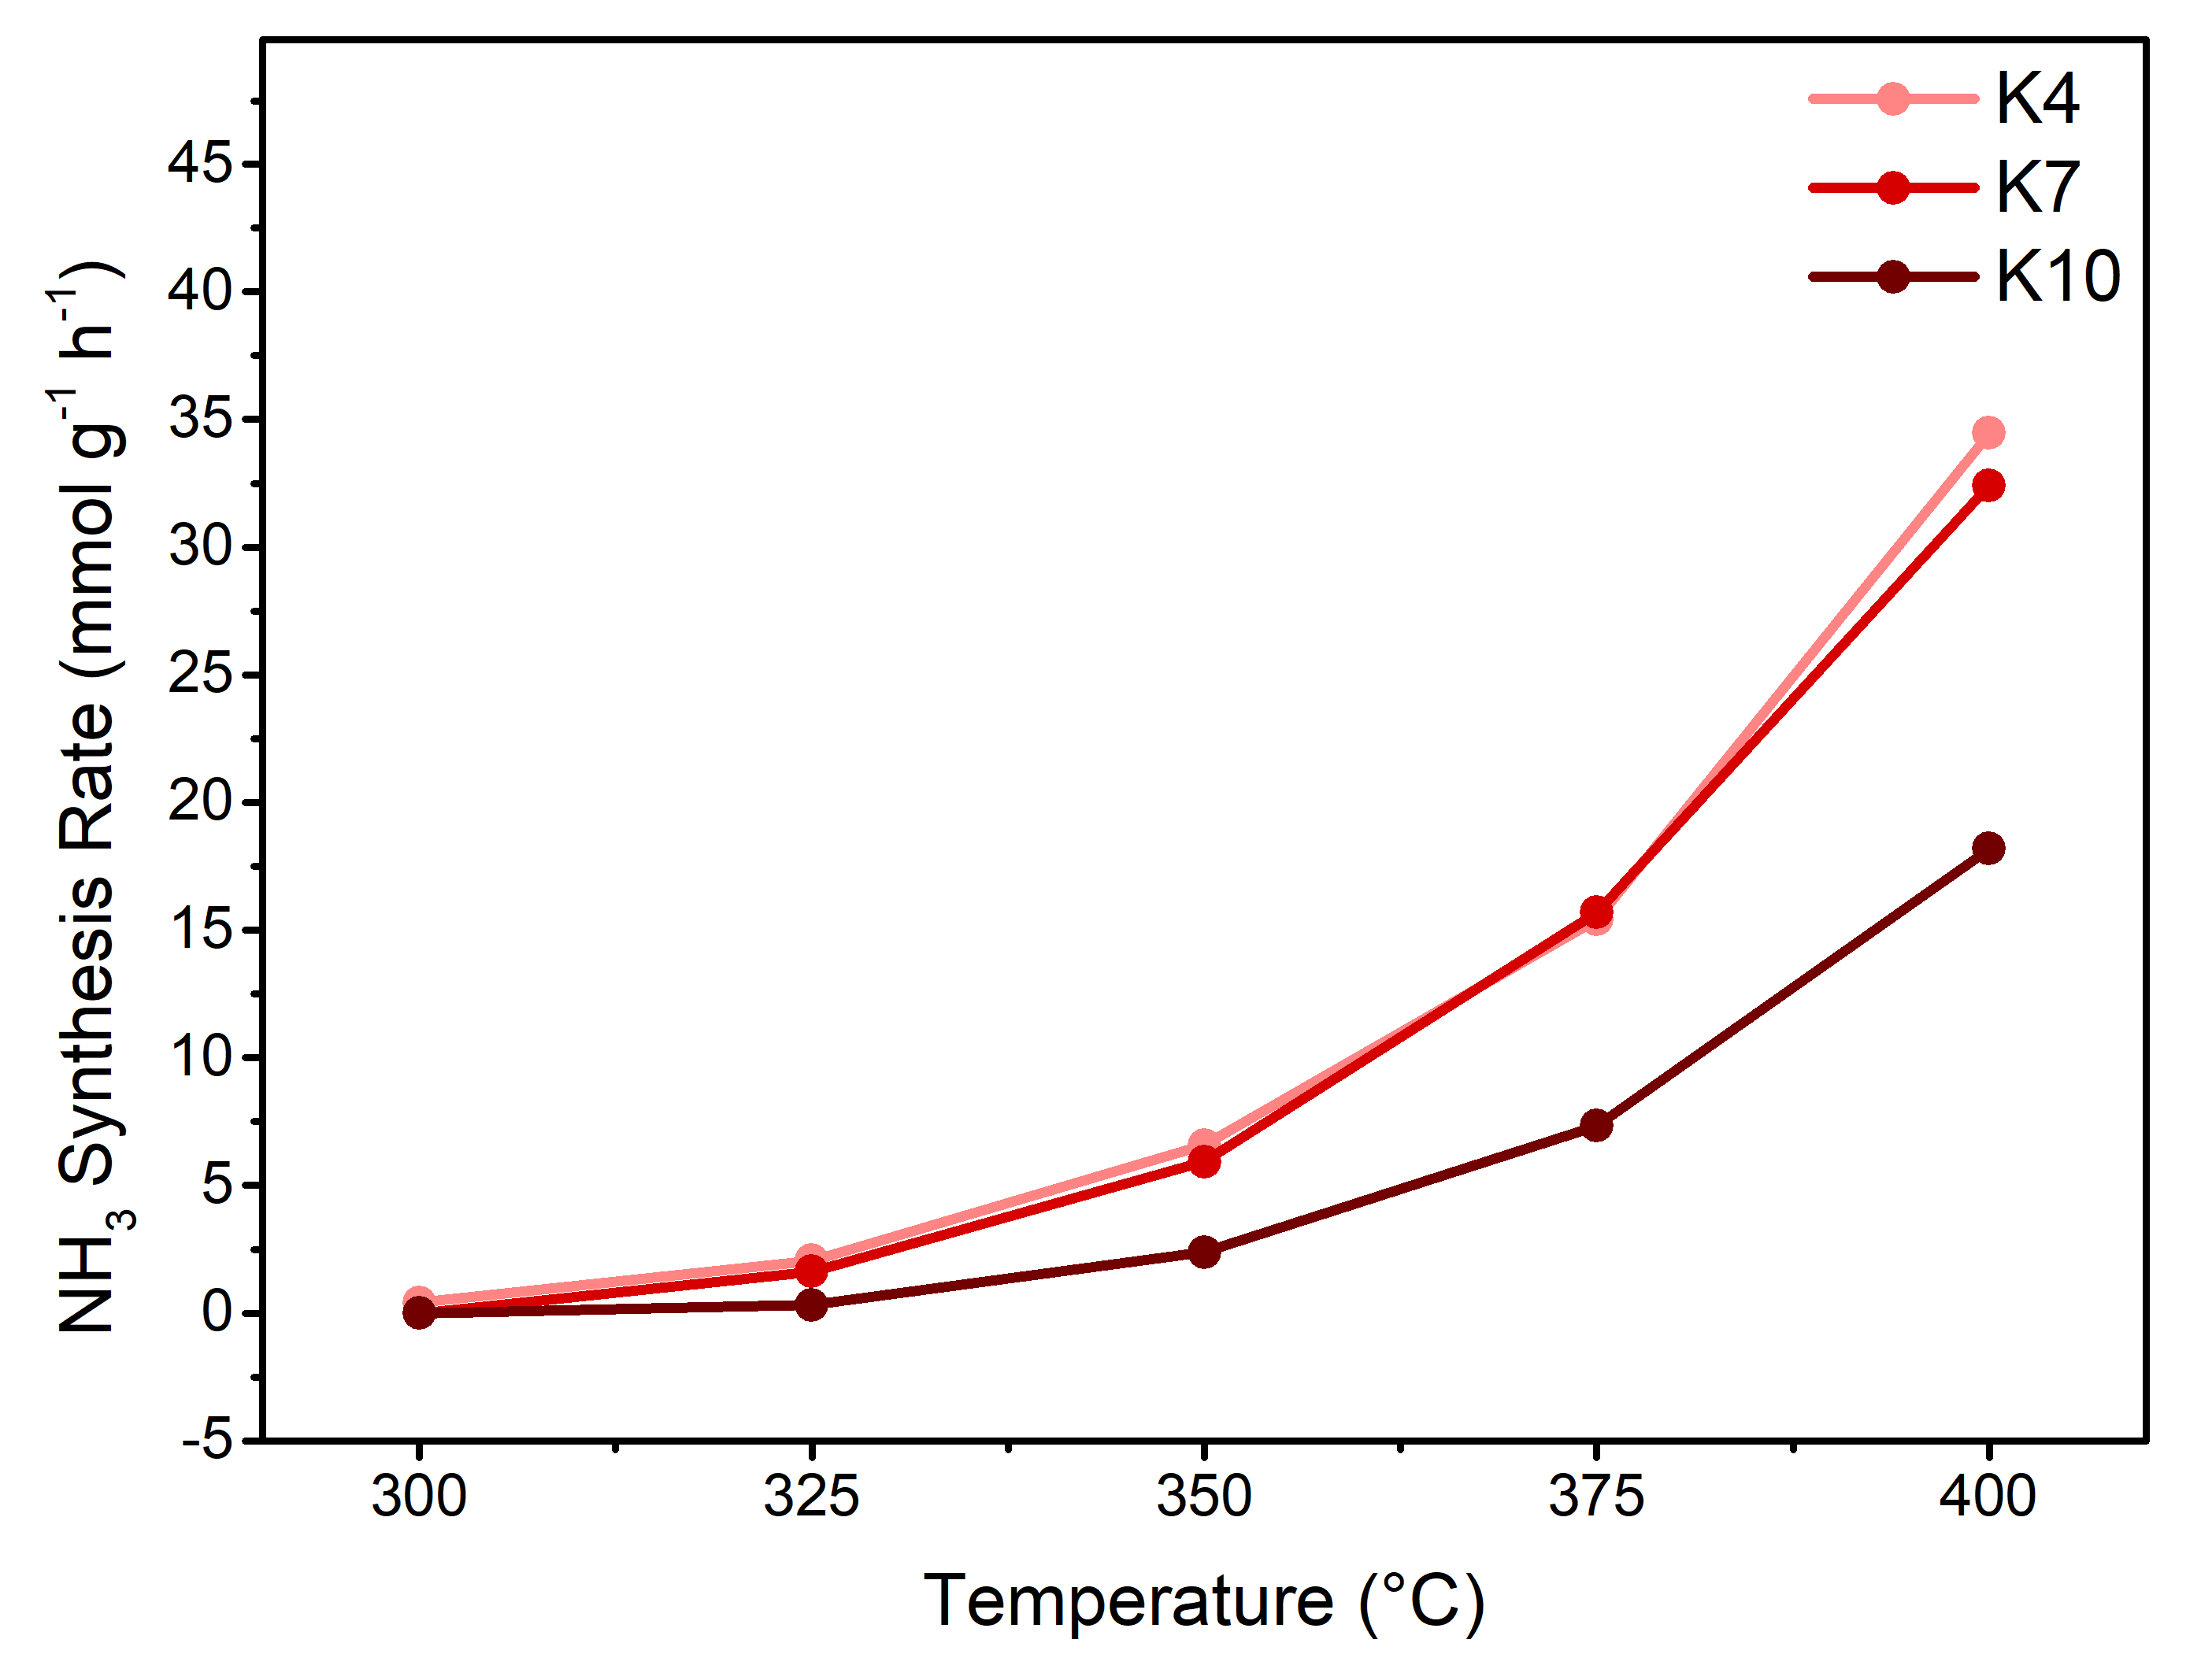

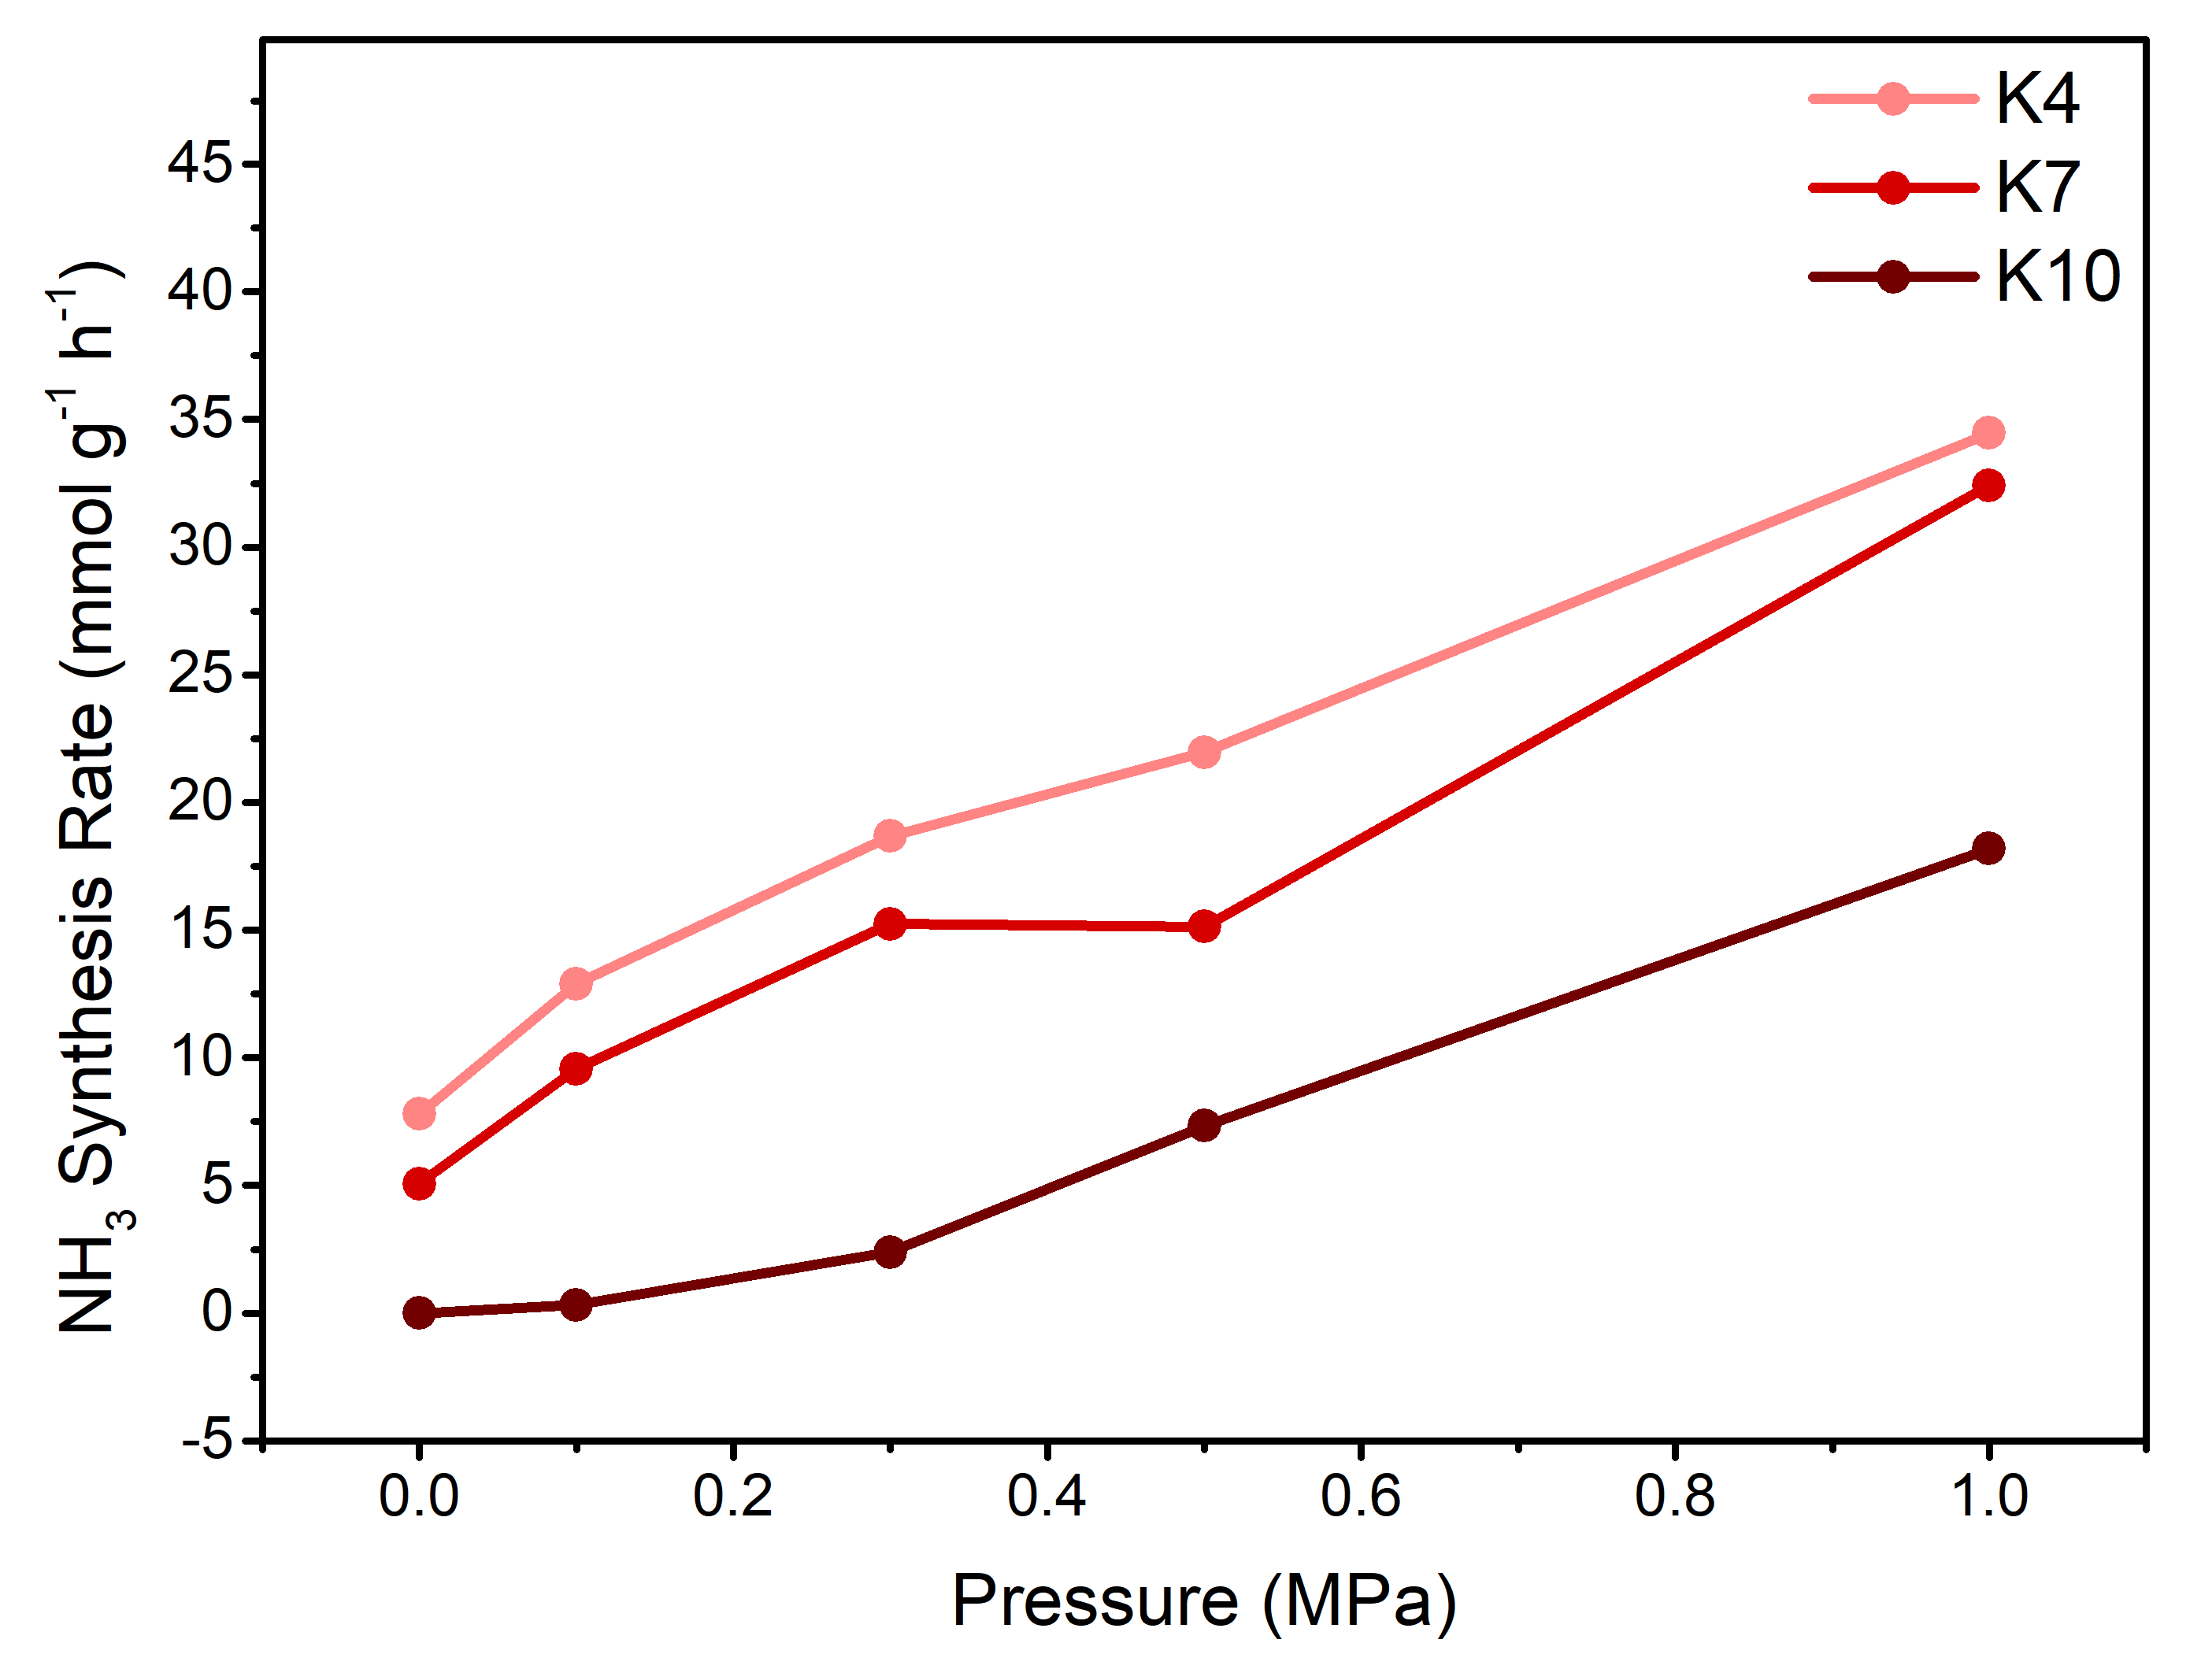


Figure S4 Catalytic activity test of Ru/K/LCO with different promoter loading (a) Pressure dependence of the ammonia synthesis rate at 400 °C. (b) Temperature dependence of the ammonia synthesis rate at 1 MPa, each of which had been reduced at 450 °C.


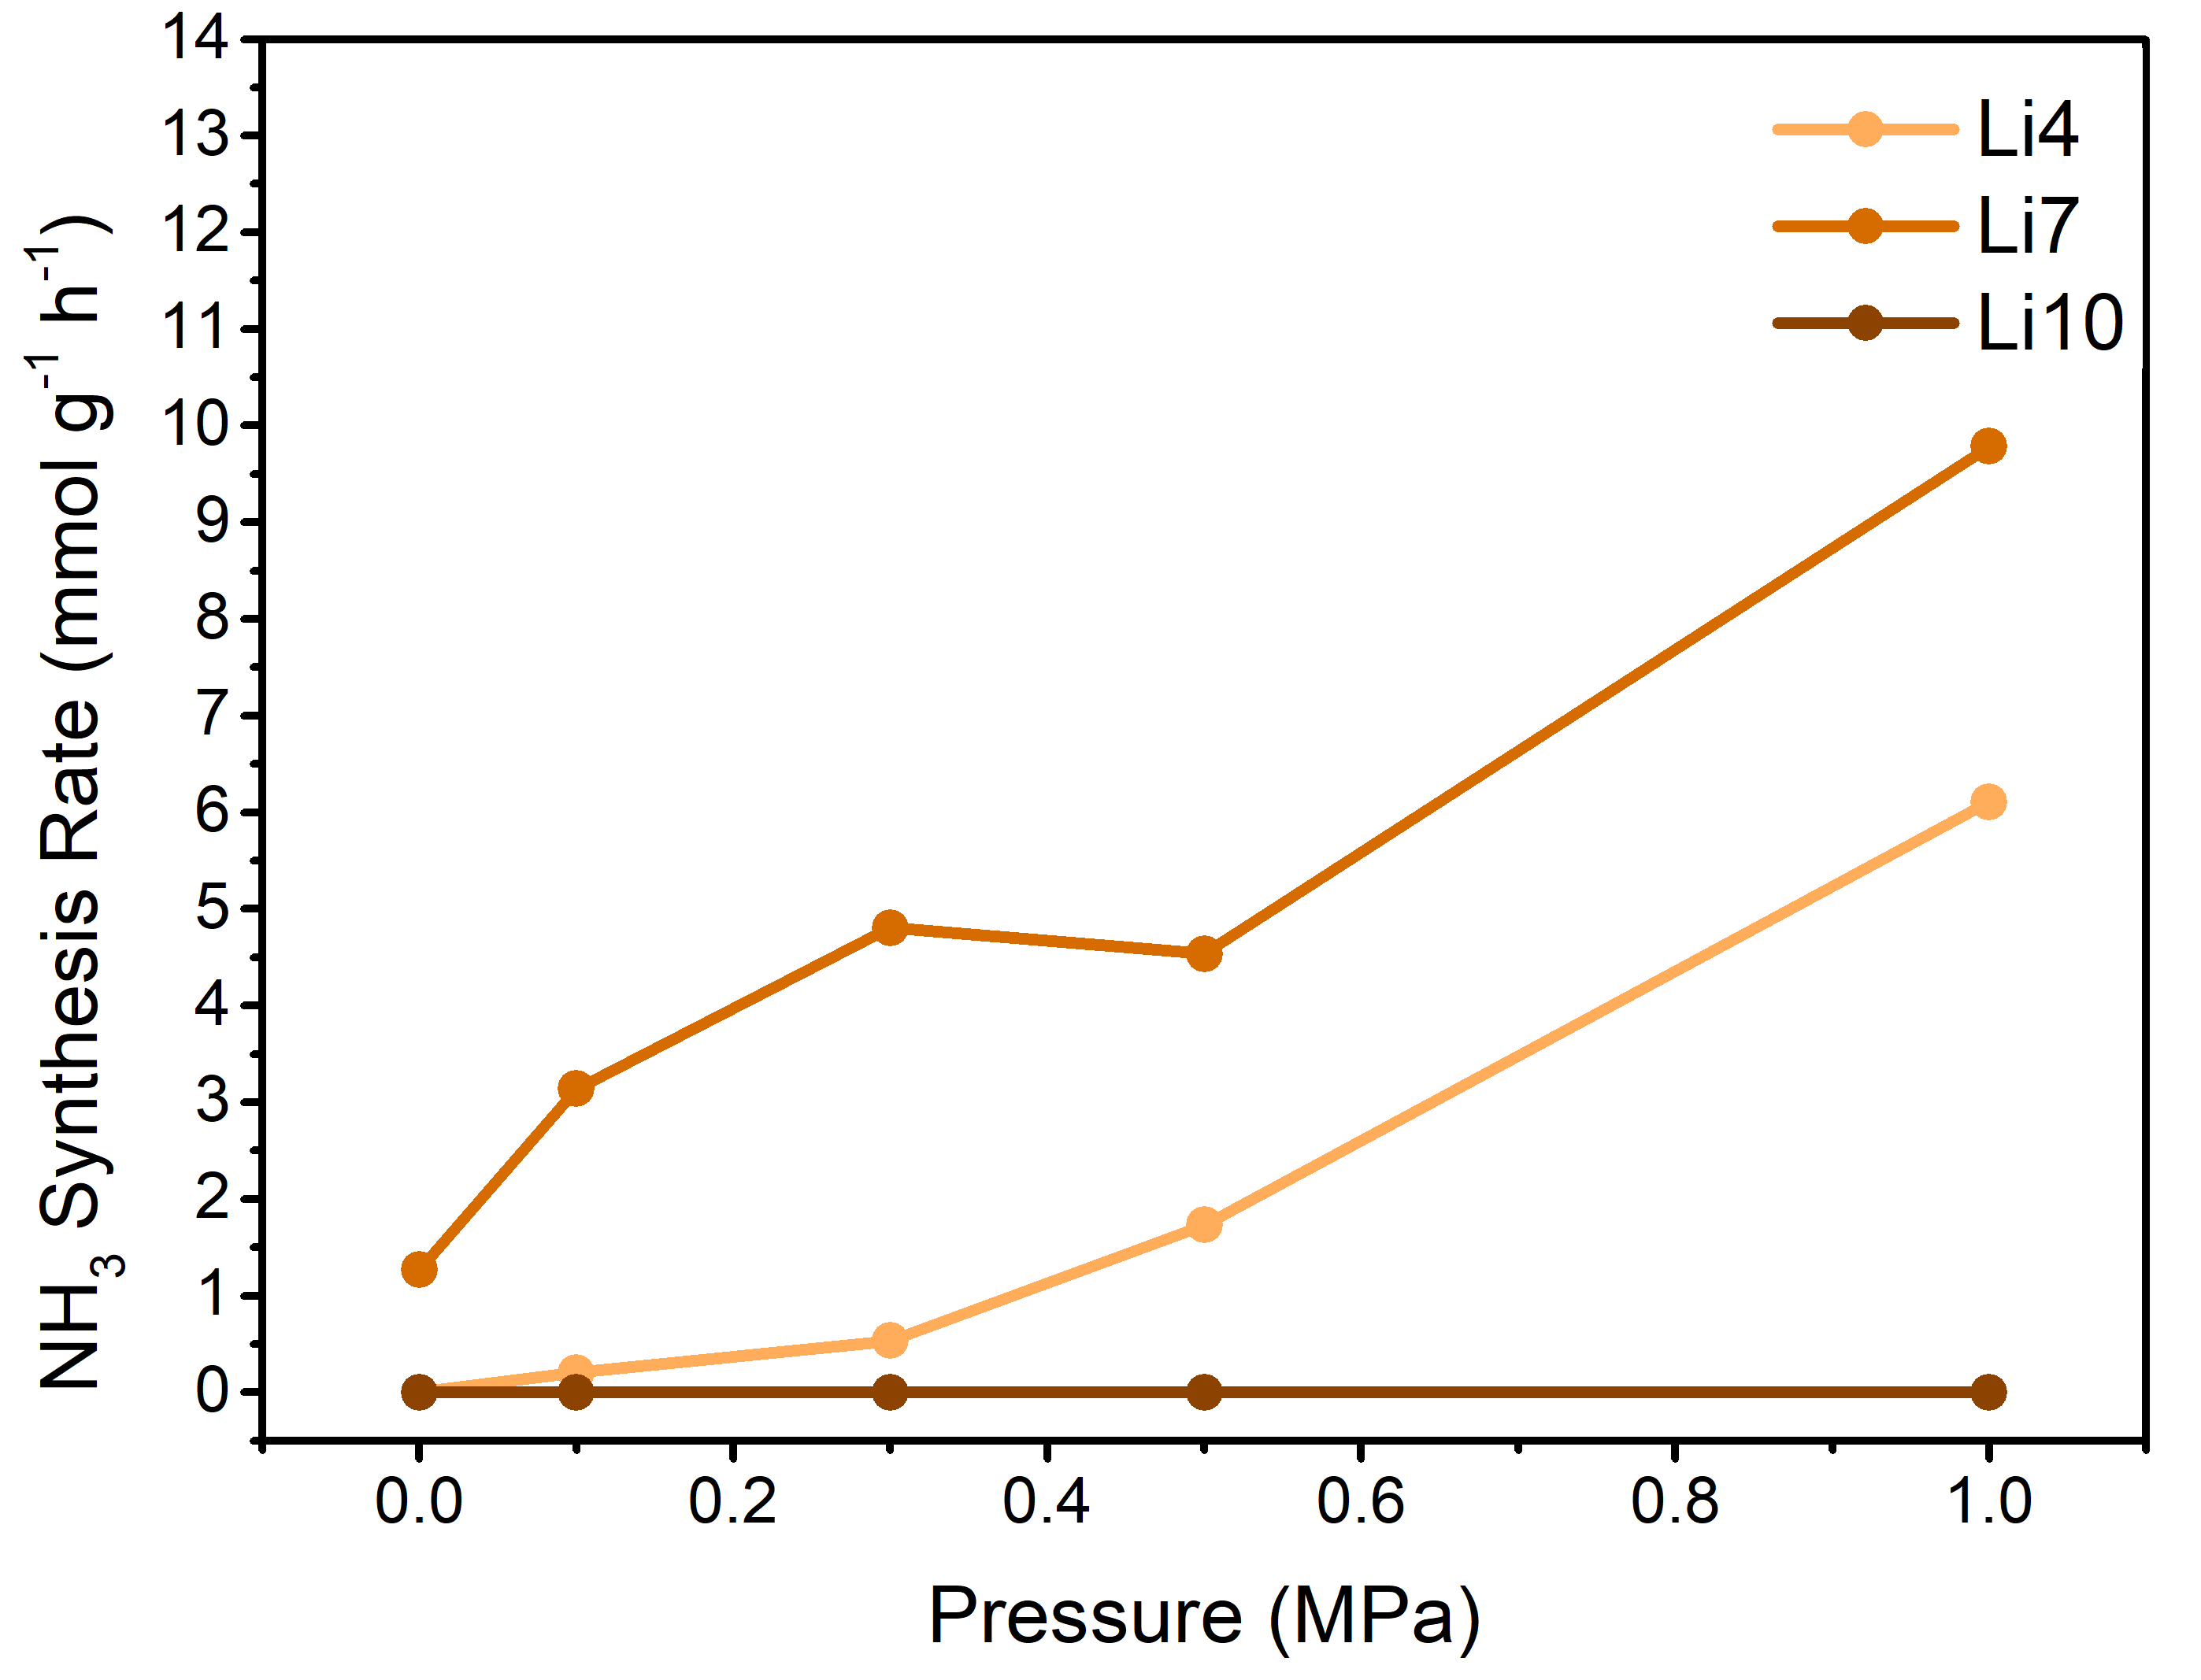

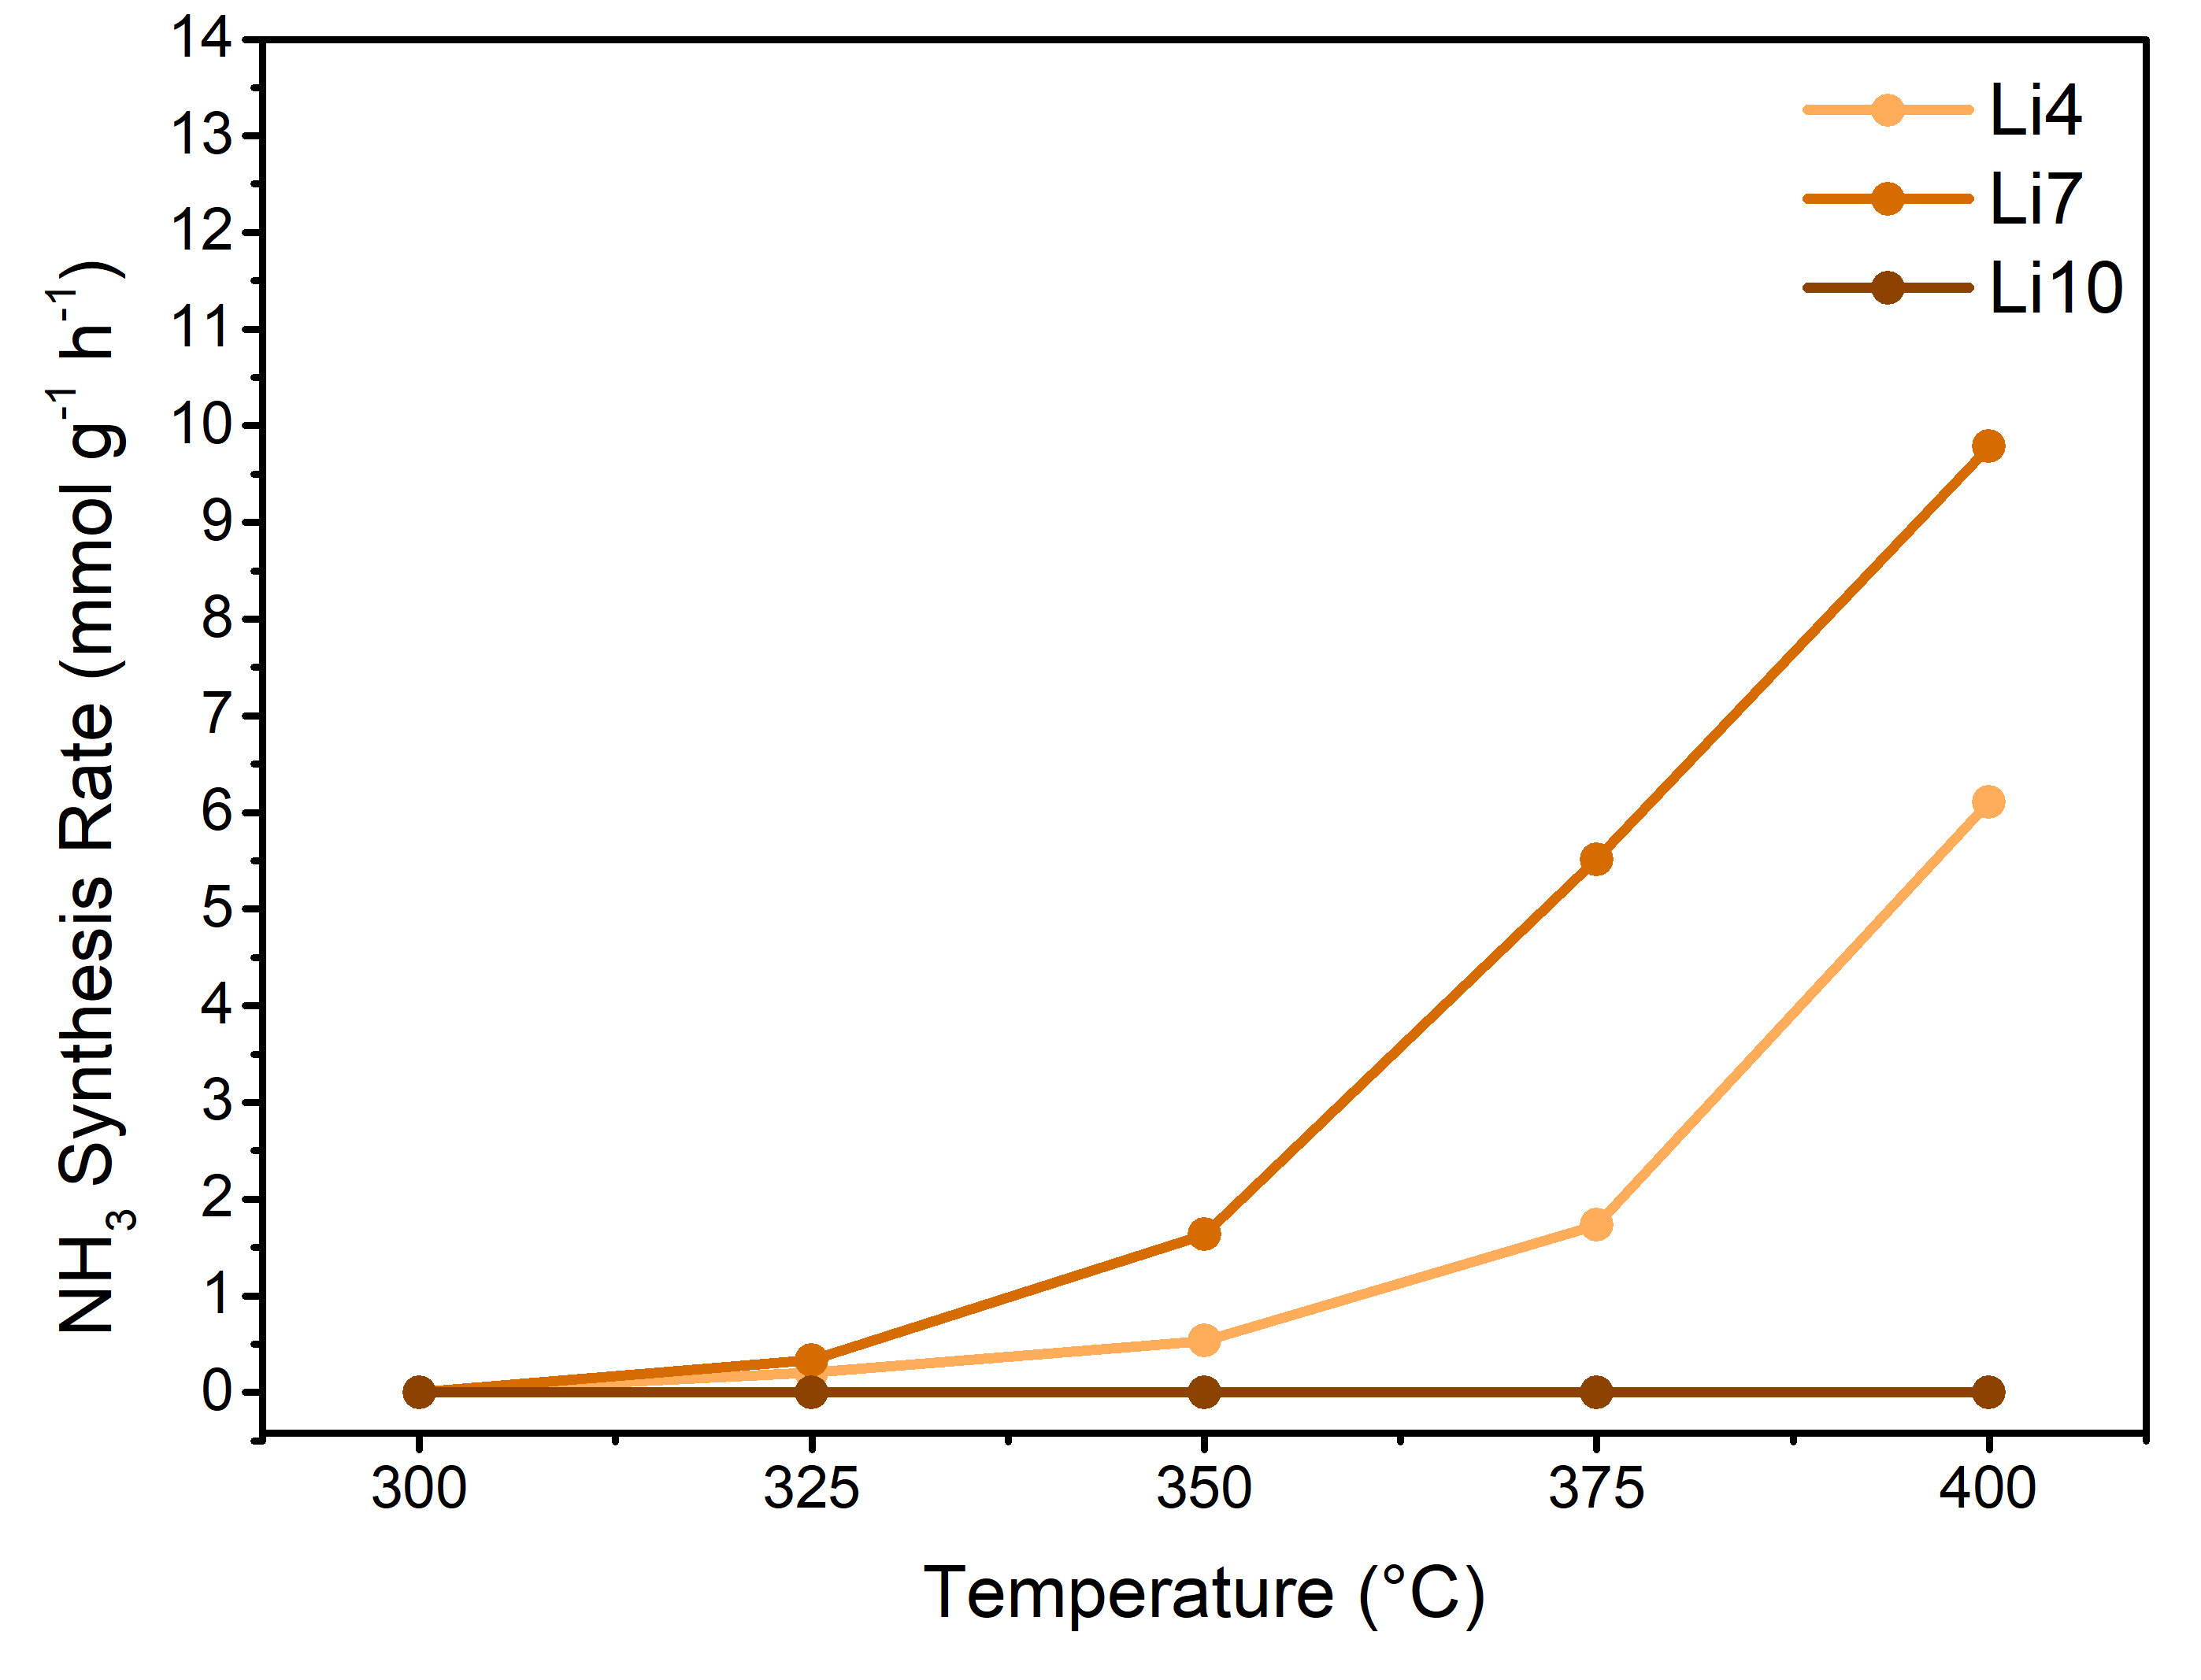


Figure S5. Catalytic activity test of Ru/K/LCO with different promoter loading (a) Pressure dependence of the ammonia synthesis rate at 400 °C. (b) Temperature dependence of the ammonia synthesis rate at 1 MPa, each of which had been reduced at 450 °C.


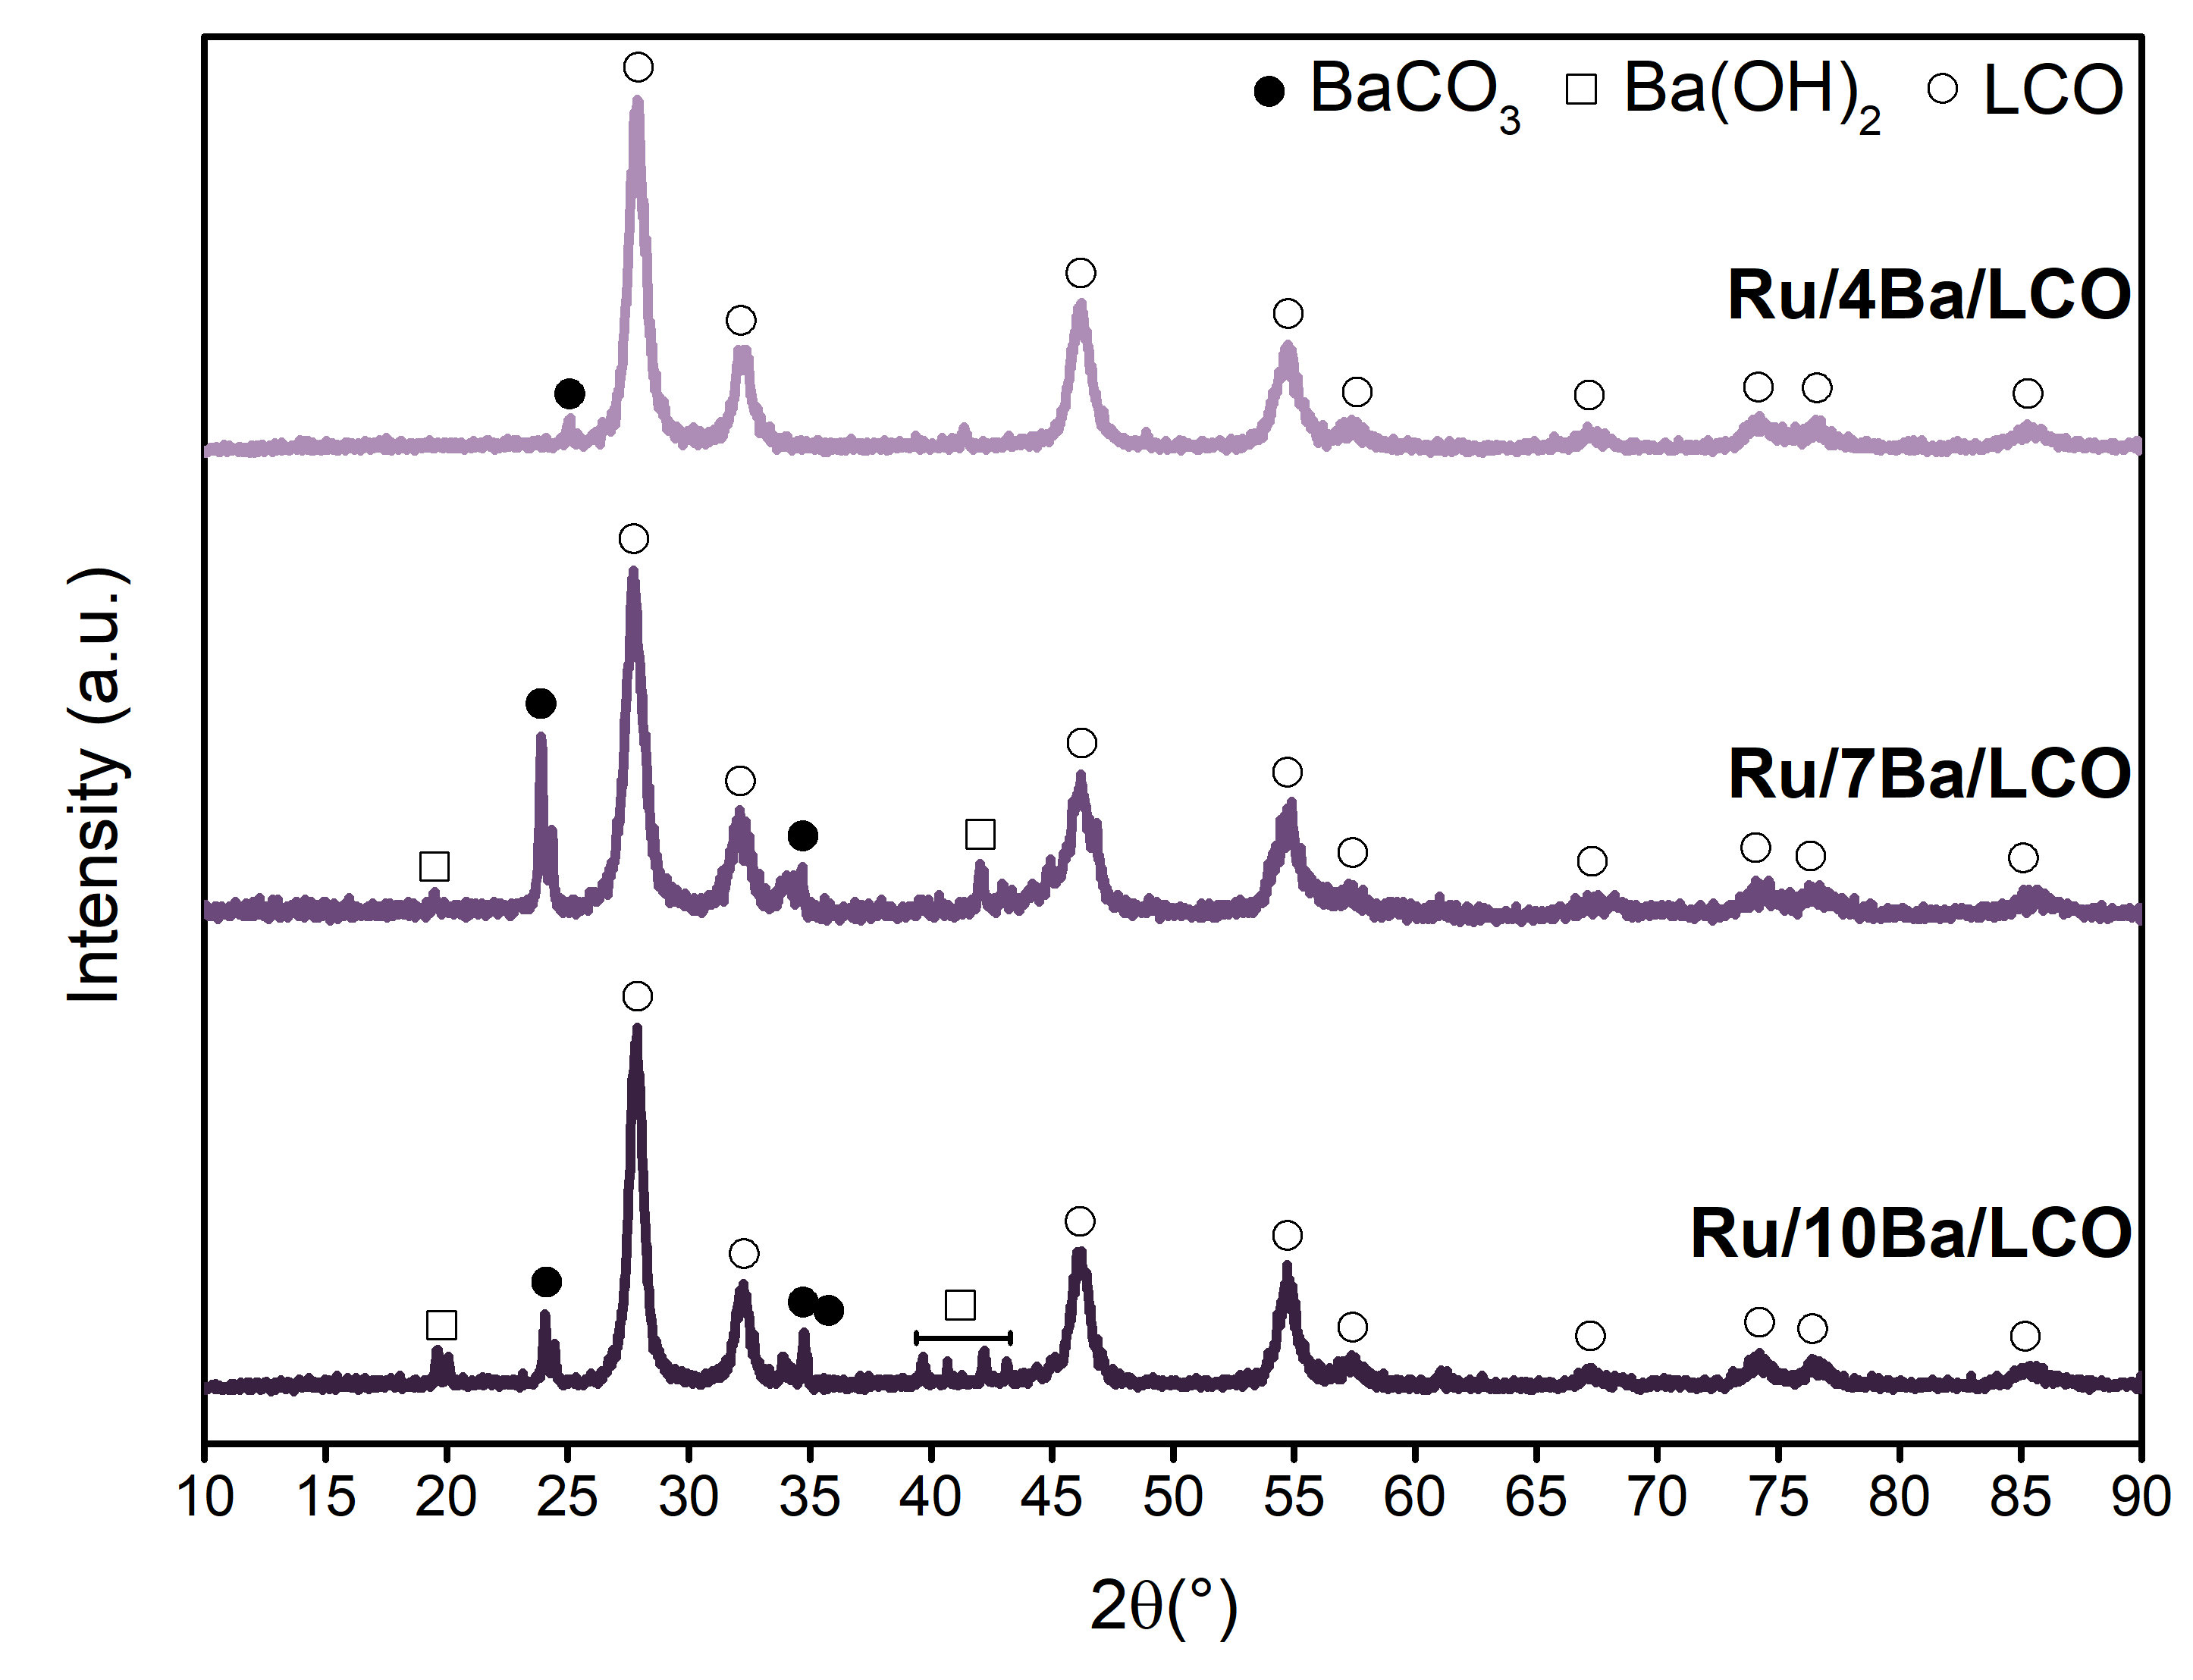


Figure S6. X-ray diffraction patterns of Ru/Ba/LCO with different promoter compositions.


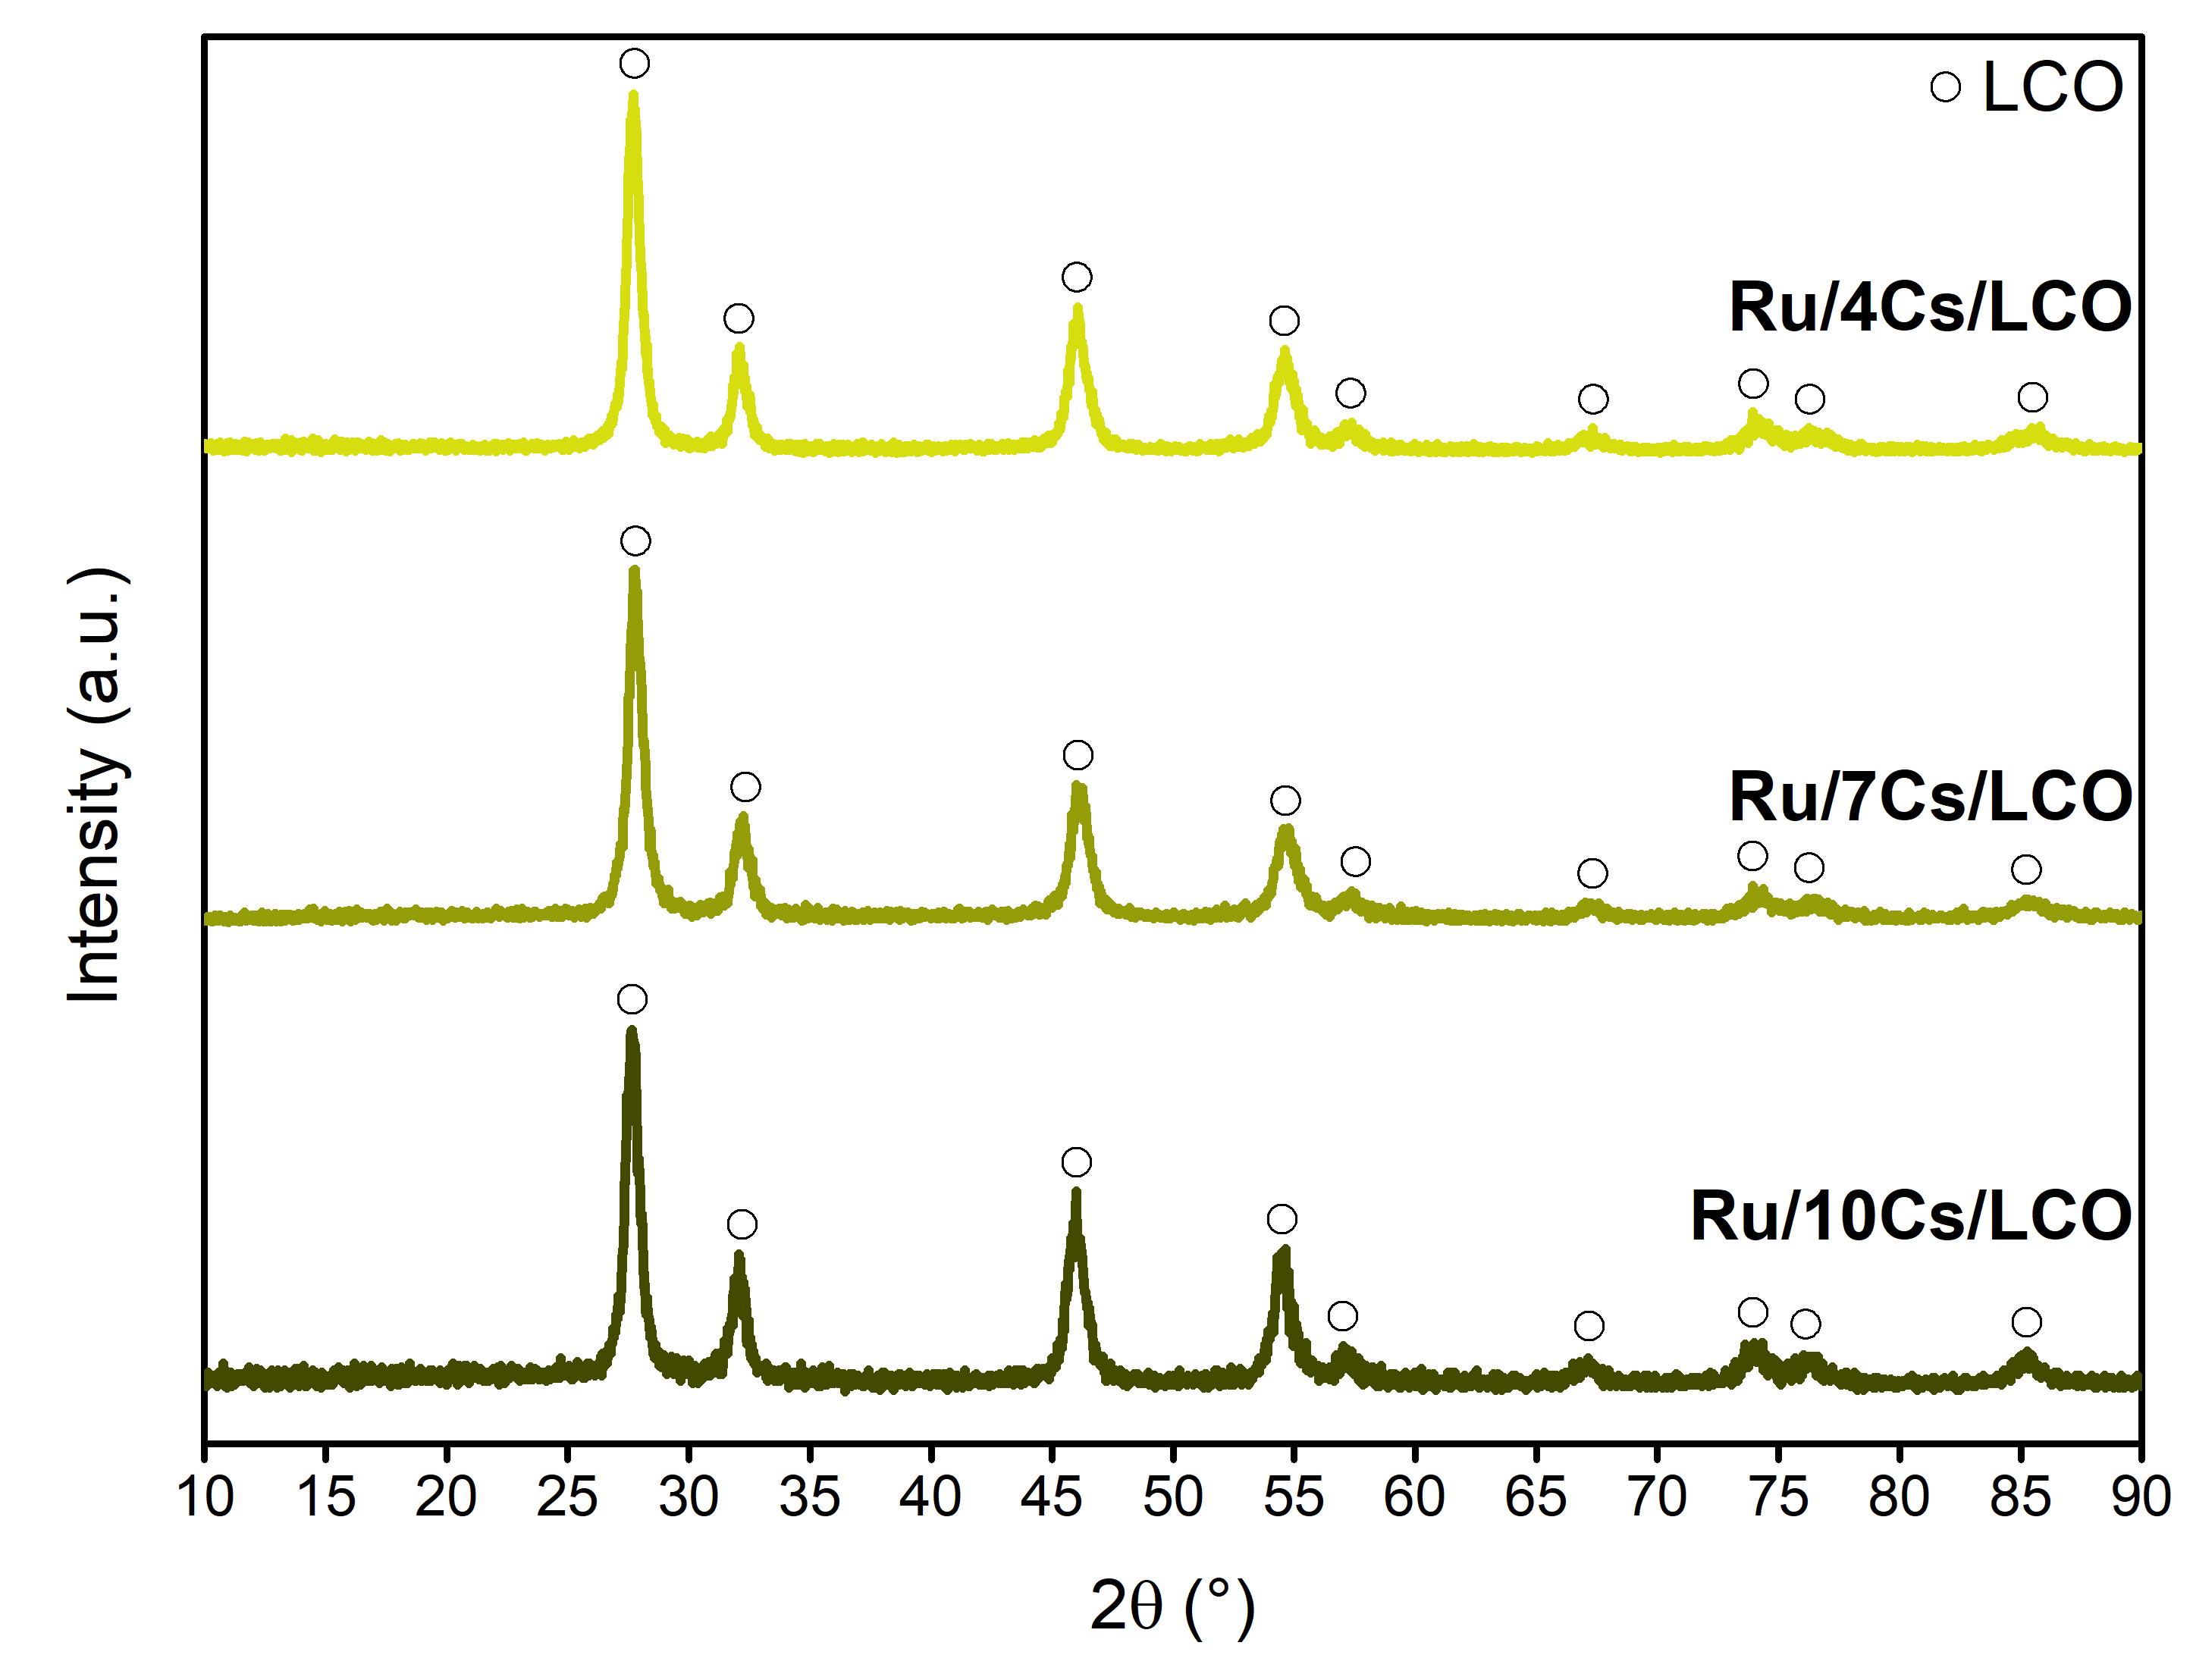


Figure S7. X-ray diffraction patterns of Ru/Cs/LCO with different promoter compositions.


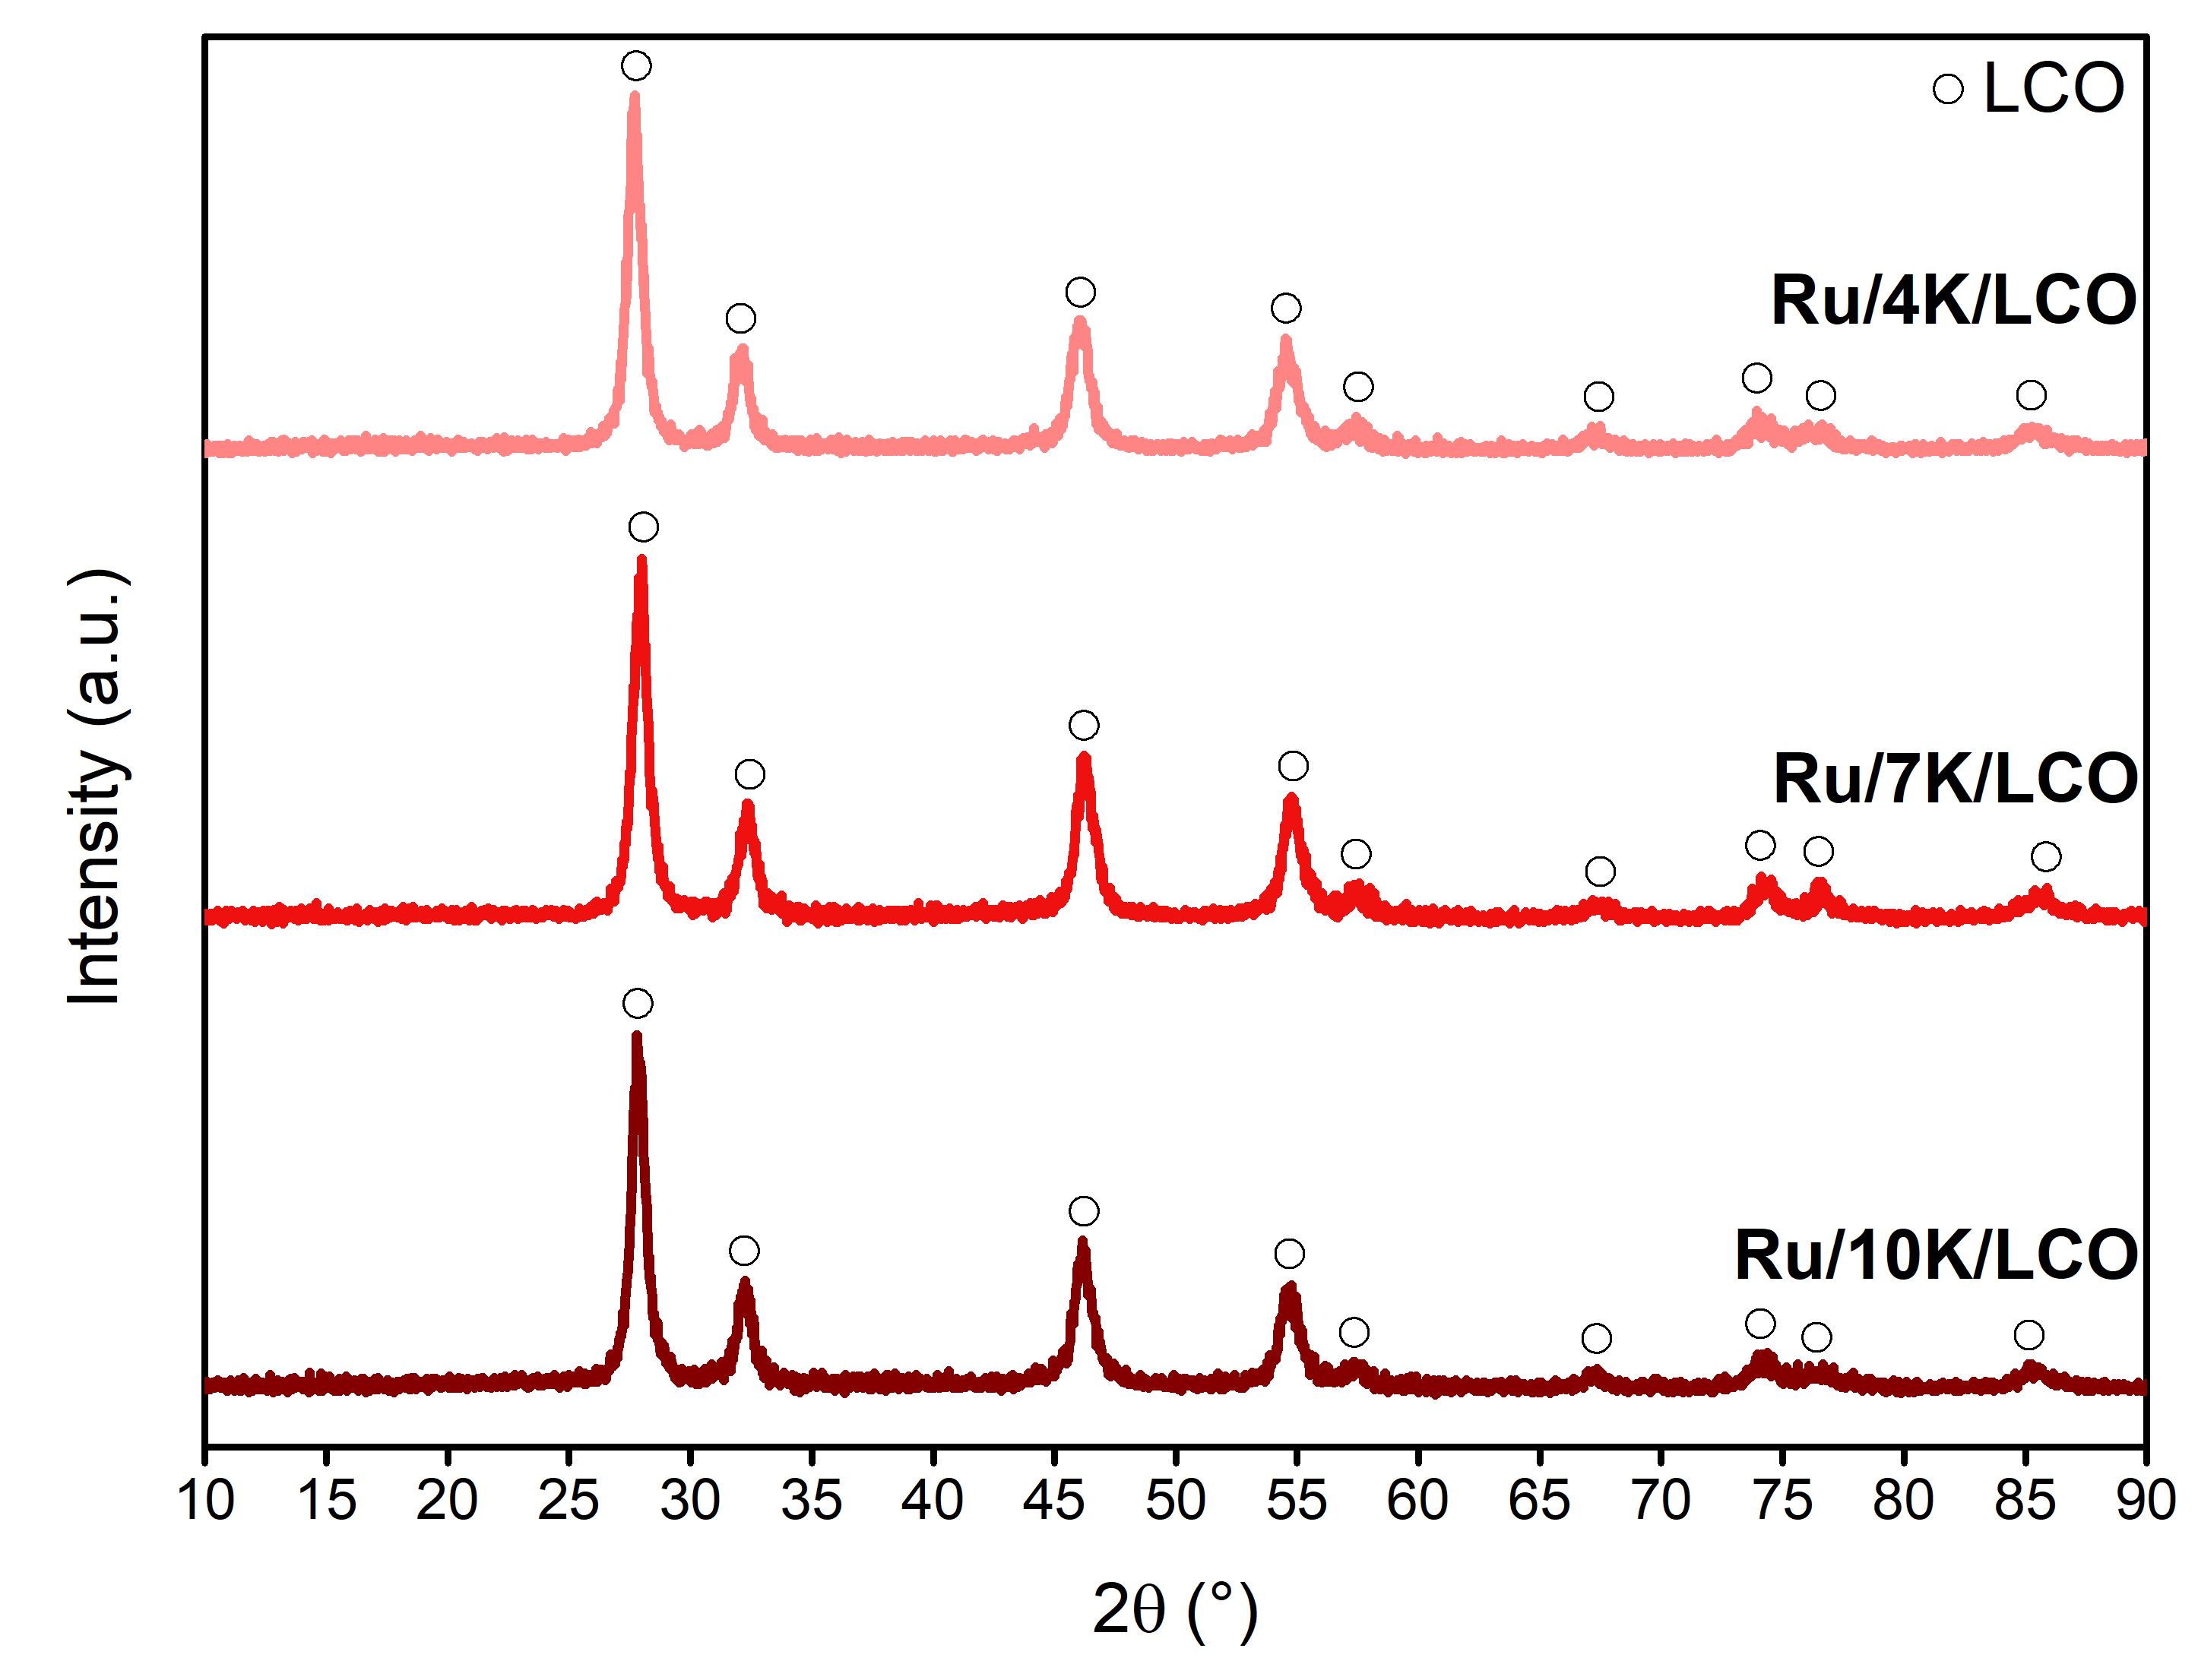


Figure S8. X-ray diffraction patterns of Ru/K/LCO with different promoter compositions.


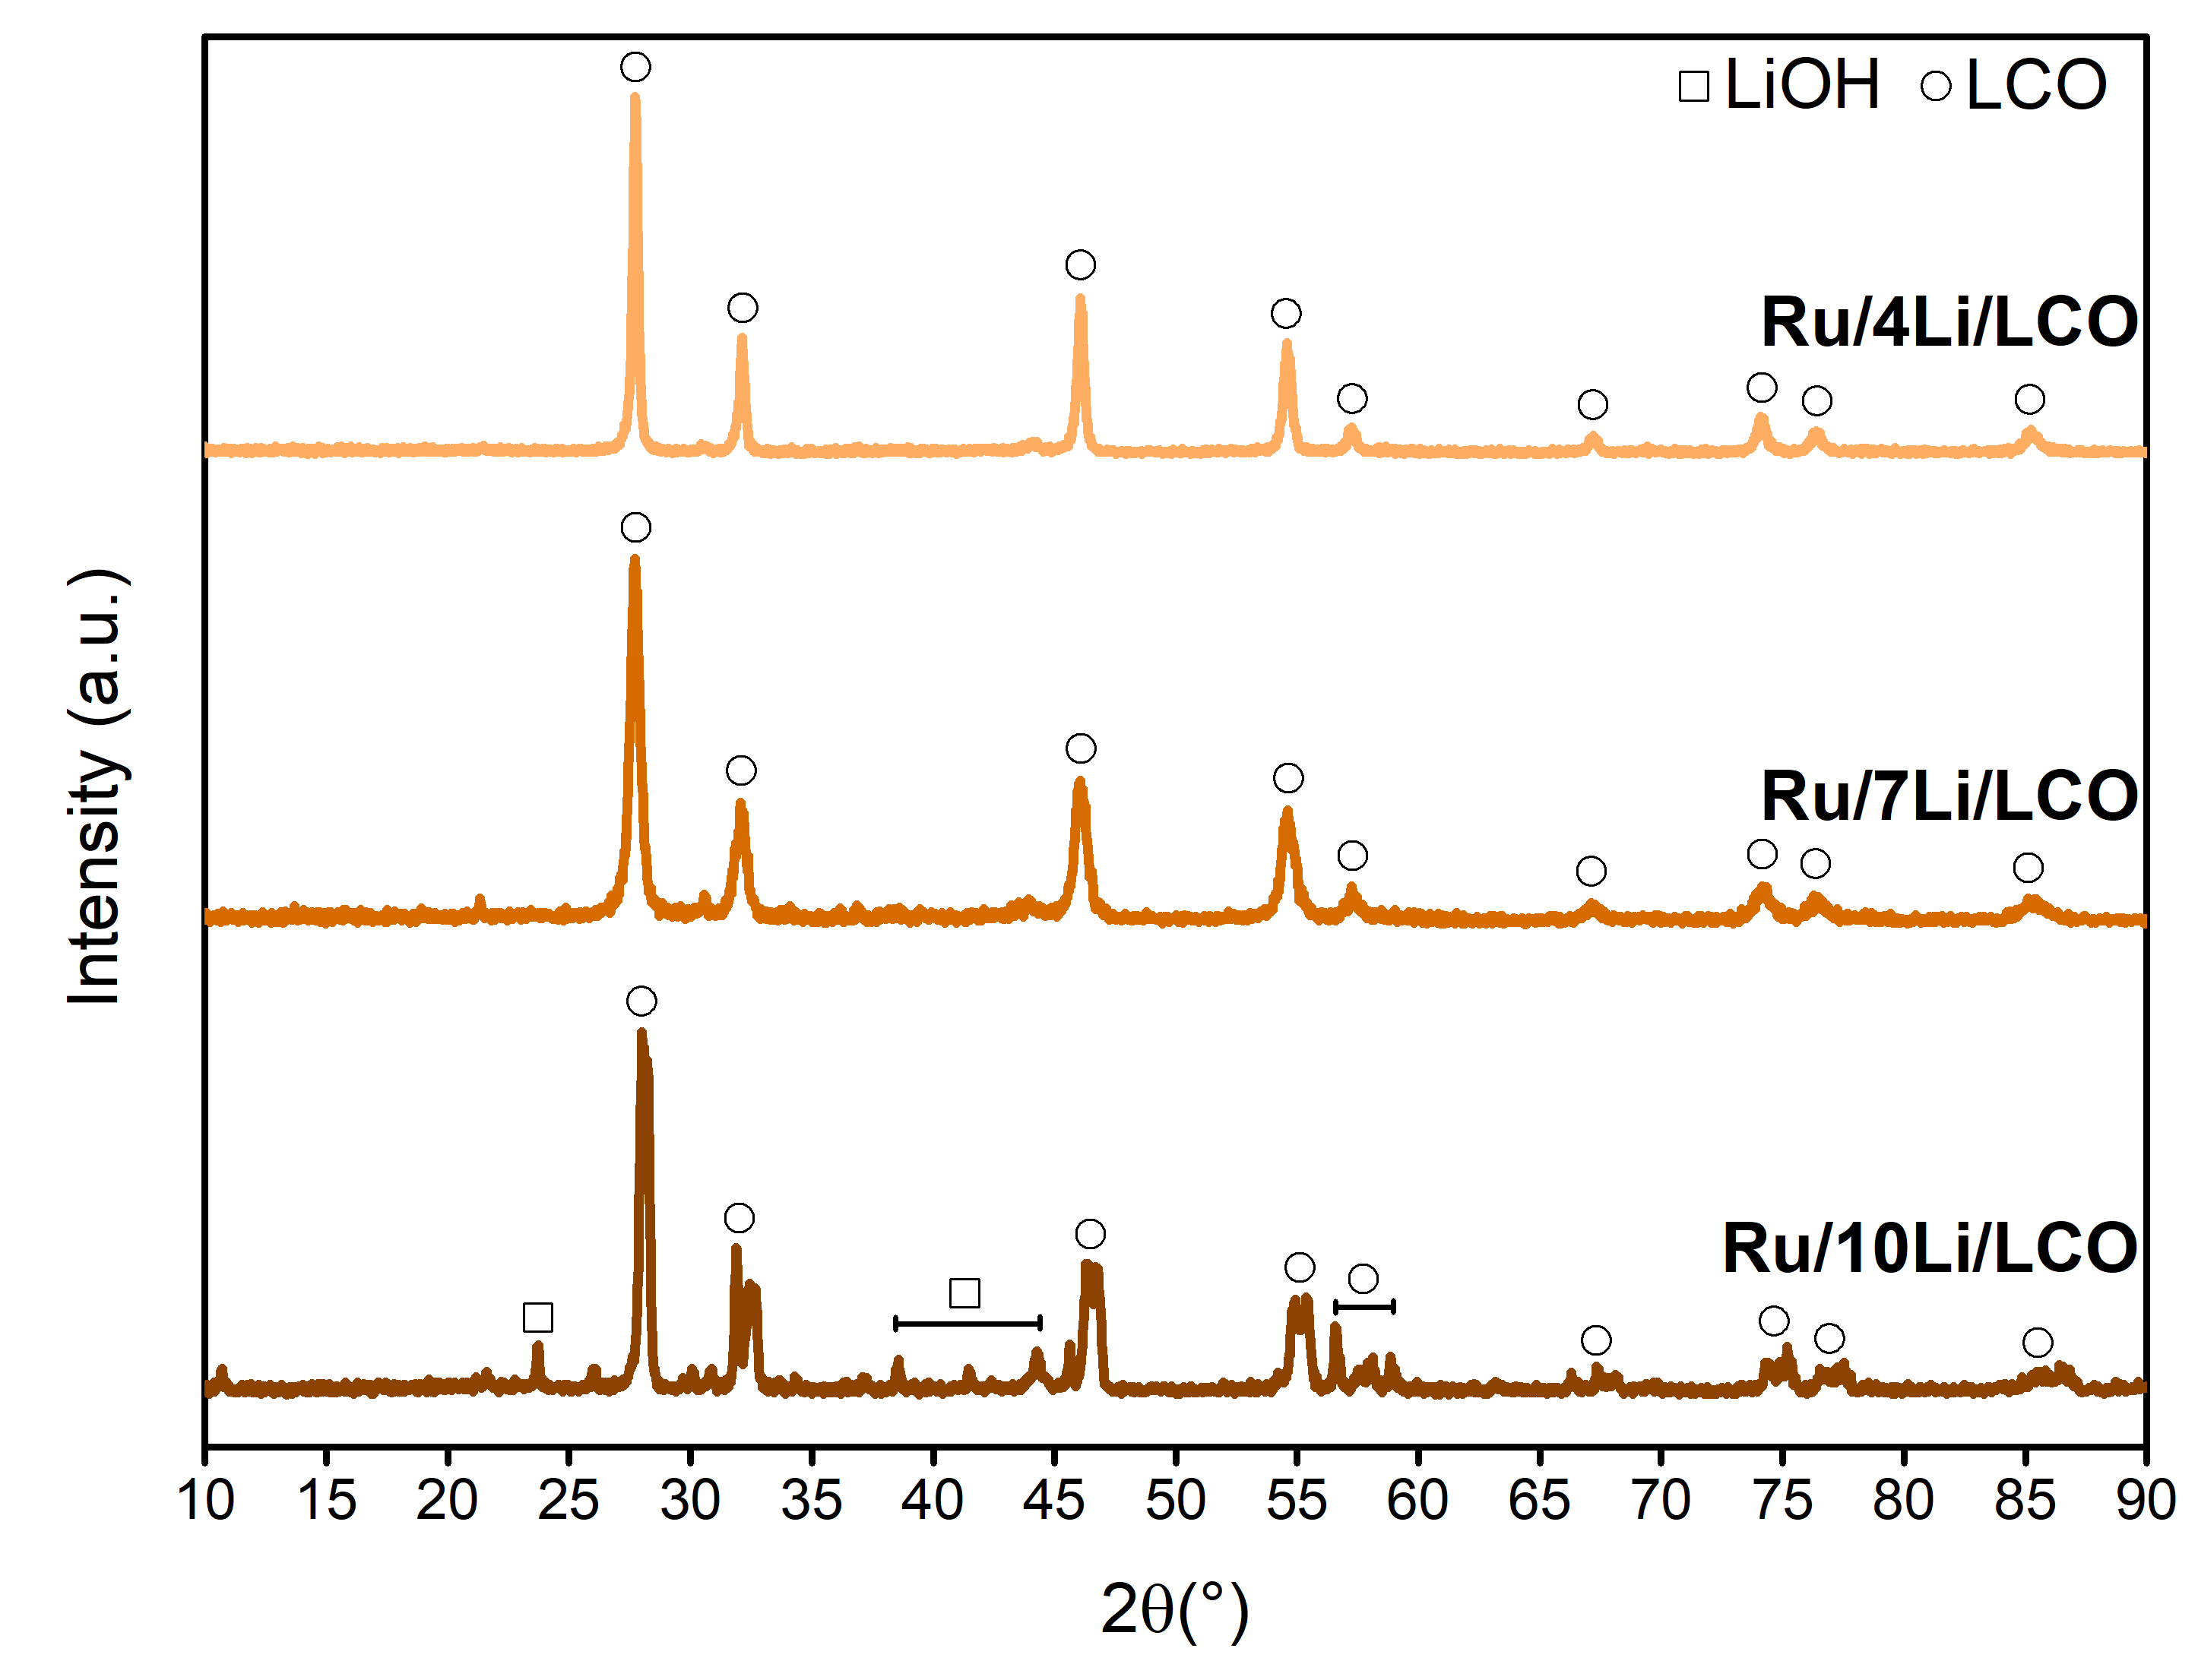


Figure S9. X-ray diffraction patterns of Ru/Li/LCO with different promoter compositions.

Figure S10. NH3 – synthesis rate correlation with Ru dispersion for Ru/Ba/LCO

Figure S11. NH3 – synthesis rate correlation with Ru dispersion for Ru/Cs/LCO

Figure S12. NH3 – synthesis rate correlation with Ru dispersion for Ru/K/LCO

Figure S13. NH3 – synthesis rate correlation with Ru dispersion for Ru/Li/LCO

Figure S14. NH3 – synthesis rate correlation with BET surface area for Ru/Ba/LCO

Figure S15. NH3 – synthesis rate correlation with BET surface area for Ru/Cs/LCO

Figure S16. NH3 – synthesis rate correlation with BET surface area for Ru/K/LCO

Figure S17. NH3 – synthesis rate correlation with BET surface area for Ru/Li/LCO


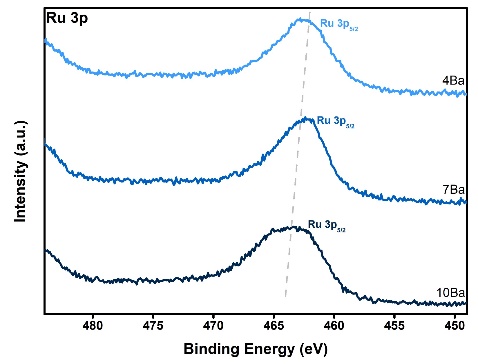

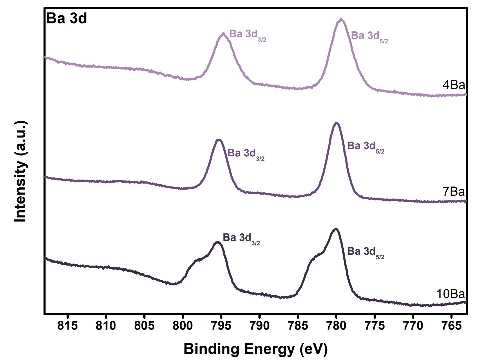

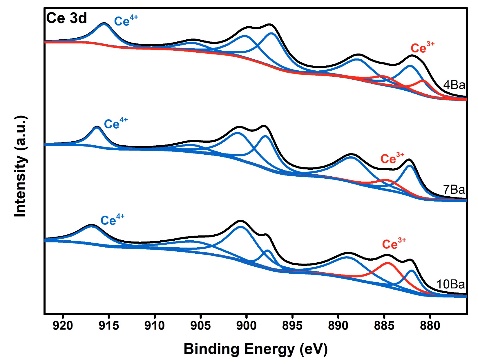

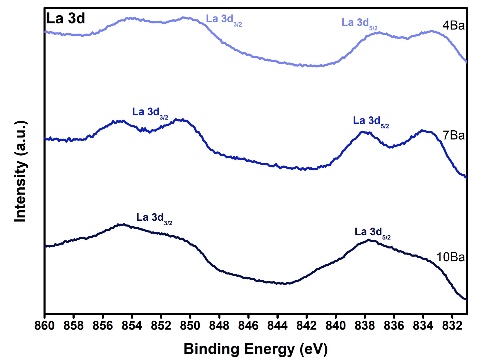

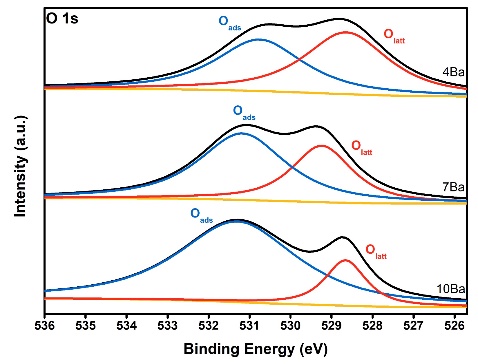

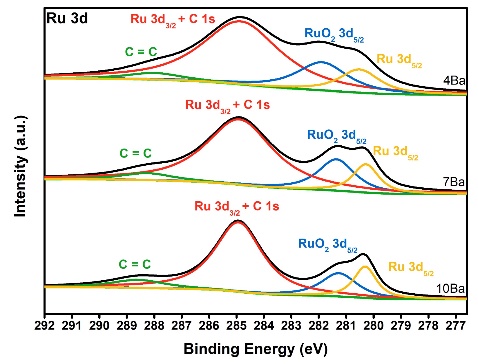


Figure S18. XPS Spectra of Ru/Ba/LCO with different promoter loading


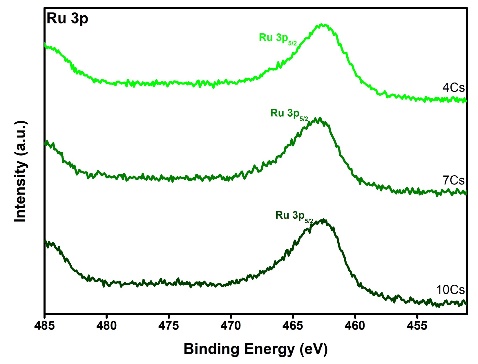

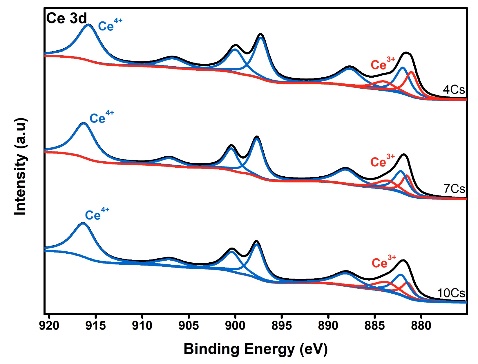

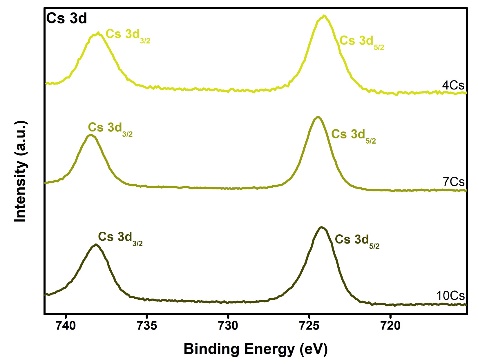

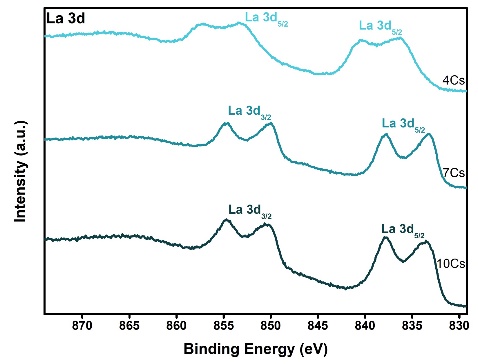

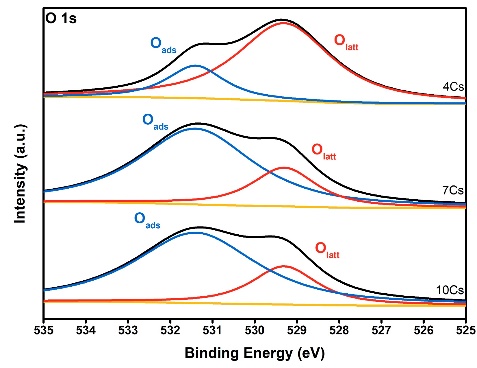

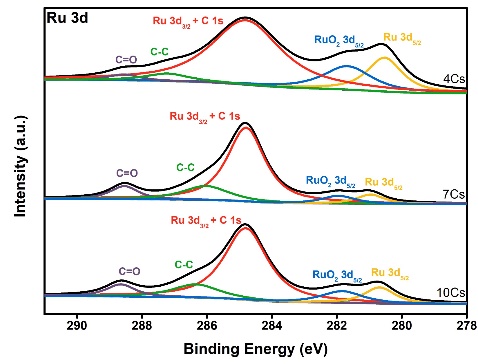


Figure S19. XPS Spectra of Ru/Cs/LCO with different promoter loading


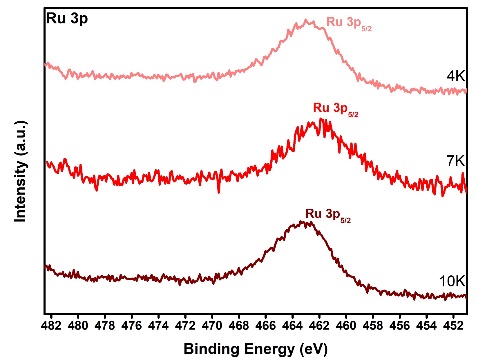

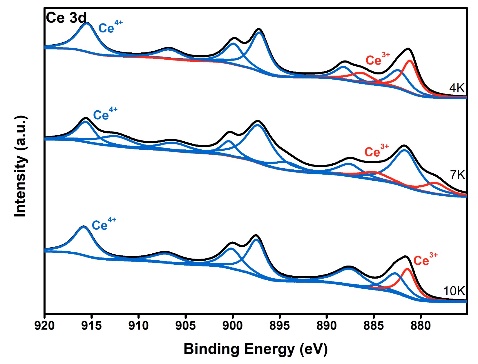

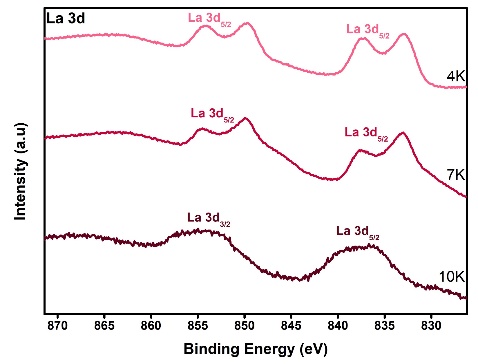

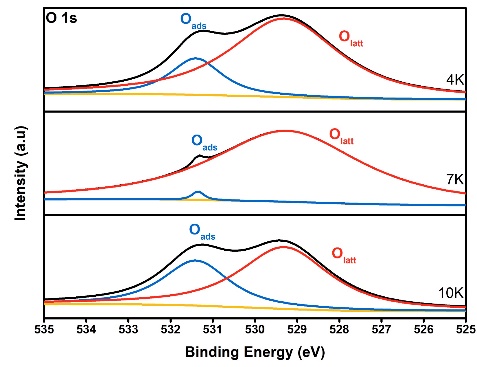

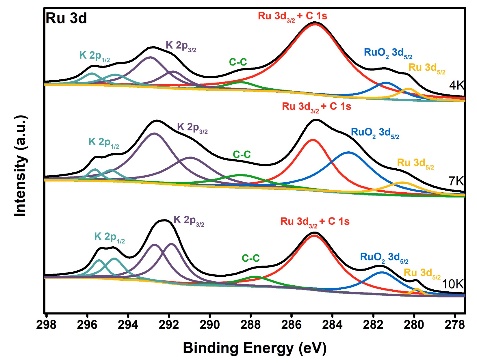


Figure S20. XPS Spectra of Ru/K/LCO with different promoter loading


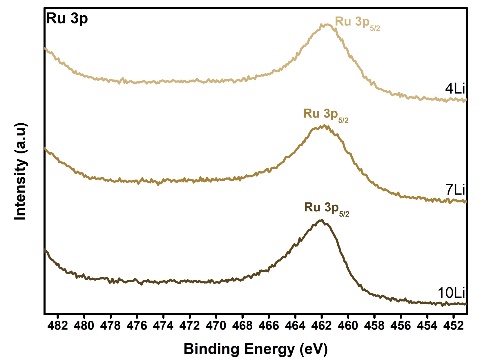

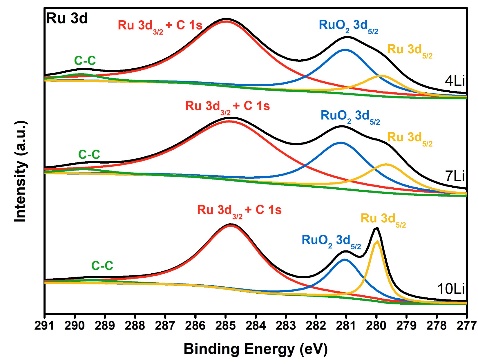

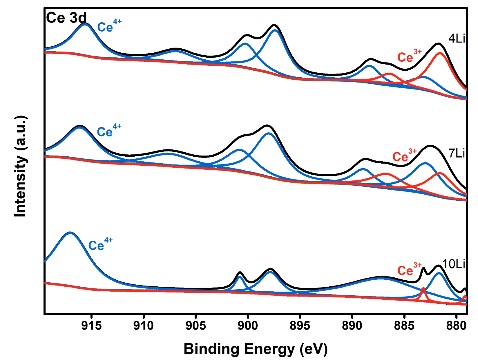

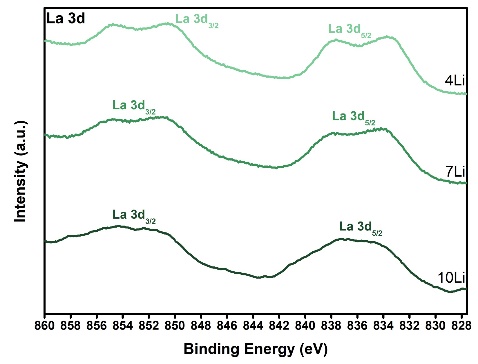

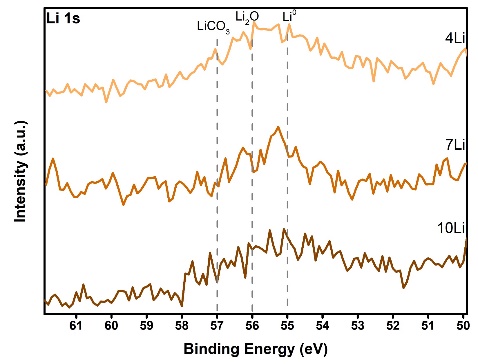

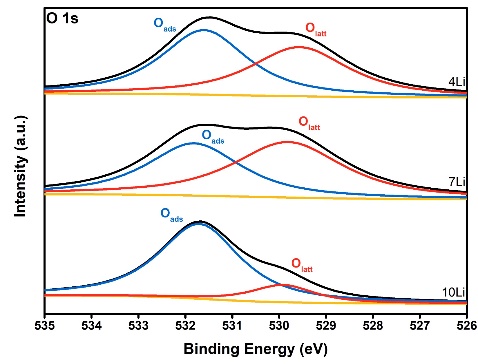


Figure S21. XPS Spectra of Ru/Li/LCO with different promoter loading

**NH3-synthesis rate calculation**

The catalyst performance was evaluated in 300-400 °C at a gas flowrate of 90 sccm. The outlet NH3 was captured by a known amount of diluted H2SO4 solution (0.1 mol L-1), and then, the conductivity values were recorded every 15 seconds by a conductivity benchtop meter (Orion StarTM). The example of NH3- synthesis rate calculation is explained as follows:

Figure S22. H2SO4 conductivity value when measuring NH3-synthesis rate at 400 °C and 0.5 MPa.

Figure S23. H2SO4 conductivity value when calibrated using NH3 solution

We first plot the change of conductivity by time. The reaction rate basically means the change in NH3 concentration inside the H2SO4 solution. Therefore, we can see the correlation between the solution conductivity and NH3 concentration gradient by calibrating the solution using known amount of NH3 solution (Figure S23). The slope of the graph at Figure S23 suggests that:

After that, we can calculate the reaction rate per catalyst mass (in this case, we use 0.1 g catalyst) with equation below:

15.88 mmol/gcatalyst.h

**NH3-synthesis rate calculation**

To confirm the reproducibility of our activity test method for a catalyst, we conducted the experiment twice using the catalyst at 4% promoter loading and no promoter, and calculated the error bars to indicate the extent of reproducibility.


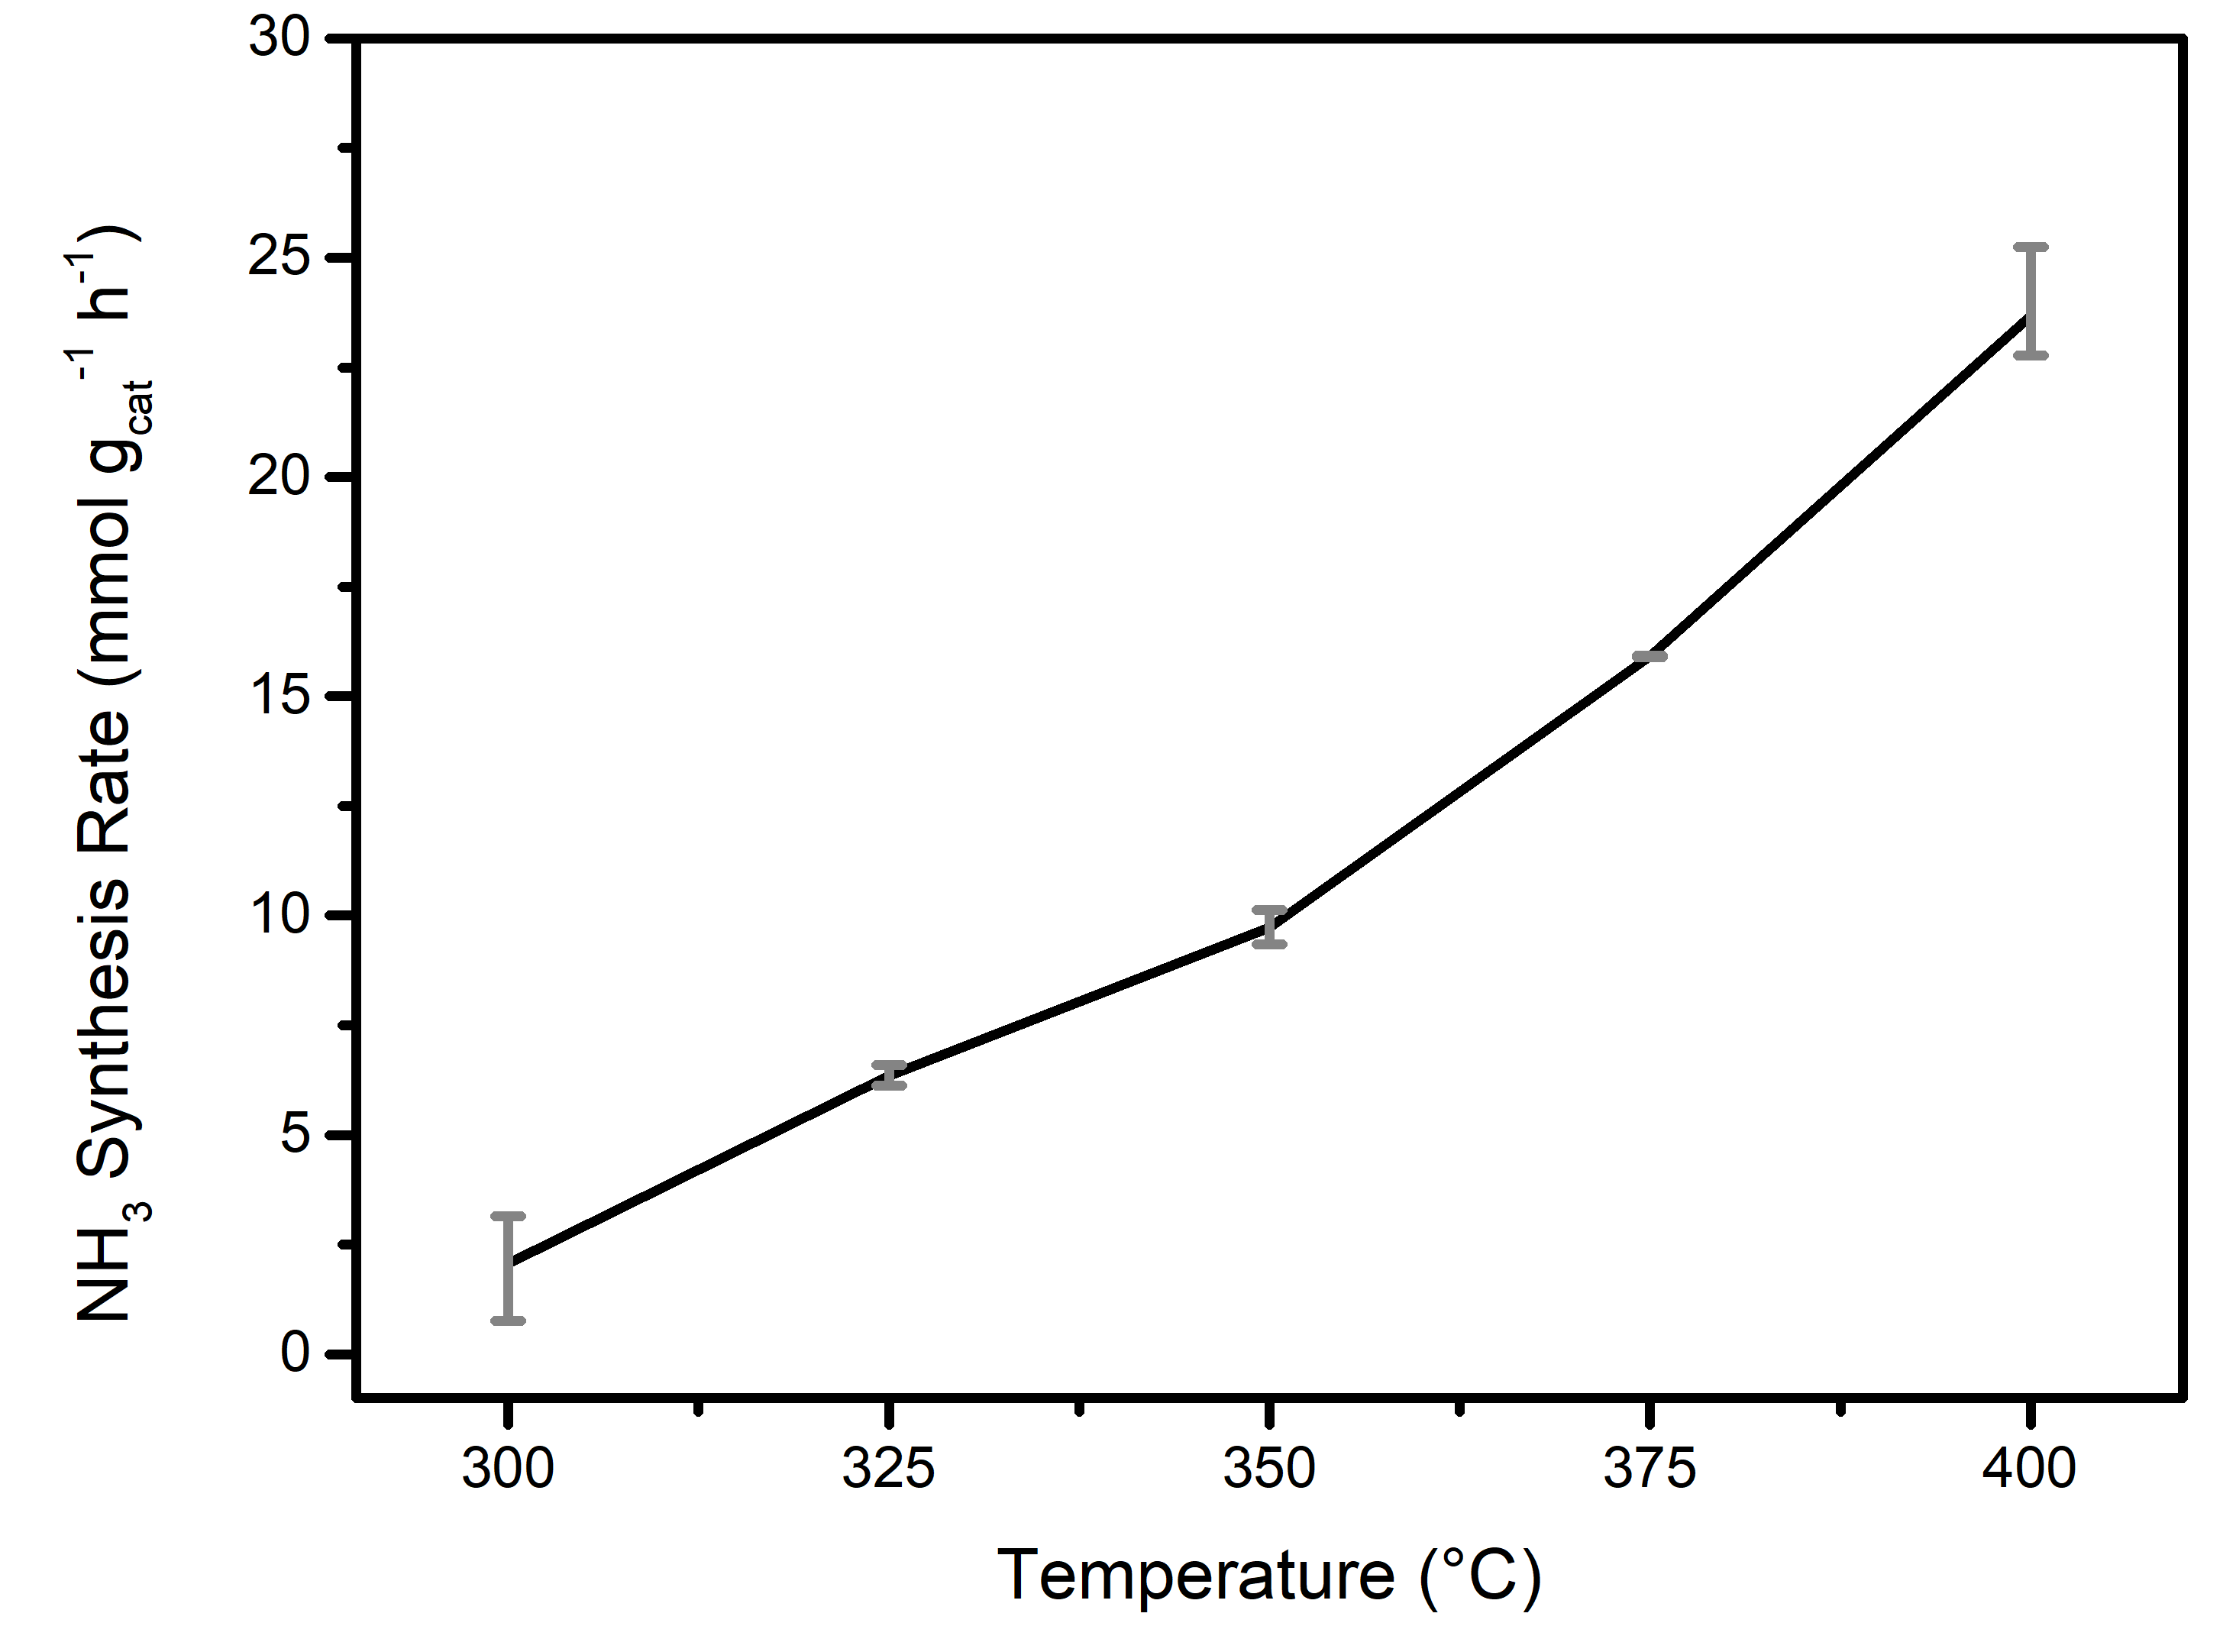

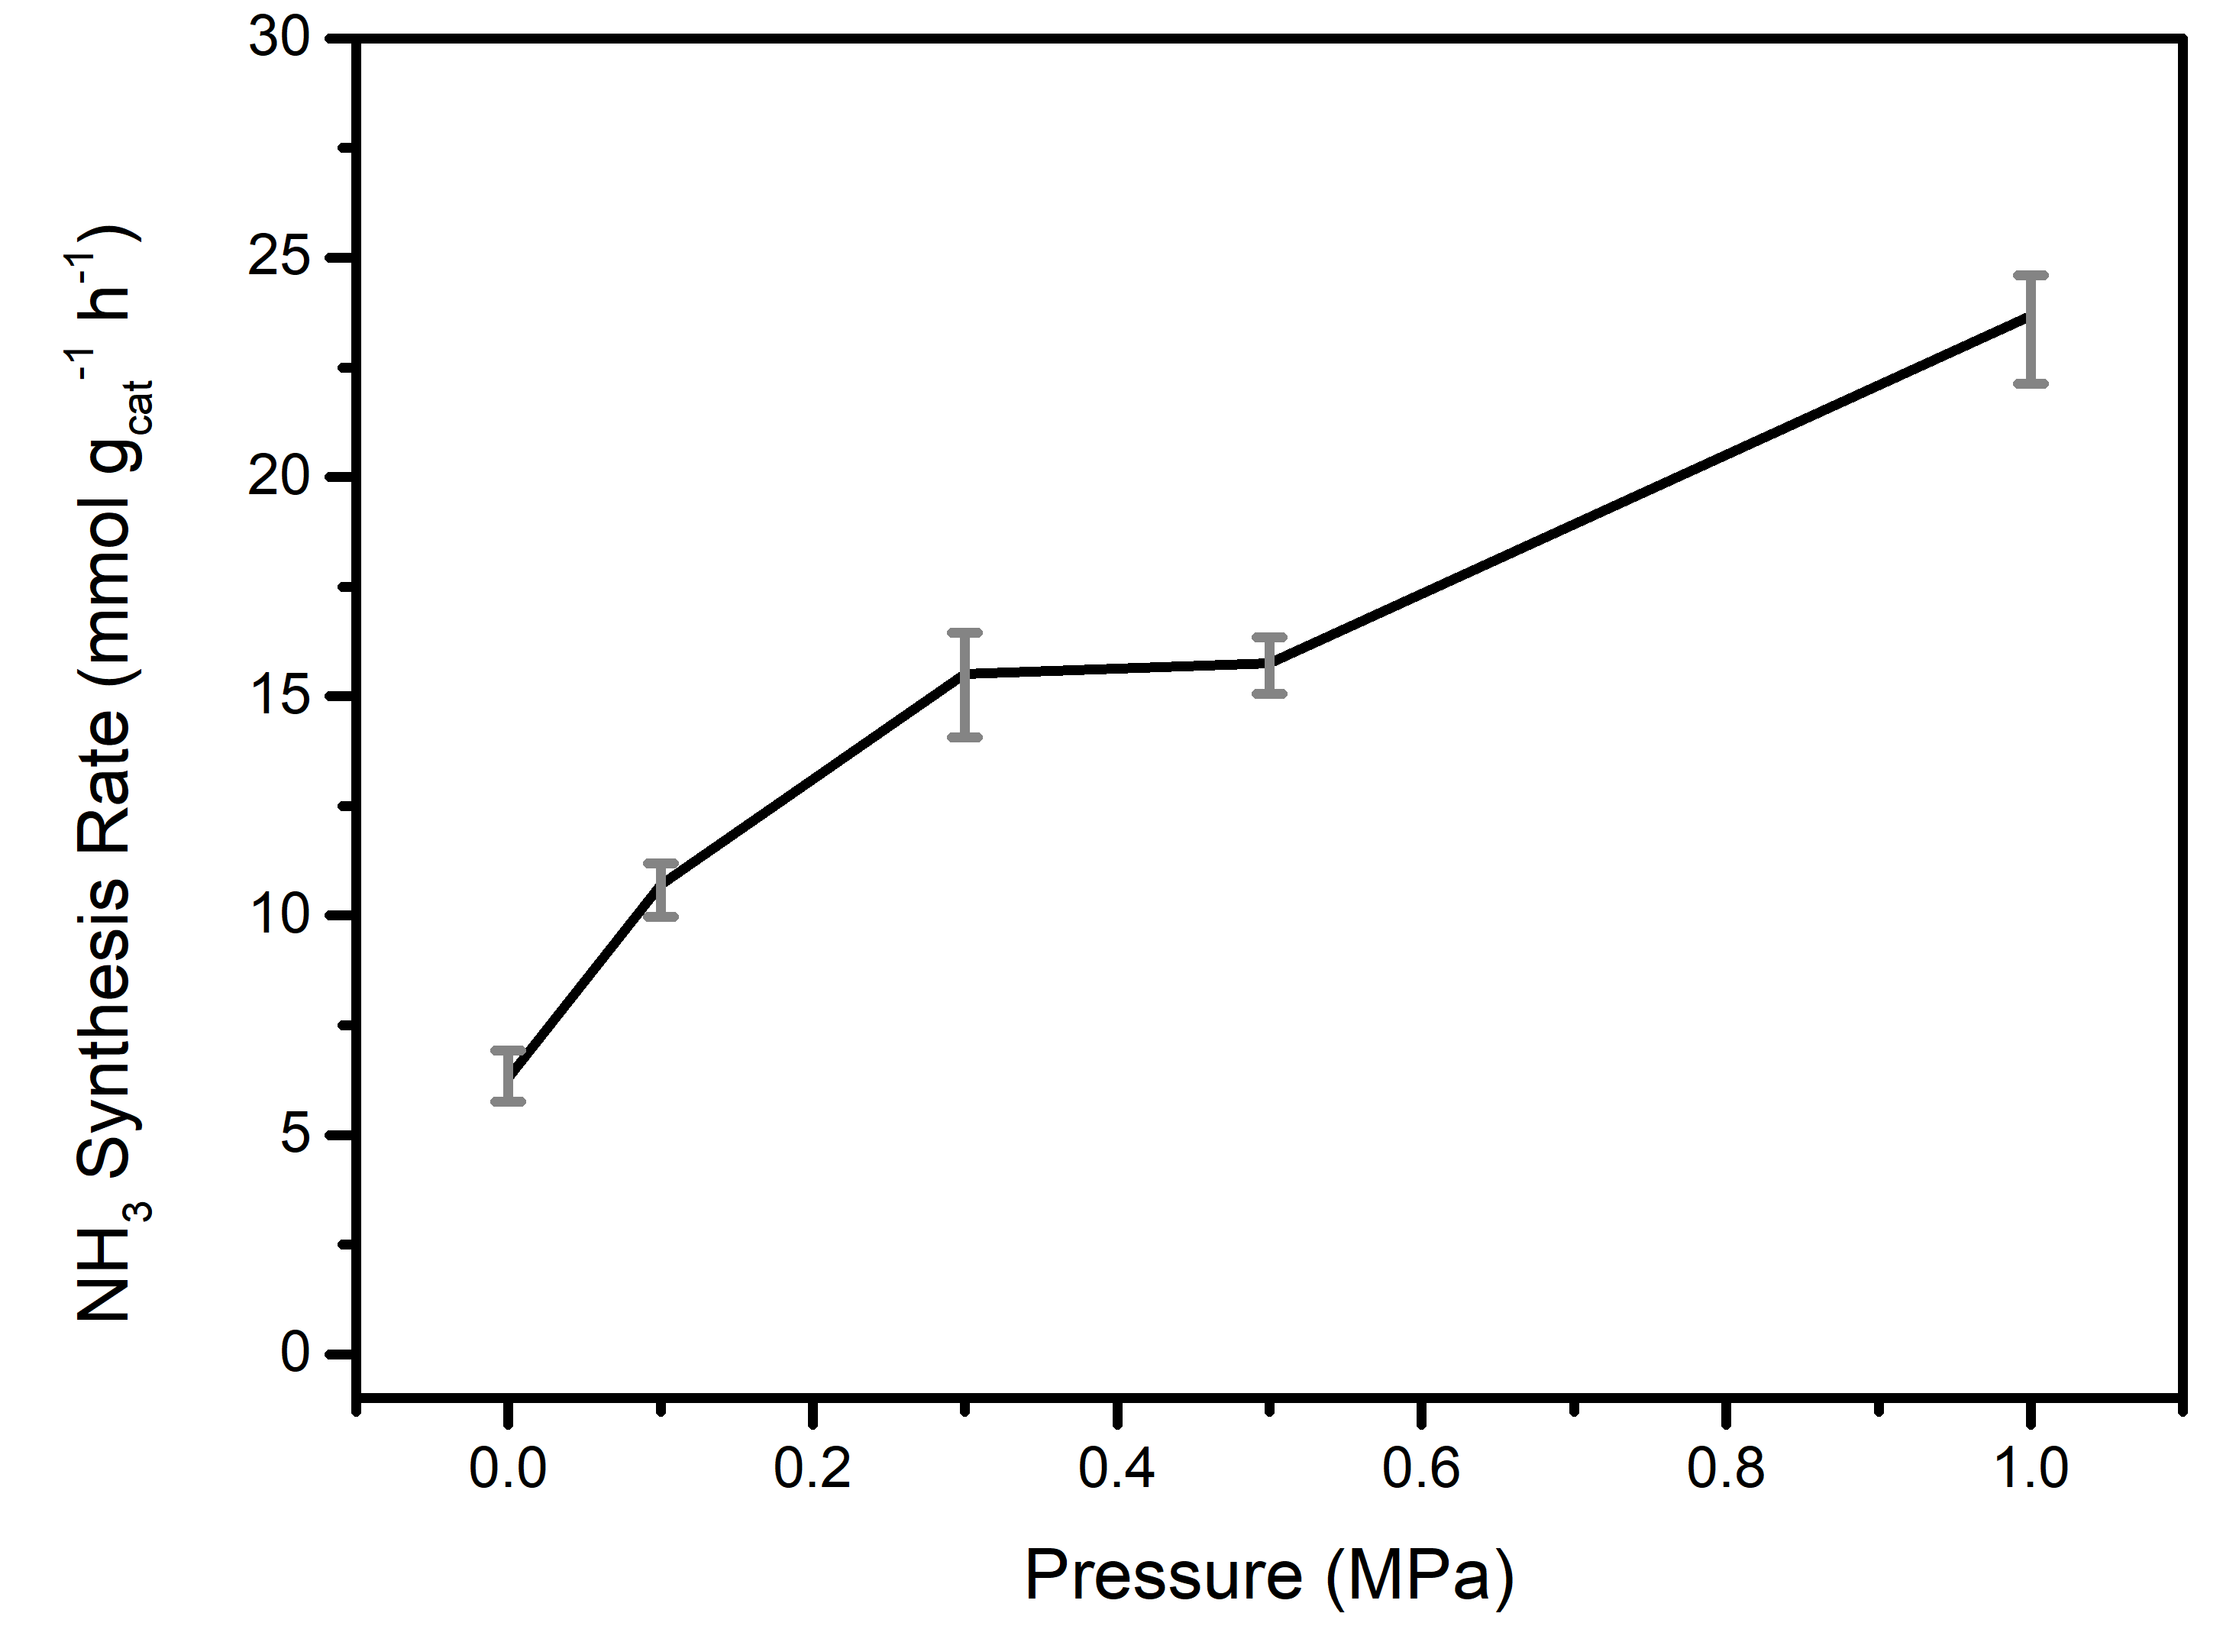


**(b)**

**(a)**

Figure S24. Reproducibility proof of Ru/LCO catalyst: (a) Temperature dependence of the ammonia synthesis rate at 1 MPa. (b) Pressure dependence of the ammonia synthesis rate at 400 °C, each catalyst had been reduced at 450 °C.


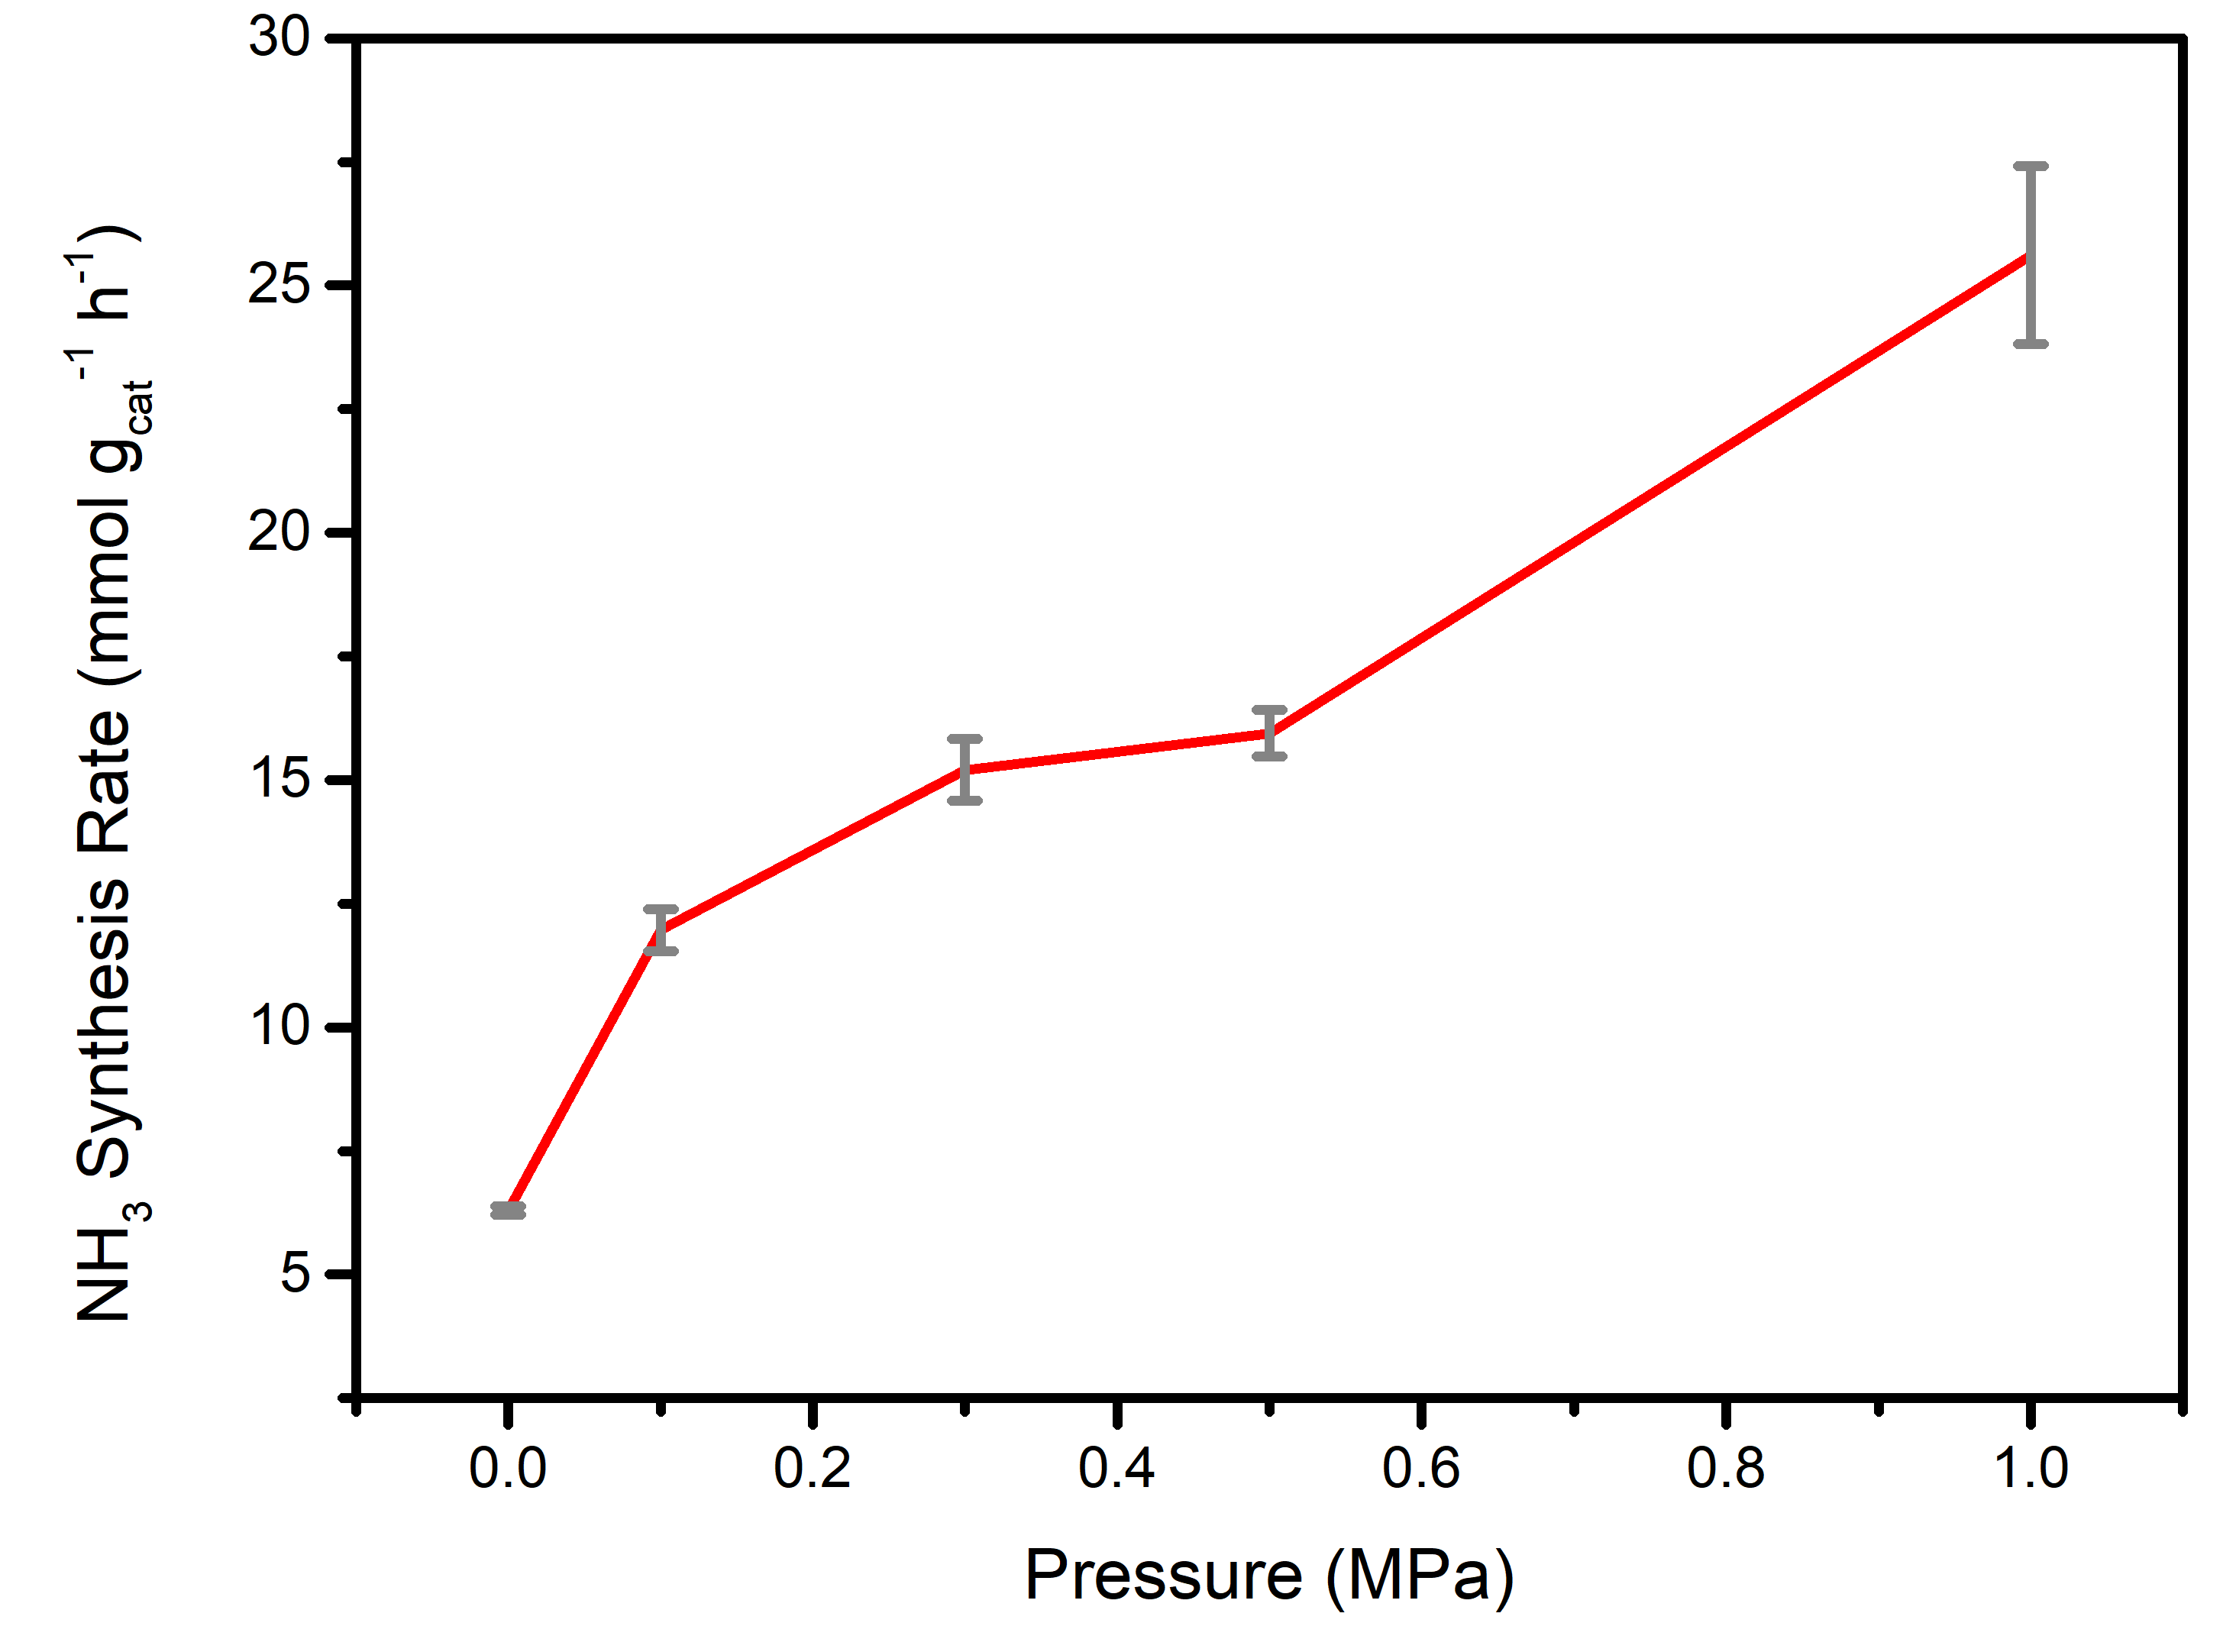

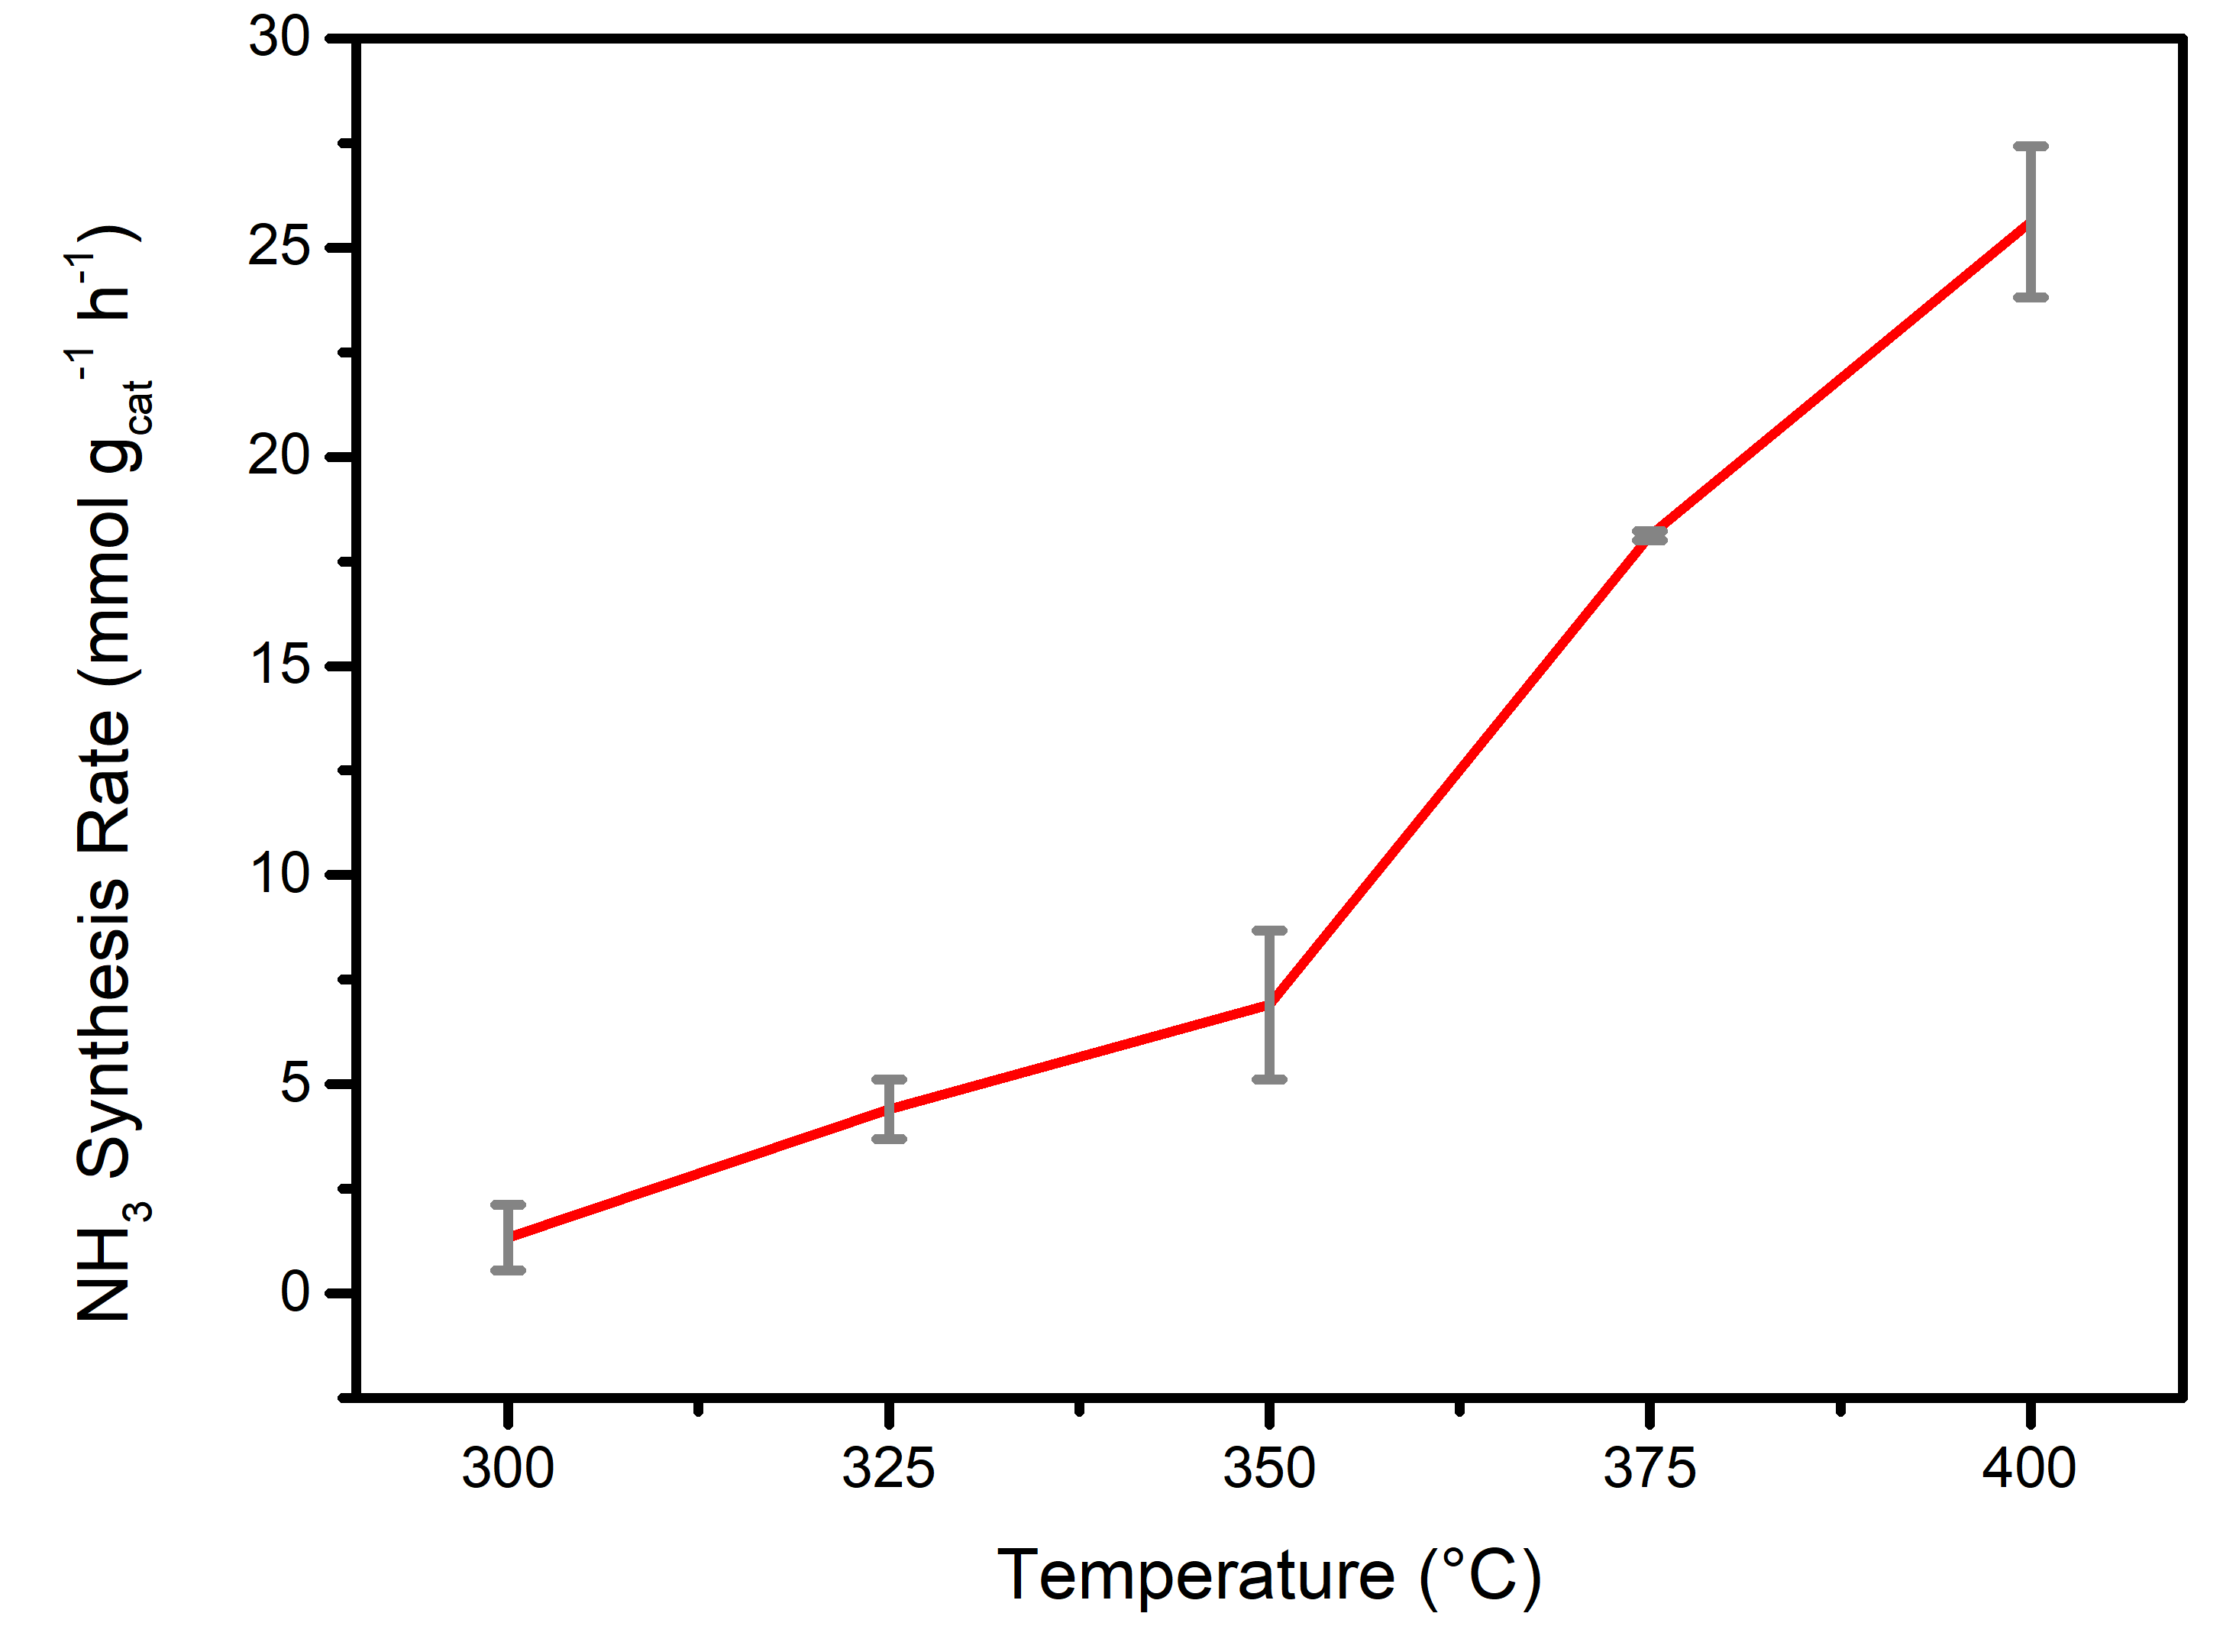


**(b)**

**(a)**

Figure S25. Reproducibility proof of Ru/Ba/LCO catalyst: (a) Temperature dependence of the ammonia synthesis rate at 1 MPa. (b) Pressure dependence of the ammonia synthesis rate at 400 °C, each catalyst had been reduced at 450 °C.


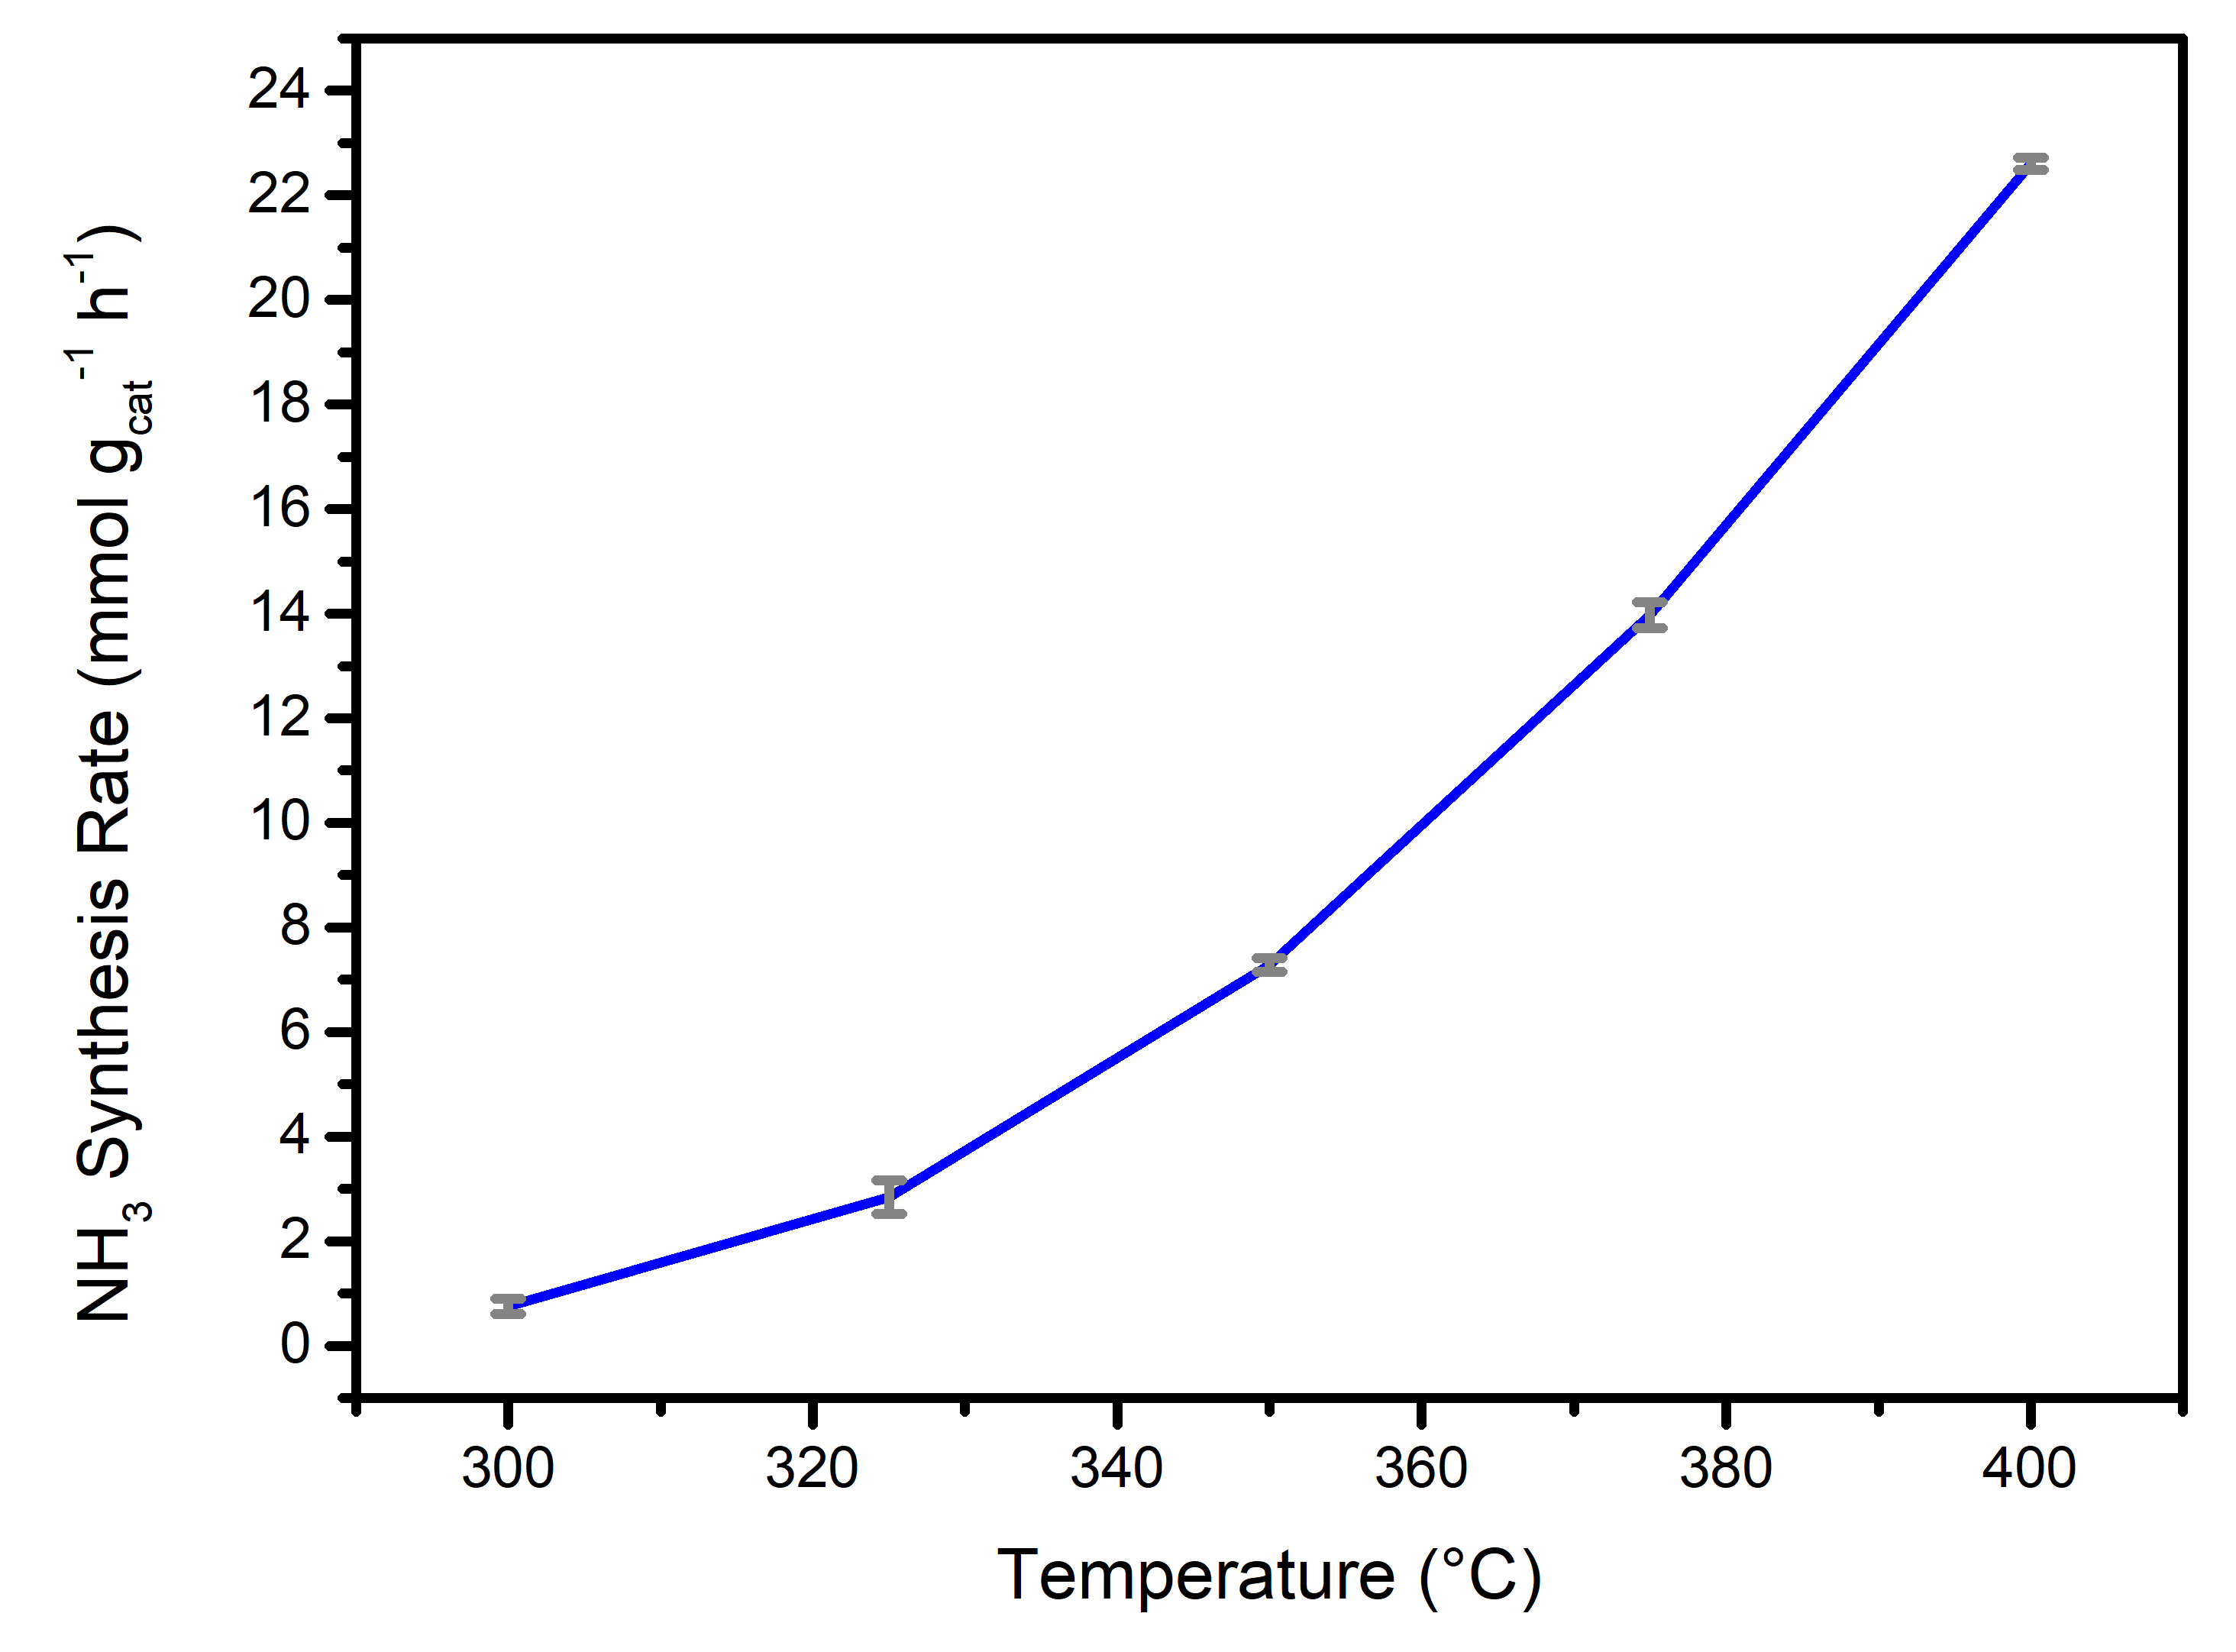

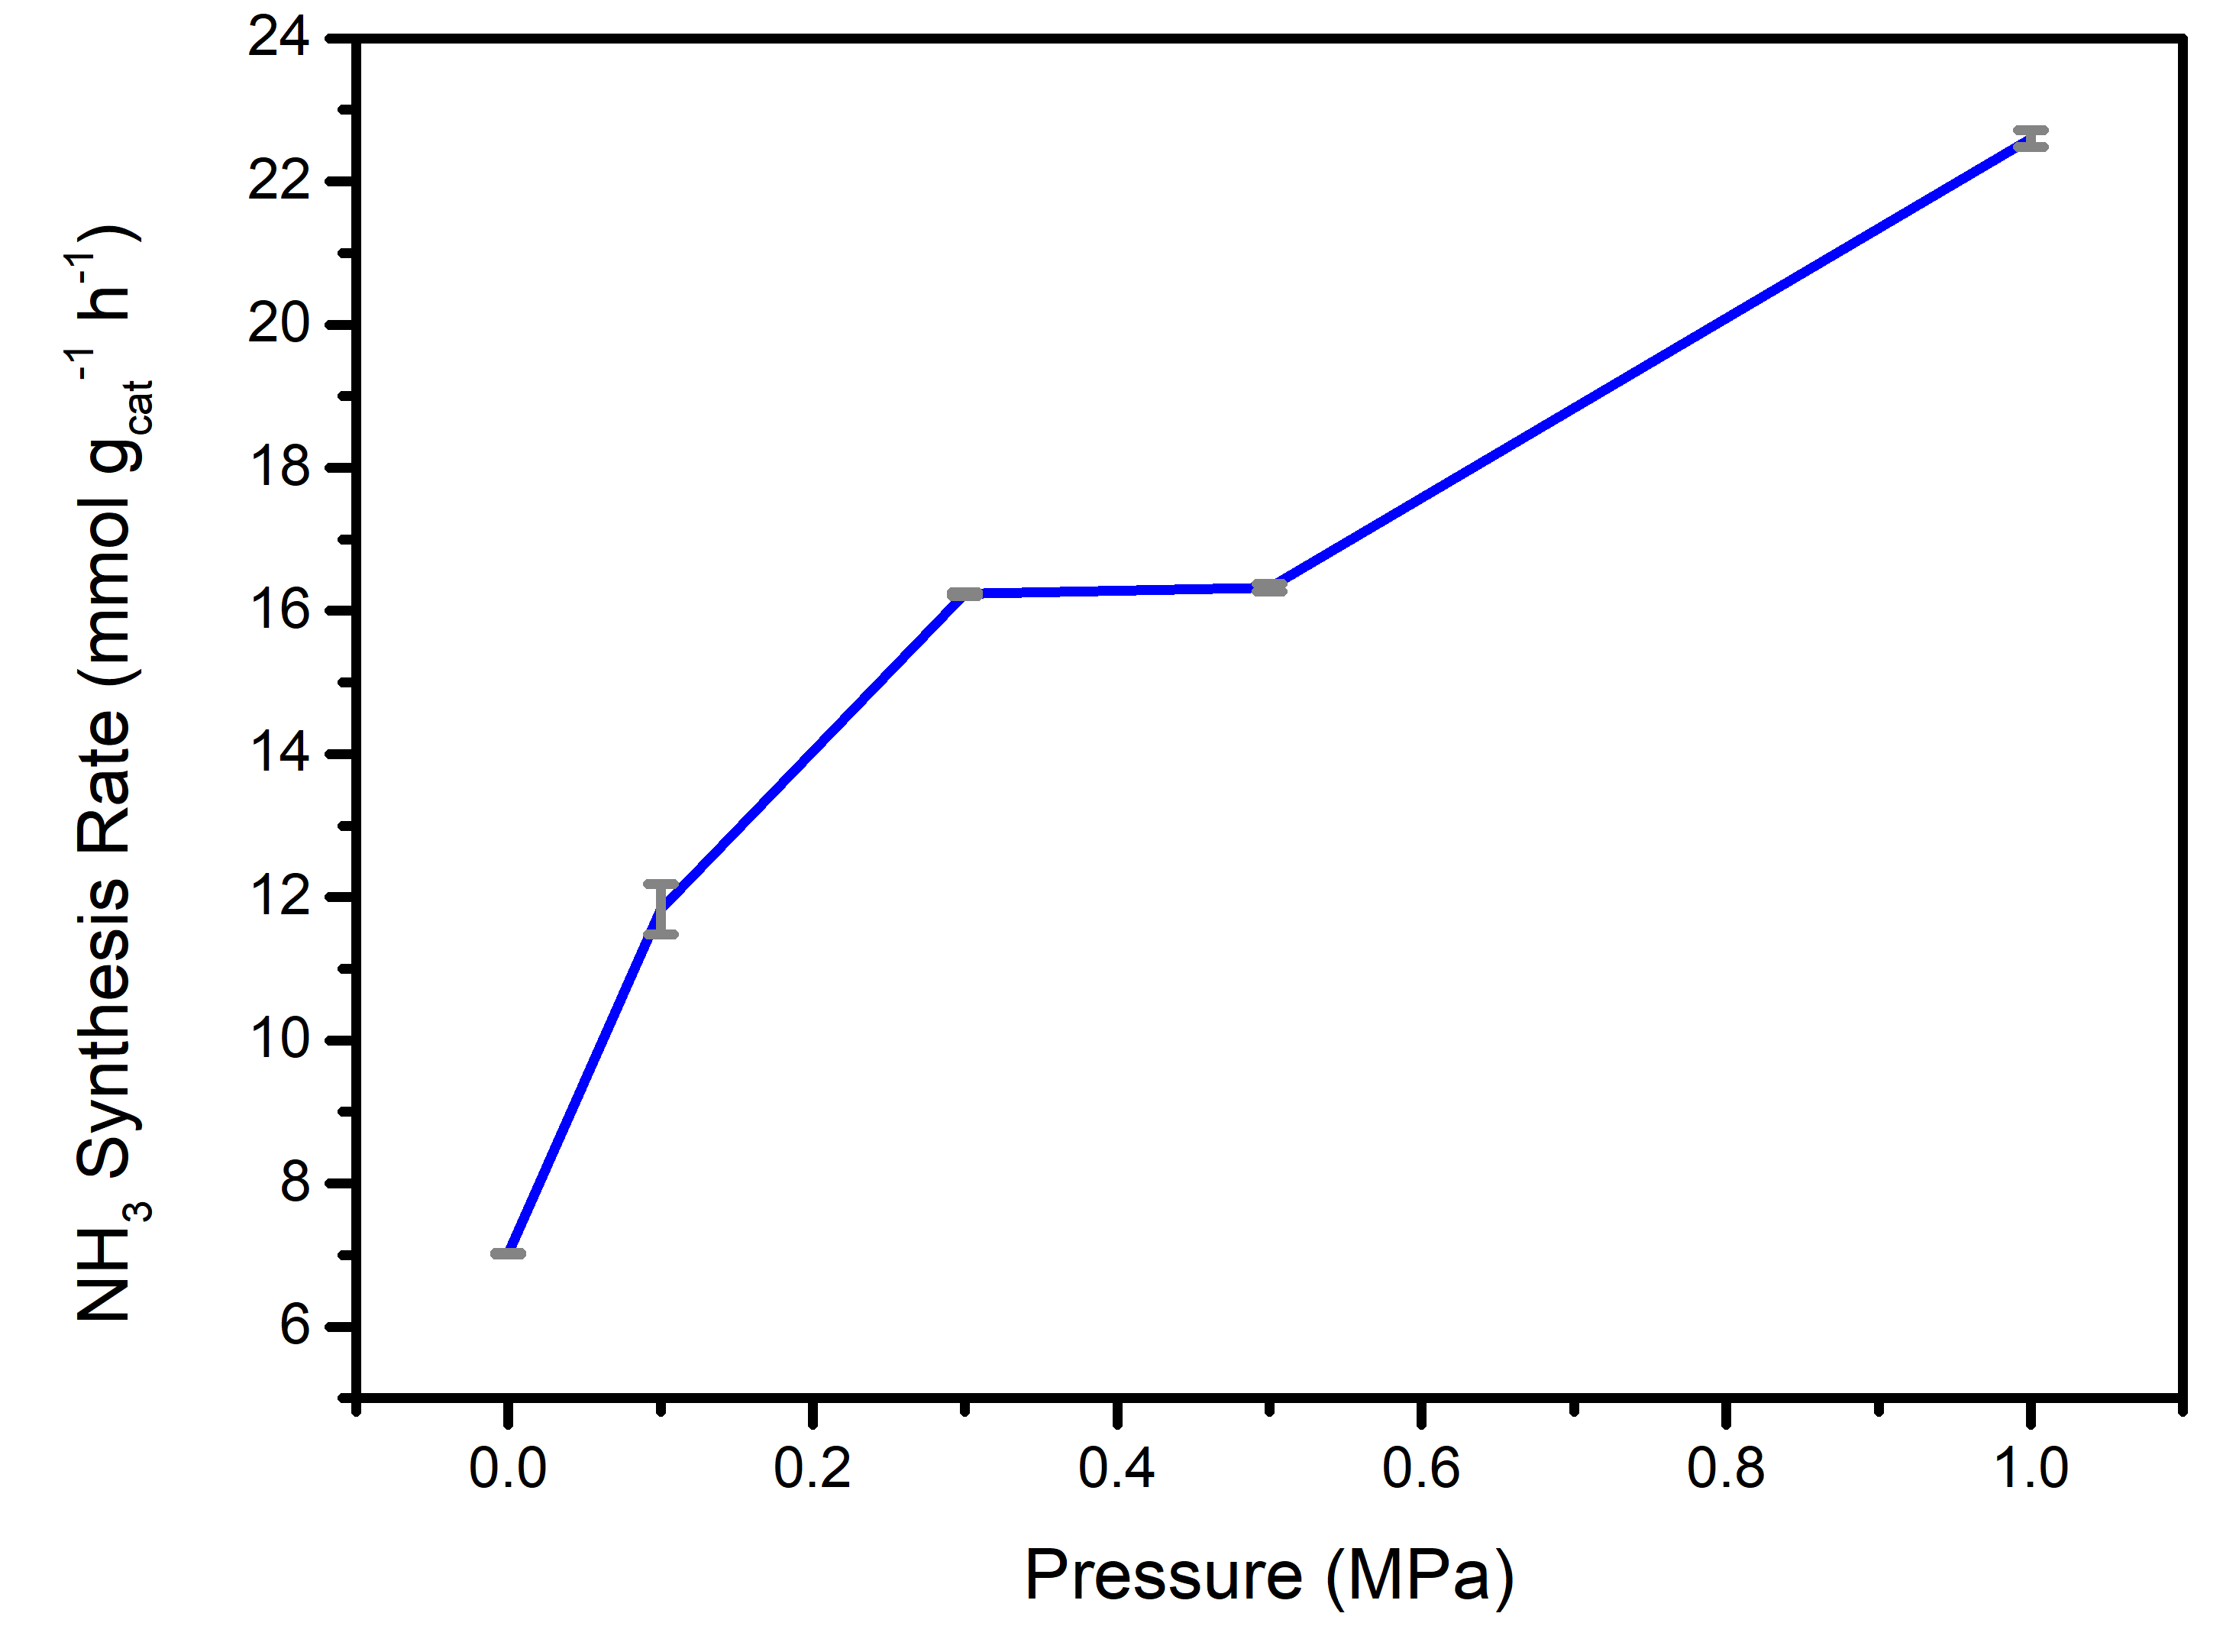


**(b)**

**(a)**

Figure S26. Reproducibility proof of Ru/Cs/LCO catalyst: (a) Temperature dependence of the ammonia synthesis rate at 1 MPa. (b) Pressure dependence of the ammonia synthesis rate at 400 °C, each catalyst had been reduced at 450 °C.


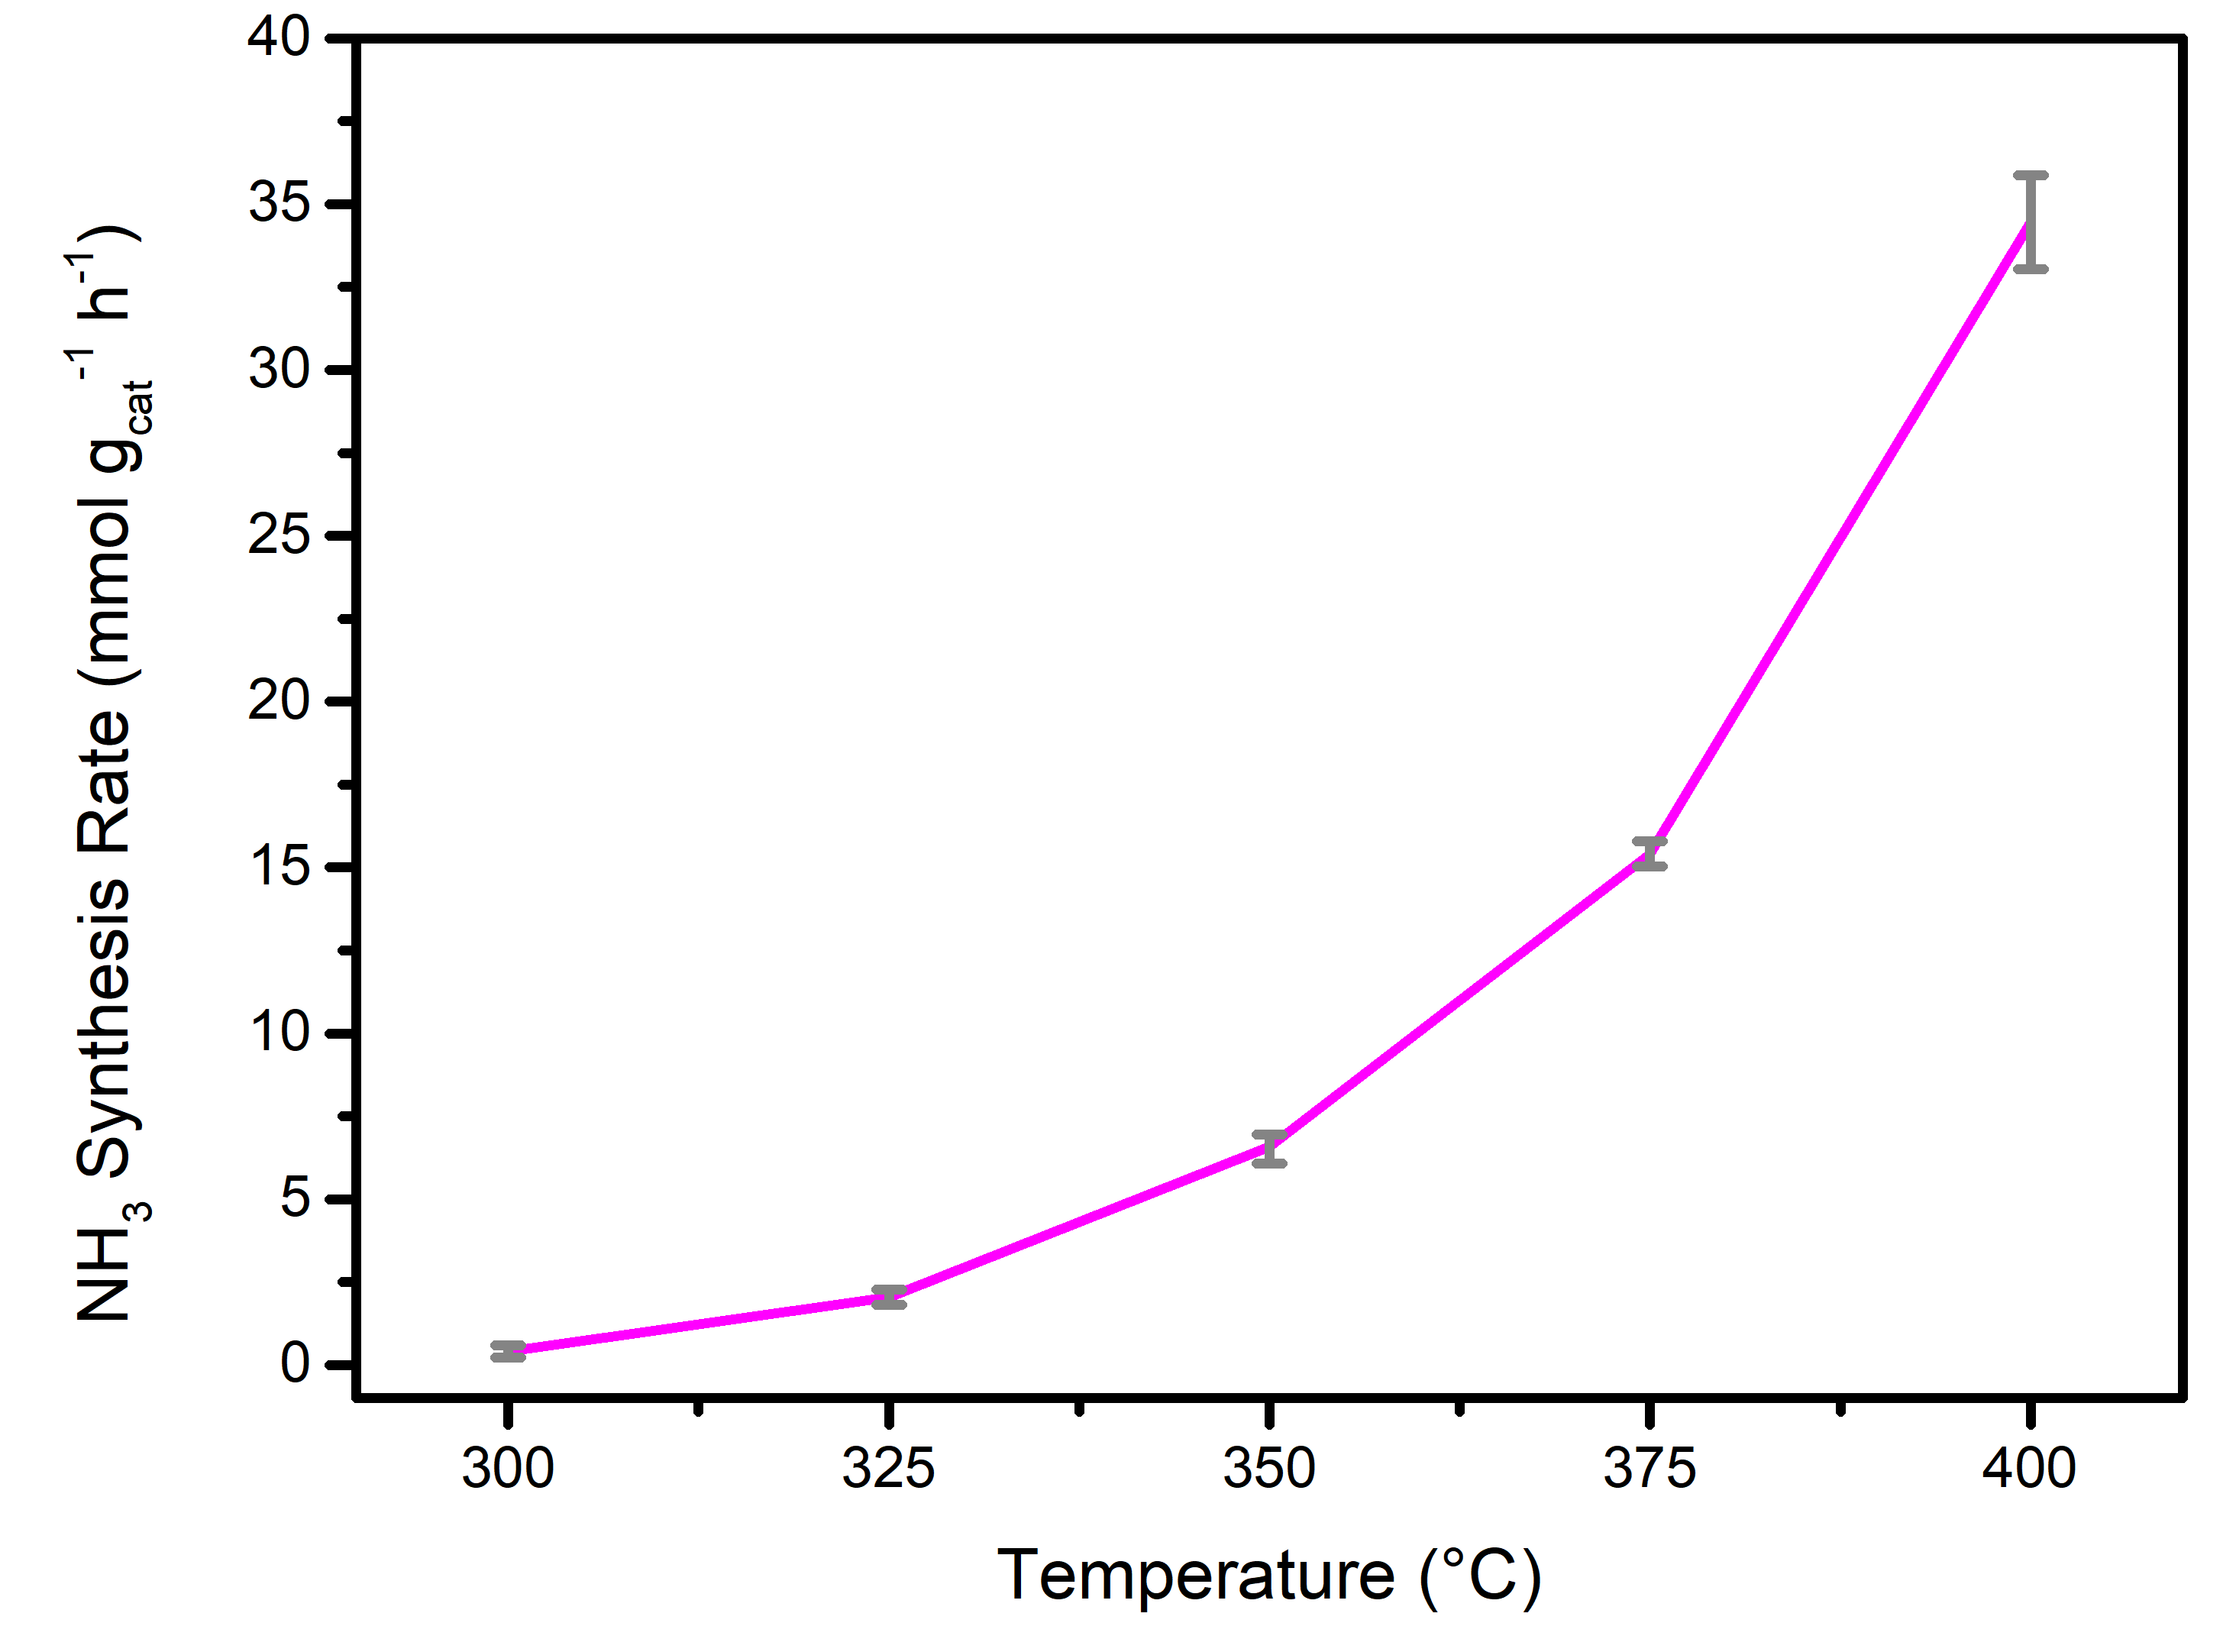

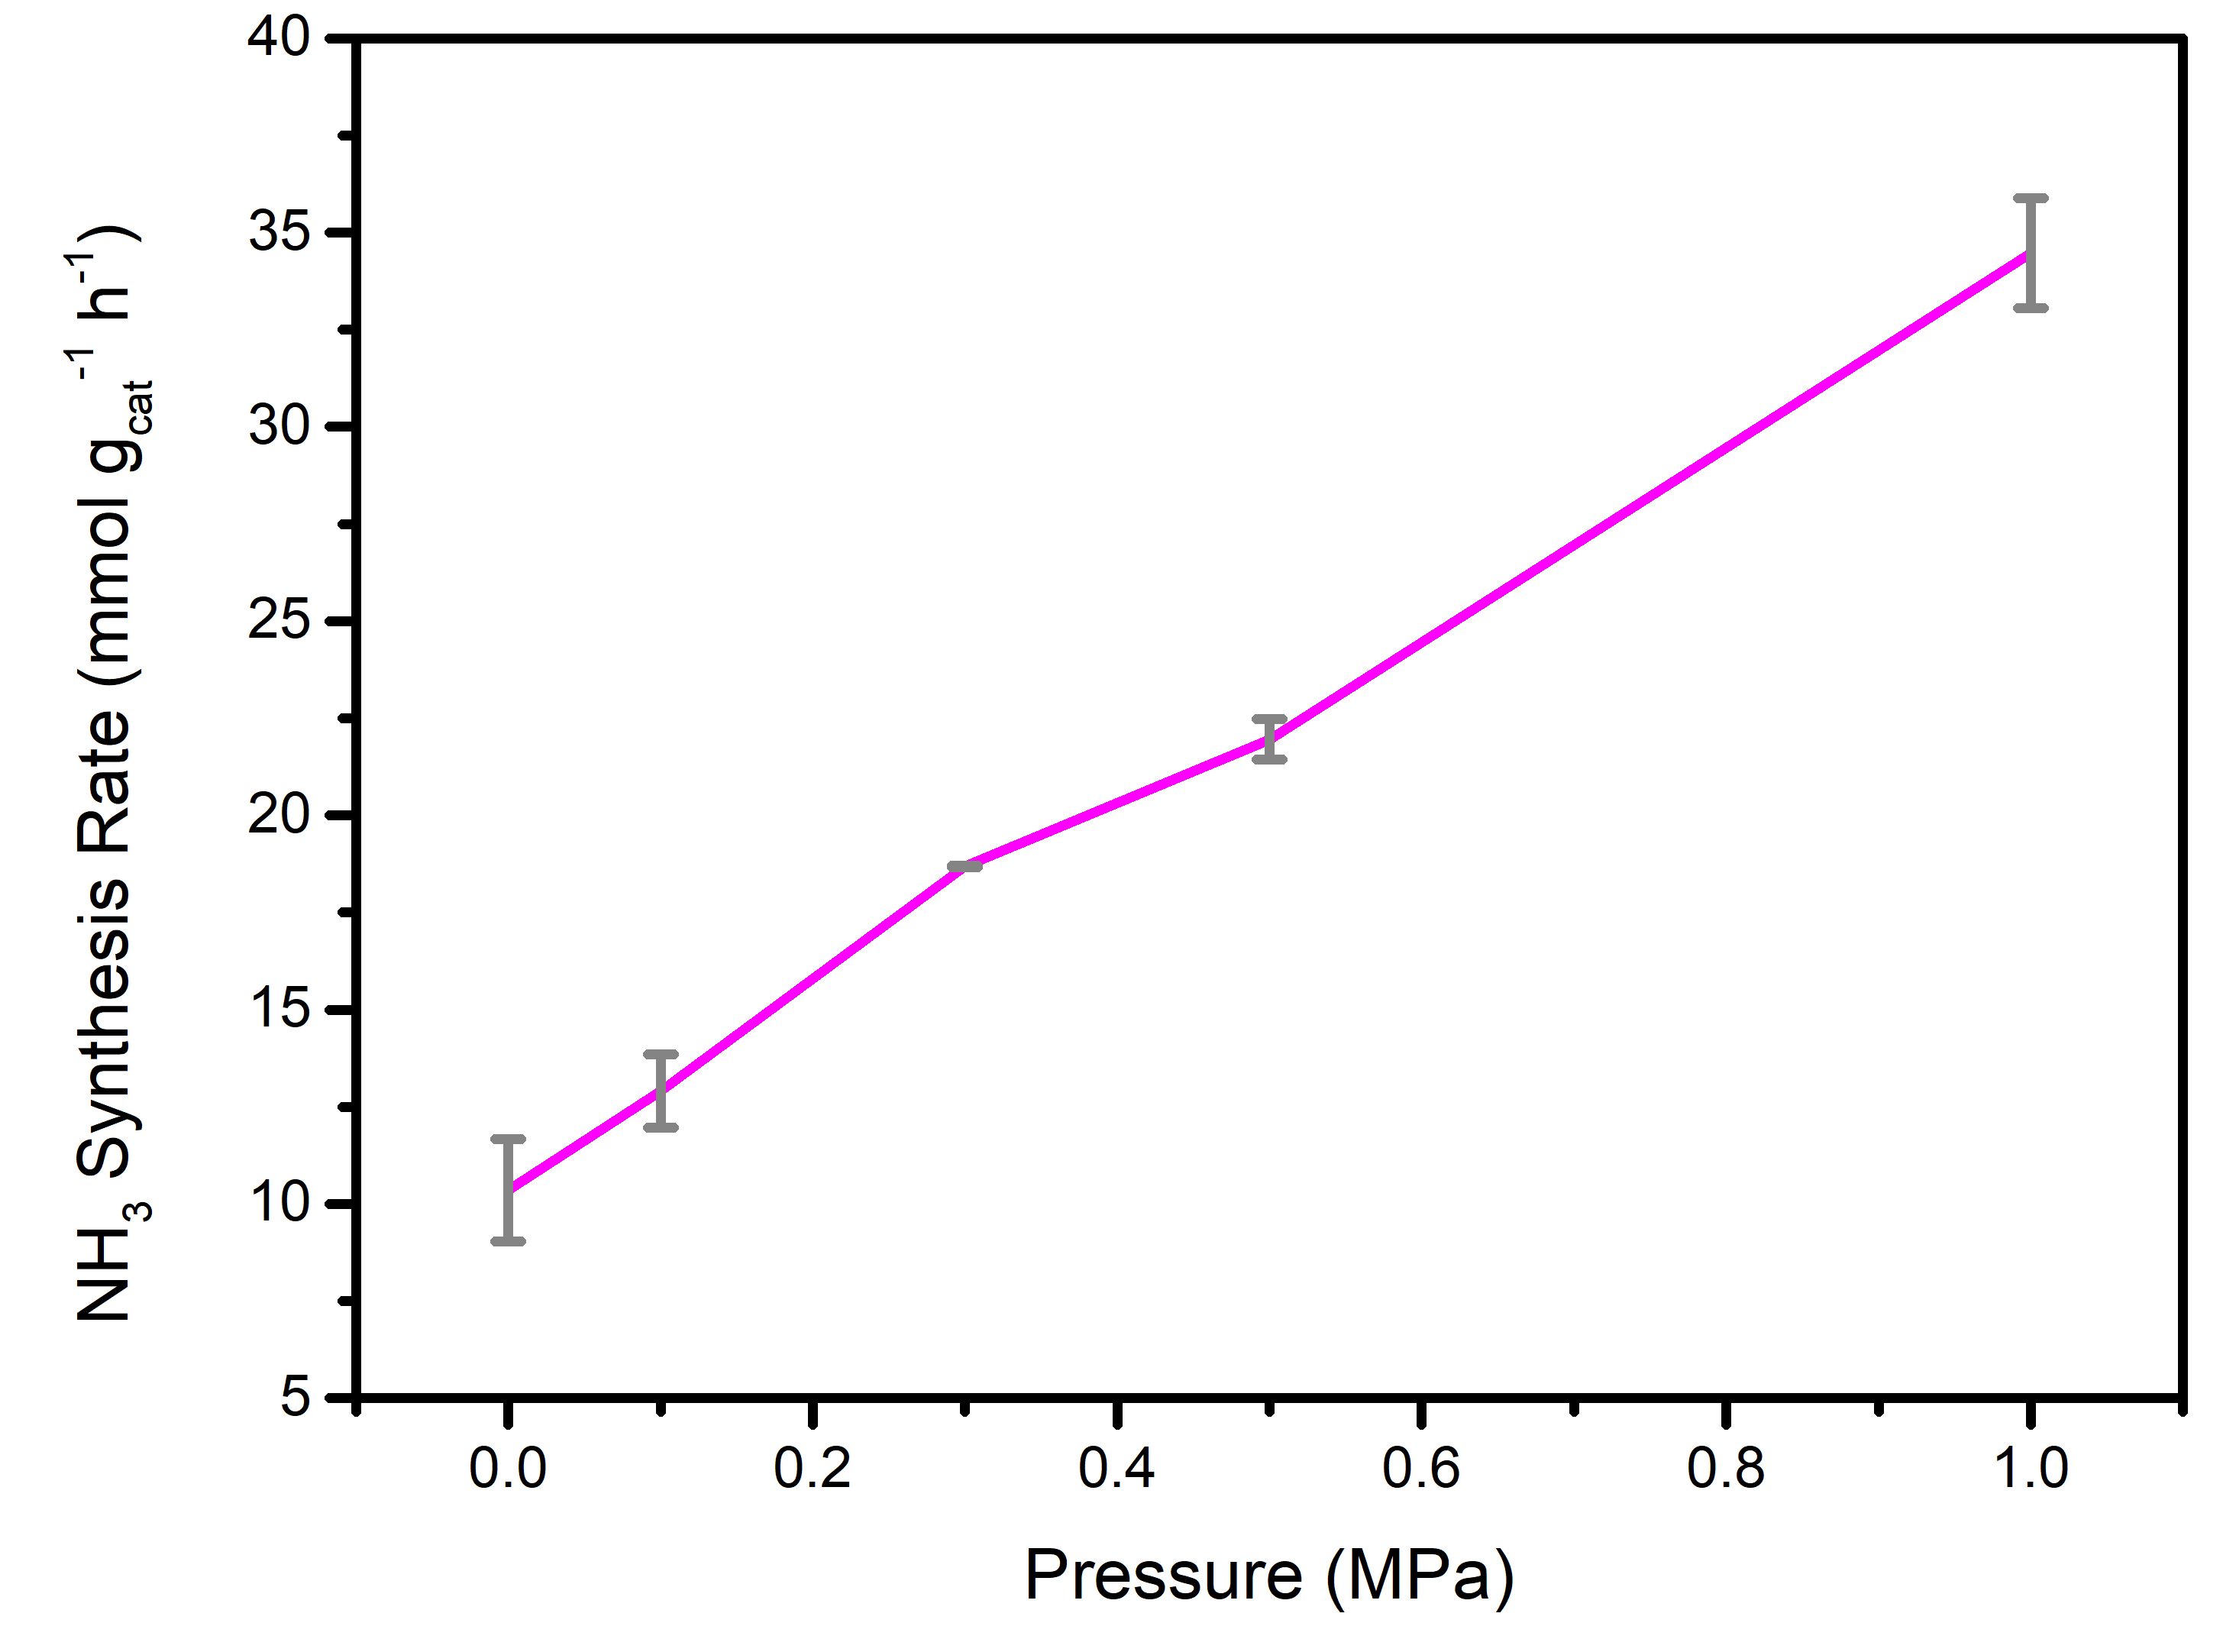


**(b)**

**(a)**

Figure S27. Reproducibility proof of Ru/K/LCO catalyst: (a) Temperature dependence of the ammonia synthesis rate at 1 MPa. (b) Pressure dependence of the ammonia synthesis rate at 400 °C, each catalyst had been reduced at 450 °C.


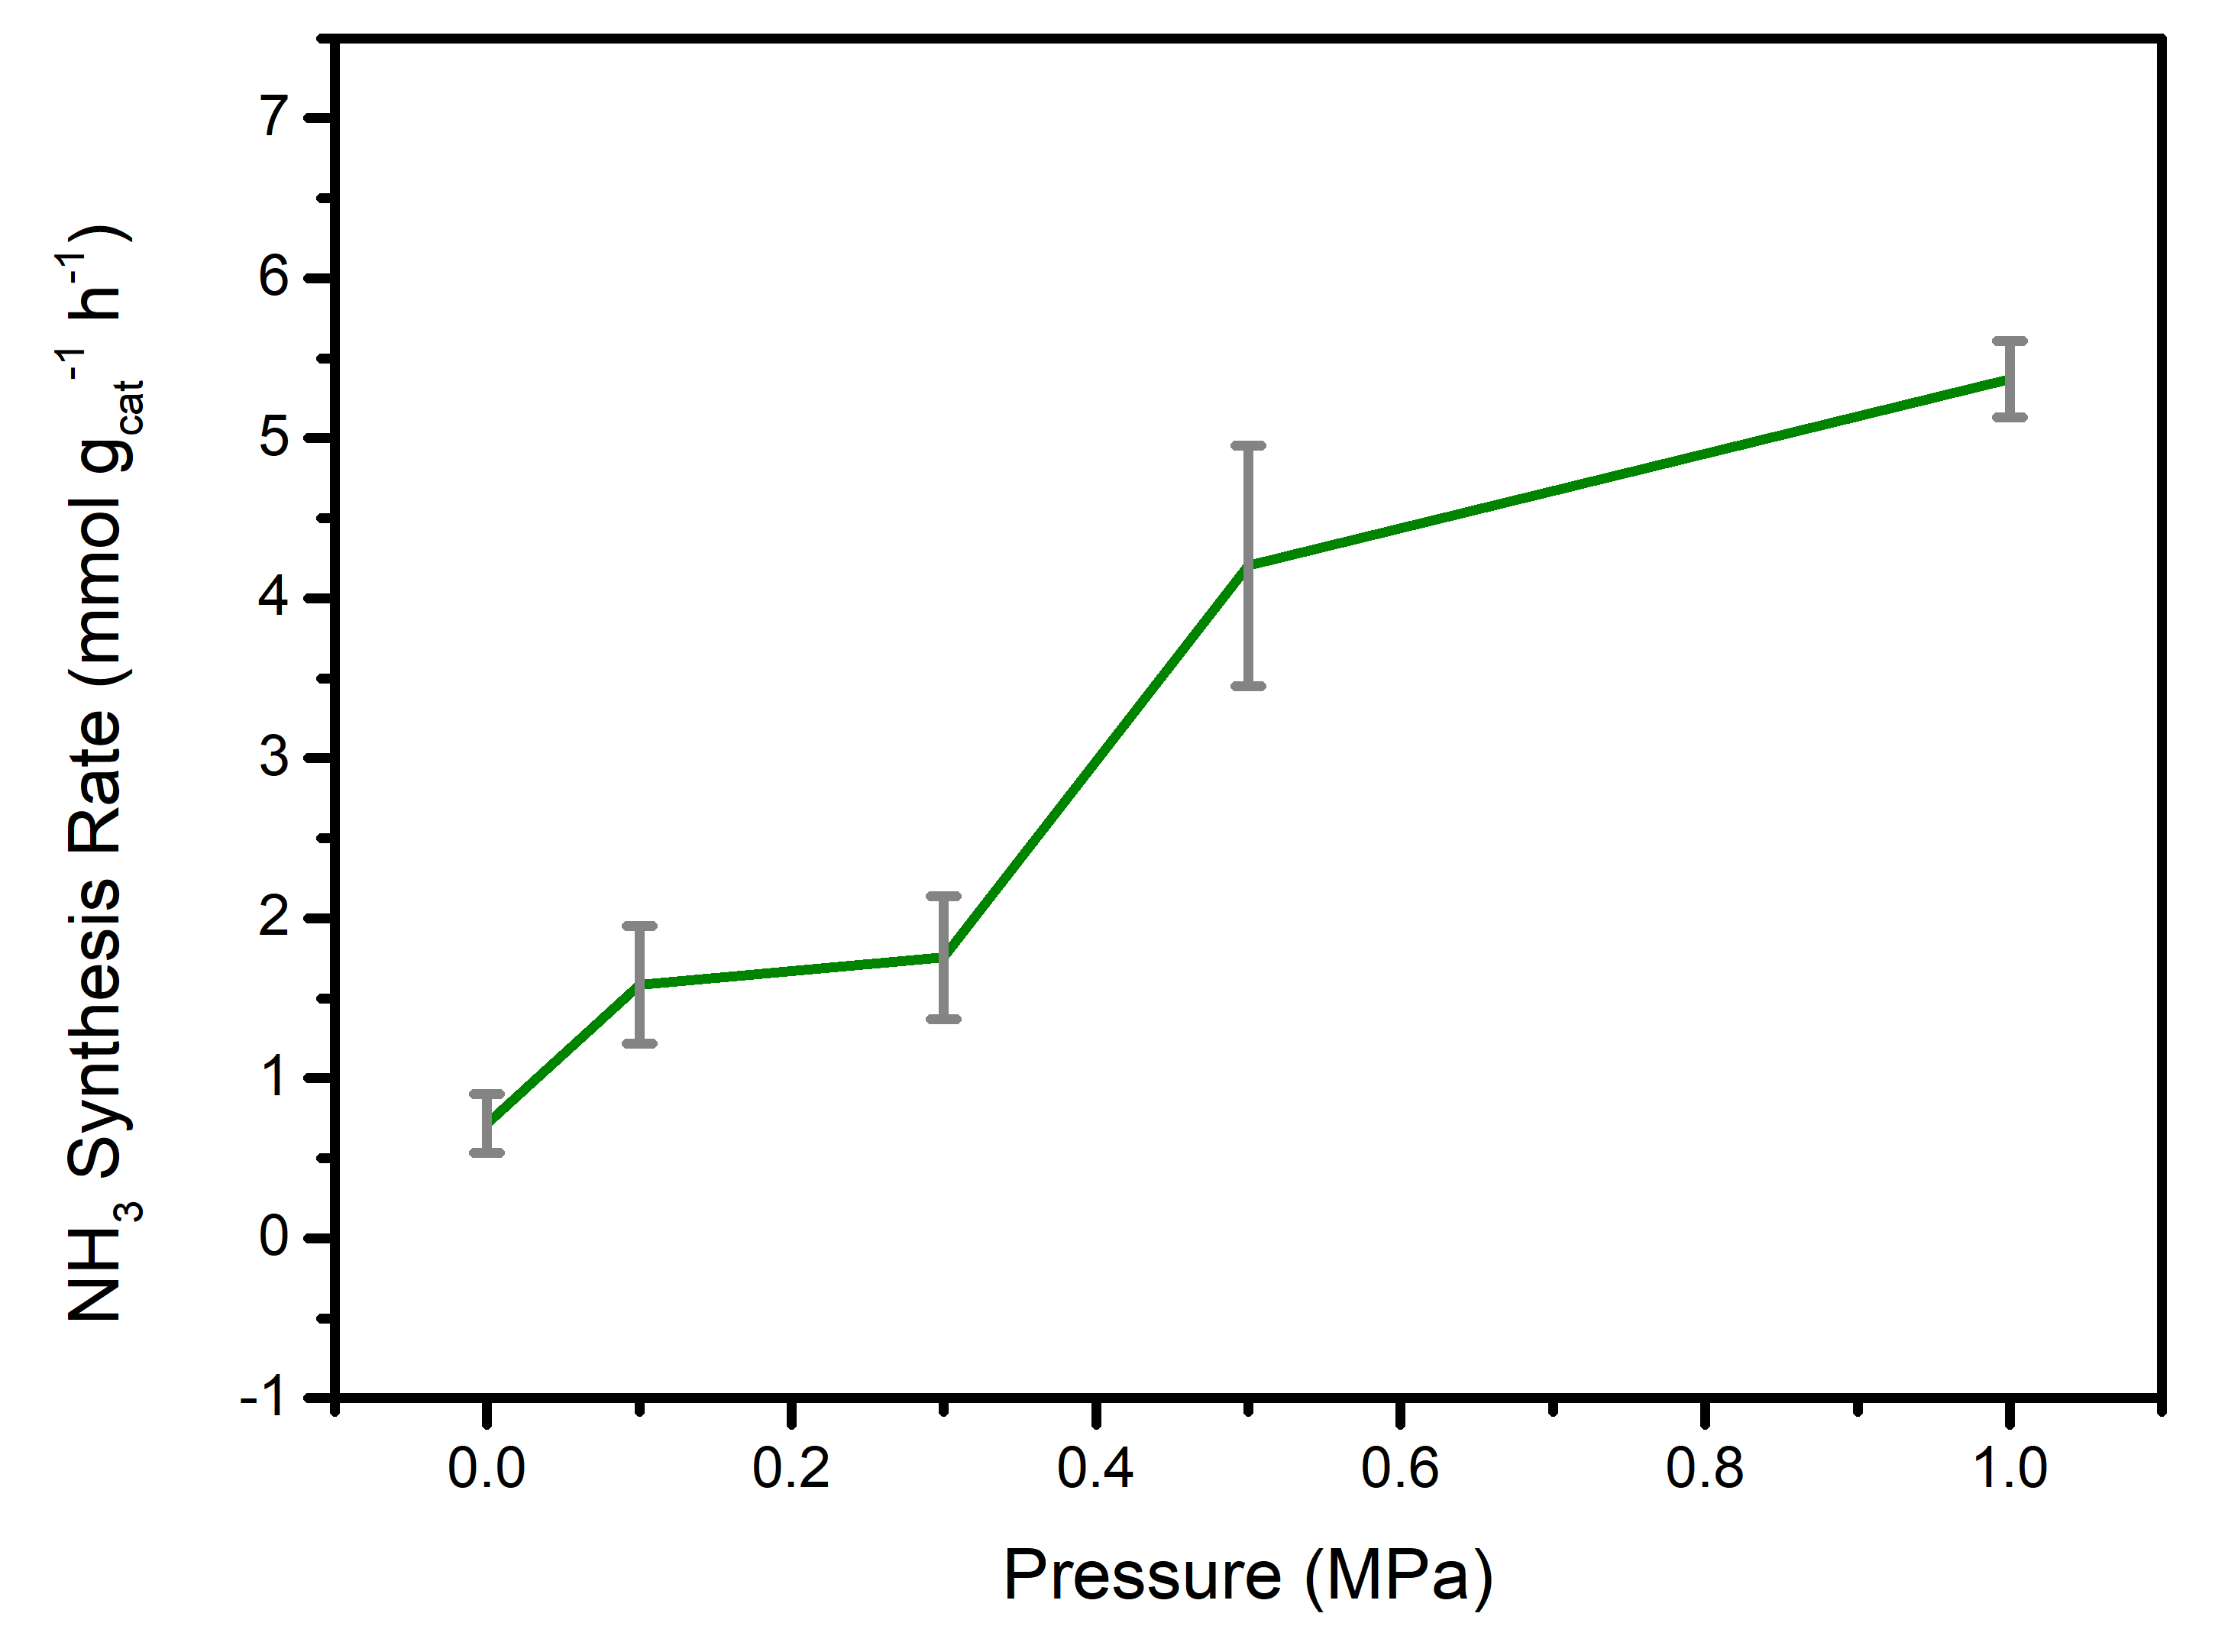

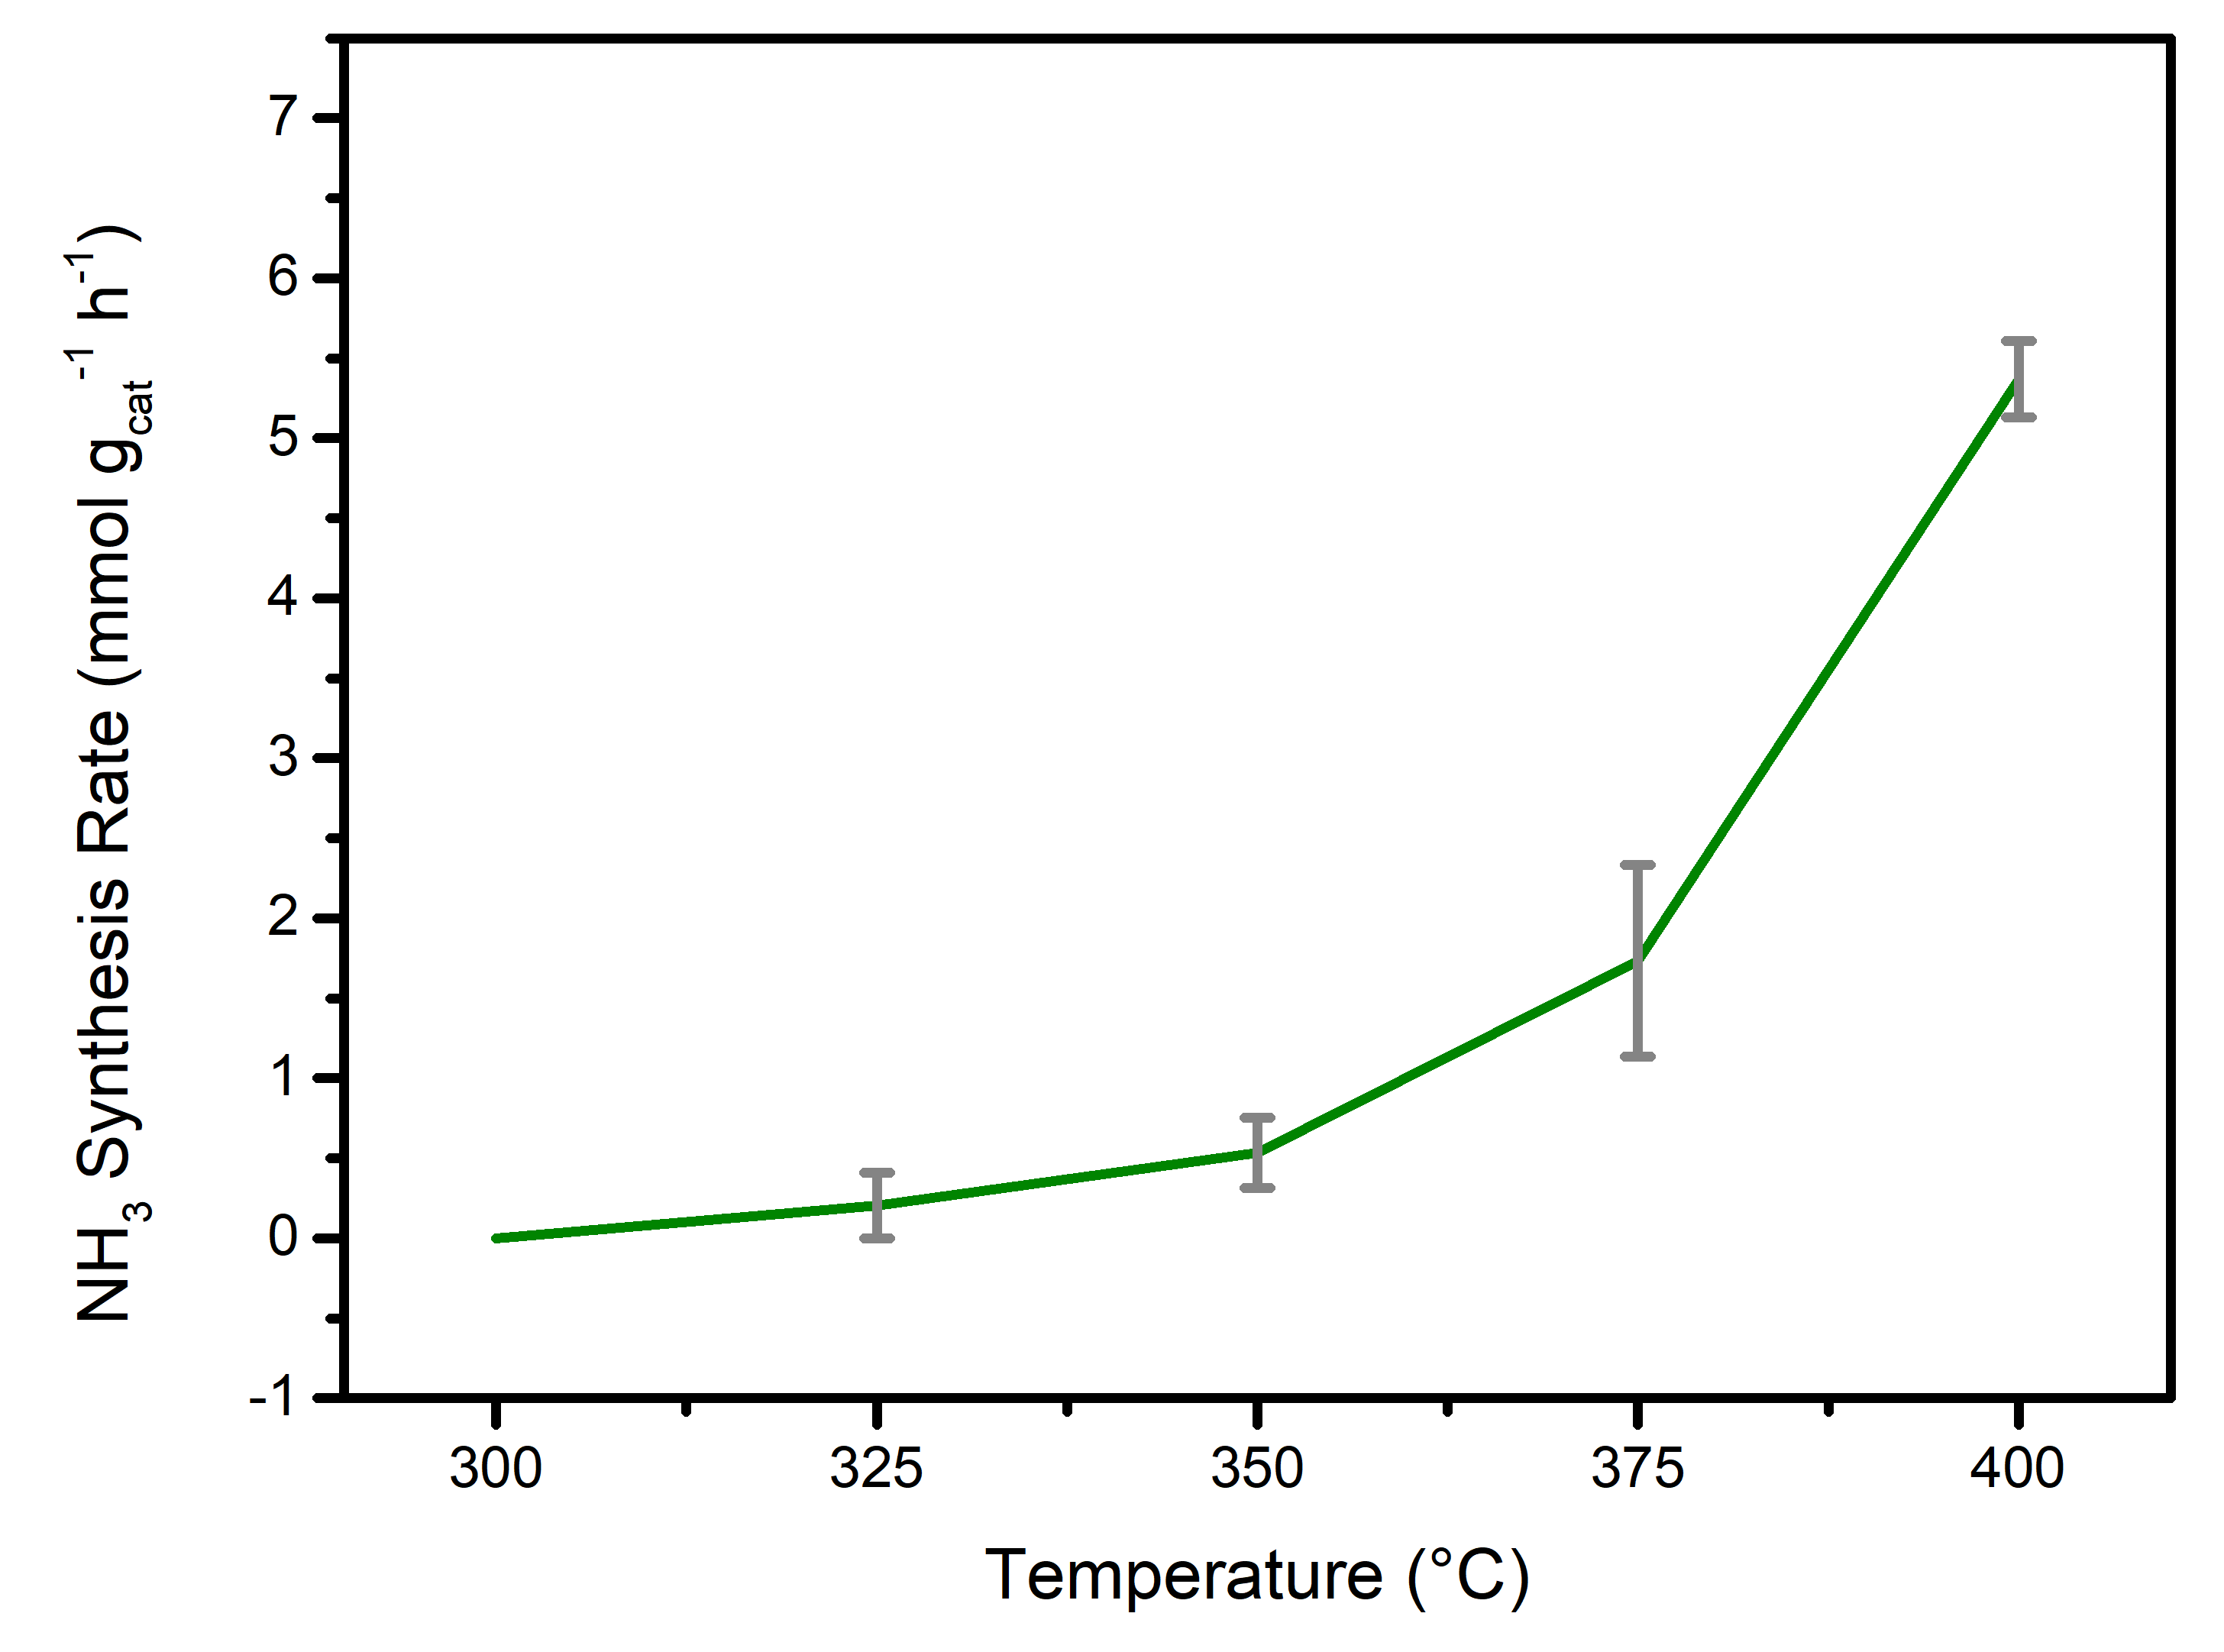


**(b)**

**(a)**

Figure S28. Reproducibility proof of Ru/Li/LCO catalyst: (a) Temperature dependence of the ammonia synthesis rate at 1 MPa. (b) Pressure dependence of the ammonia synthesis rate at 400 °C, each catalyst had been reduced at 450 °C.
